# Supplementary material for: Variable electronic structure and spin distribution in bis(2,2′-bipyridine)-metal complexes (M = Ru or Os) of 4,5-dioxido- and 4,5-diimido-pyrene
Source: Royal Society of Chemistry journal article supplement (doi:10.1039/d1dt00282a), 2021-01-01

## **Supporting Information**

### **Variable electronic structure and spin distribution in bis(2,2'-bipyridine)-metal complexes (M = Ru or Os) of 4,5-dioxido- and 4,5-diimido-pyrene**

Madhumita Chatterjee,<sup>§</sup> Sudipta Mondal,<sup>†</sup> Arijit Singha Hazari<sup>§</sup>, Stanislav Zalis,<sup>‡</sup> Wolfgang Kaim,<sup>\*,†</sup> and Goutam Kumar Lahiri<sup>\*,§</sup>

<sup>§</sup>*Department of Chemistry, Indian Institute of Technology Bombay, Powai, Mumbai-400076, India. E-mail: [lahiri@chem.iitb.ac.in](mailto:lahiri@chem.iitb.ac.in) (G.K.L)*

<sup>†</sup>*Institut für Anorganische Chemie, Universität Stuttgart, Pfaffenwaldring 55, D-70550, E-mail: [wolfgang.kaim@iac.uni-stuttgart.de](mailto:wolfgang.kaim@iac.uni-stuttgart.de) (W.K)*

<sup>‡</sup>*J. Heyrovský Institute of Physical Chemistry, v.v.i., Academy of Sciences of the Czech Republic, Dolejskova 3, CZ-18223 Prague, Czech Republic*

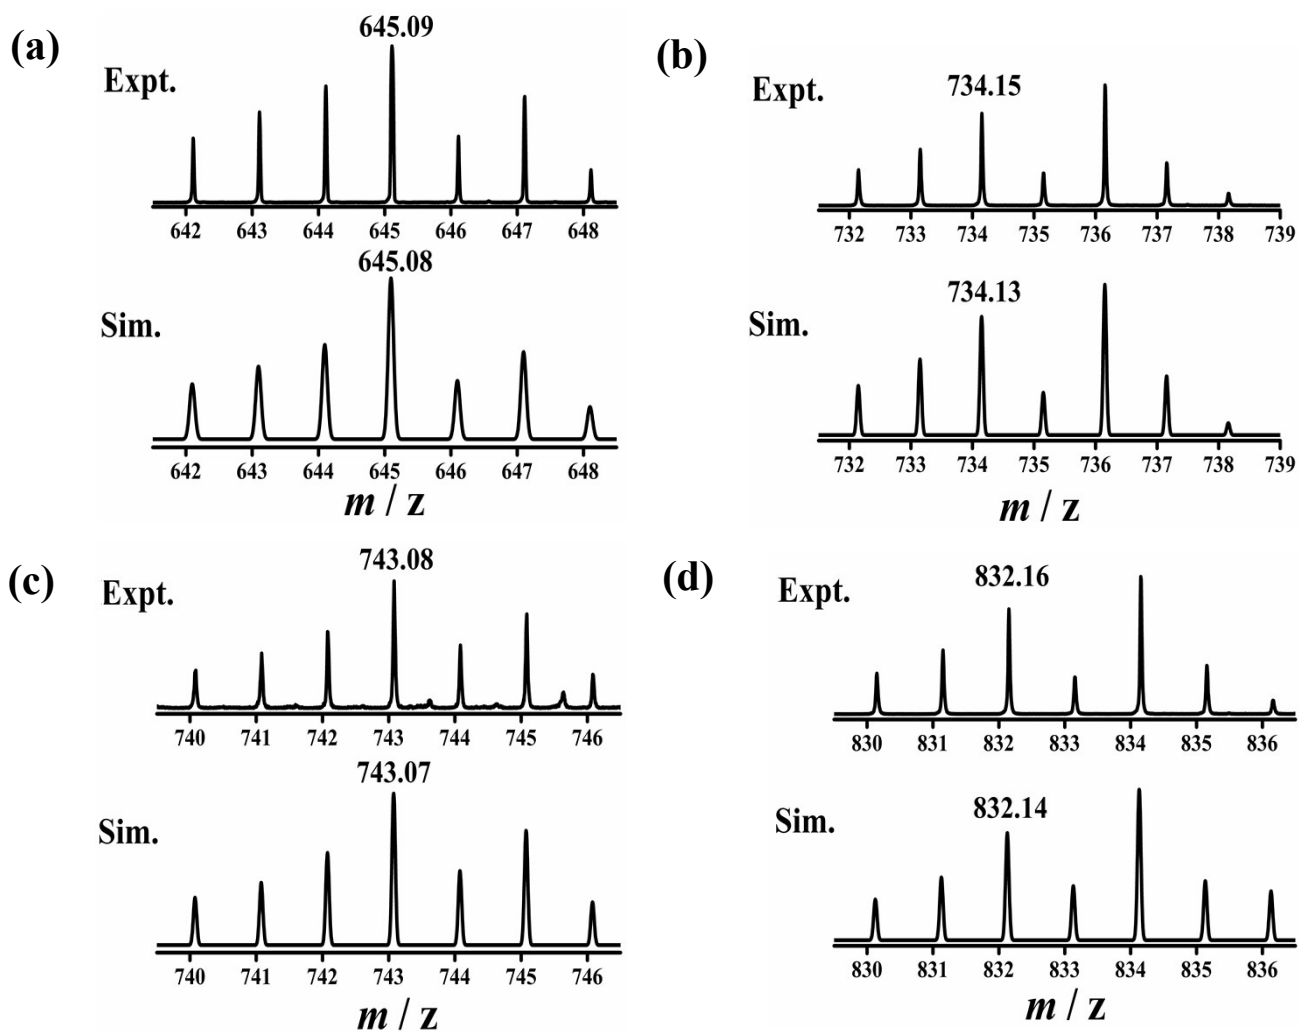

**Fig. S1** Experimental and simulated ESI(+) mass spectra of (a) [1] $\text{ClO}_4$ , (b) [2] $\text{ClO}_4$  (c) [3] $(\text{ClO}_4)_2$  and (d) [4] $(\text{ClO}_4)_2$  in  $\text{CH}_3\text{CN}$ .

(a)

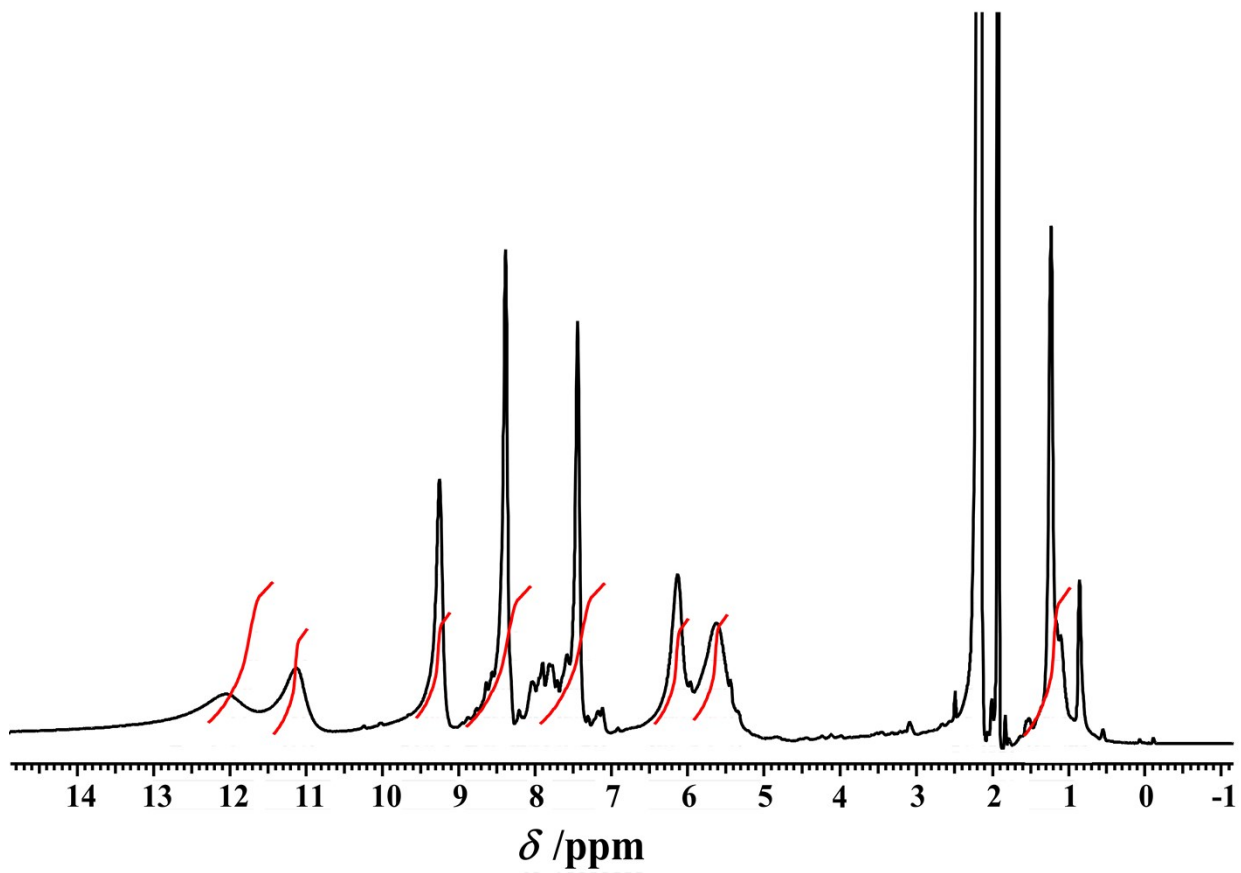

(b)

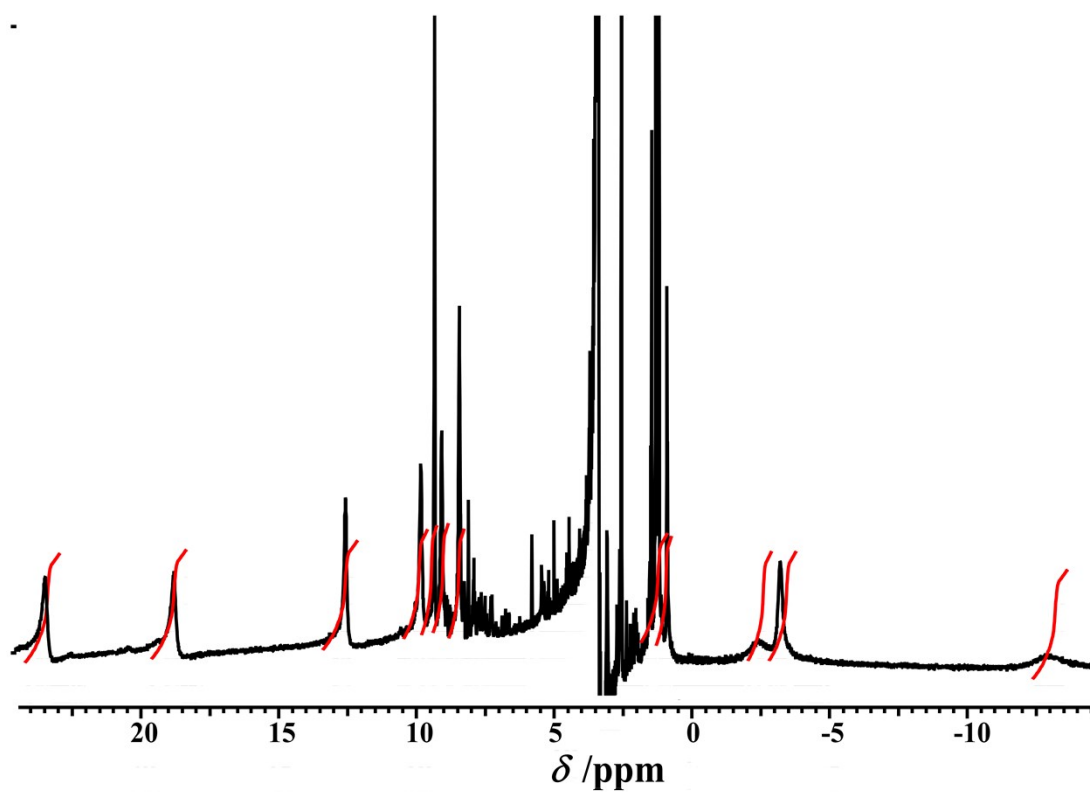

Fig. S2  $^1\text{H}$  NMR spectra of (a)  $[1]\text{ClO}_4$  in  $\text{CD}_3\text{CN}$  and (b)  $[2]\text{ClO}_4$  in  $(\text{CD}_3)_2\text{SO}$ .

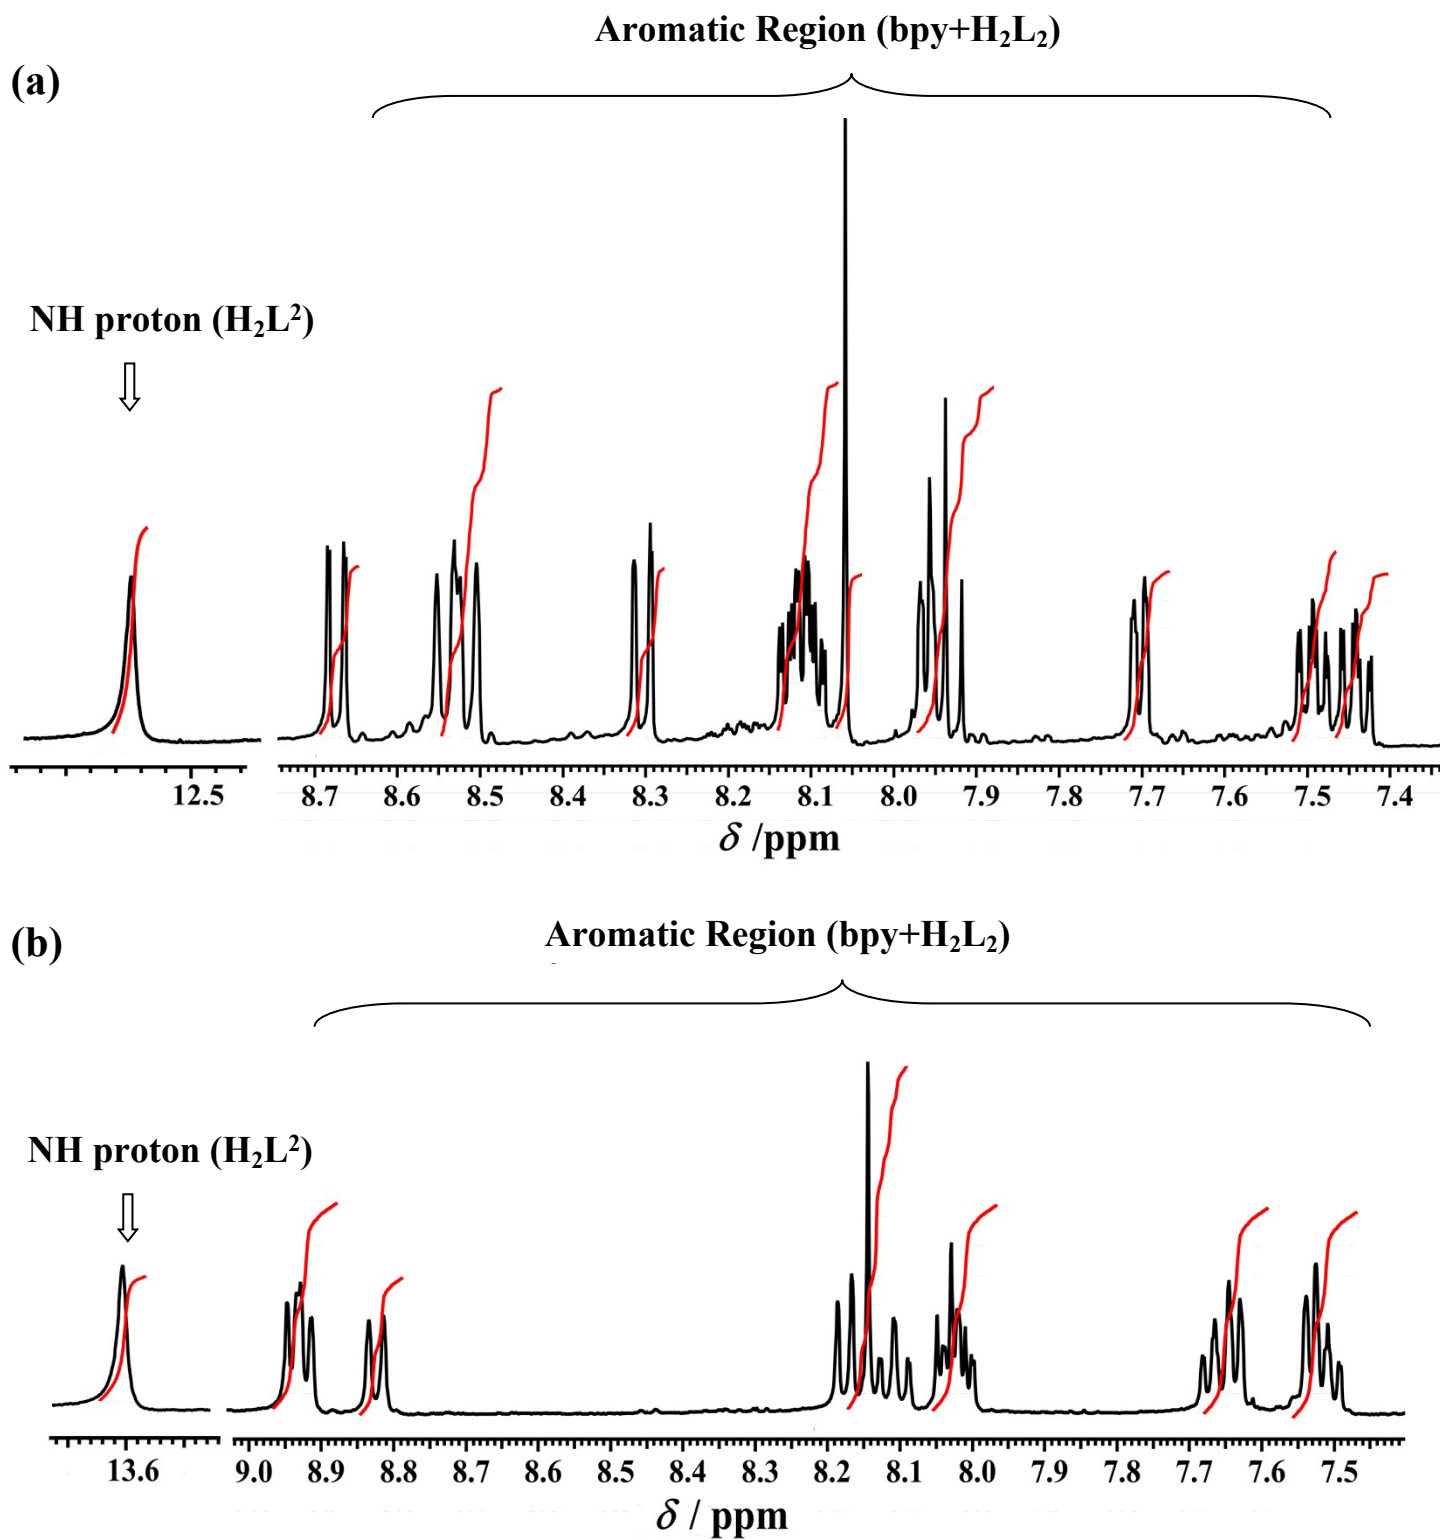

**Fig. S3** <sup>1</sup>H NMR spectra of (a) [3](ClO<sub>4</sub>)<sub>2</sub> in CD<sub>3</sub>CN and (b) [4](ClO<sub>4</sub>)<sub>2</sub> in (CD<sub>3</sub>)<sub>2</sub>SO.

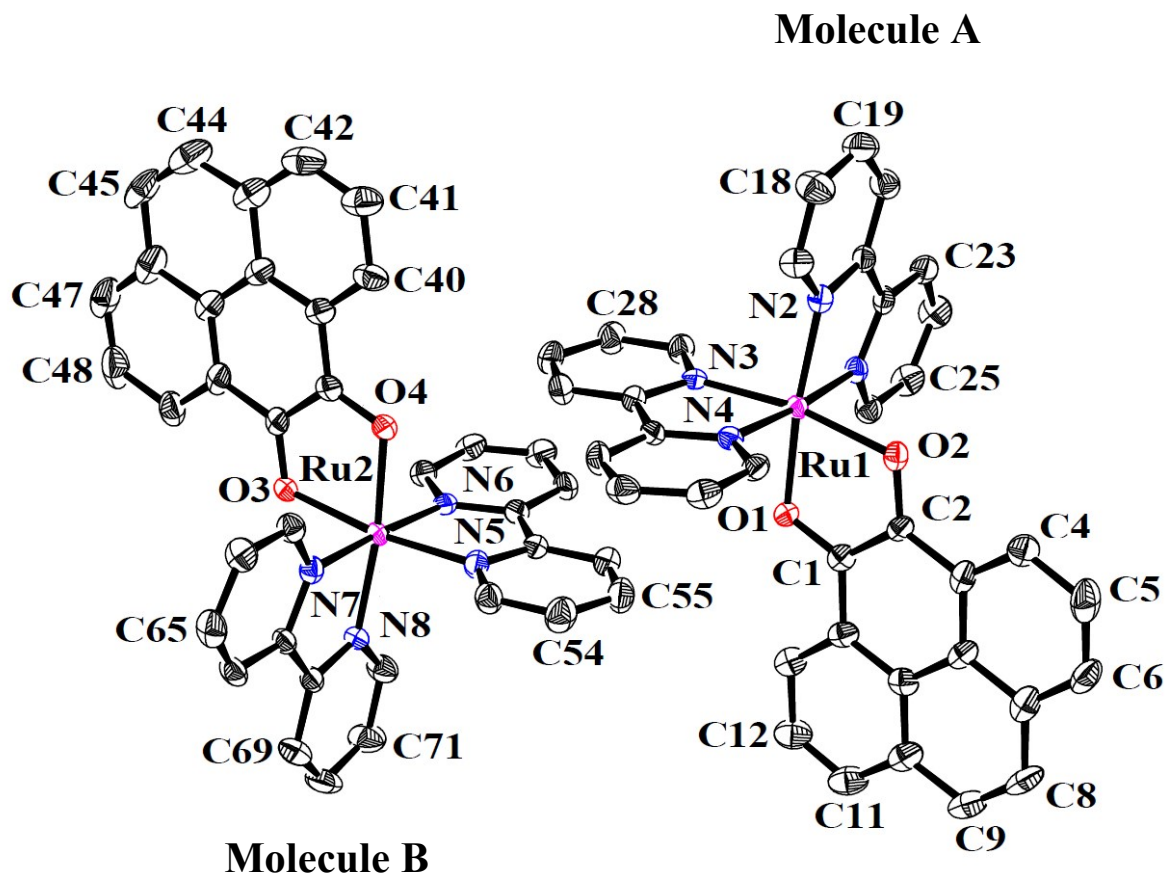

**Fig. S4** Molecular structure of  $[1]ClO_4$  showing two molecules (**molecule A** and **molecule B**) in the asymmetric unit. Ellipsoids are drawn at 50% probability level. Hydrogen atoms and solvent molecules are omitted for clarity.

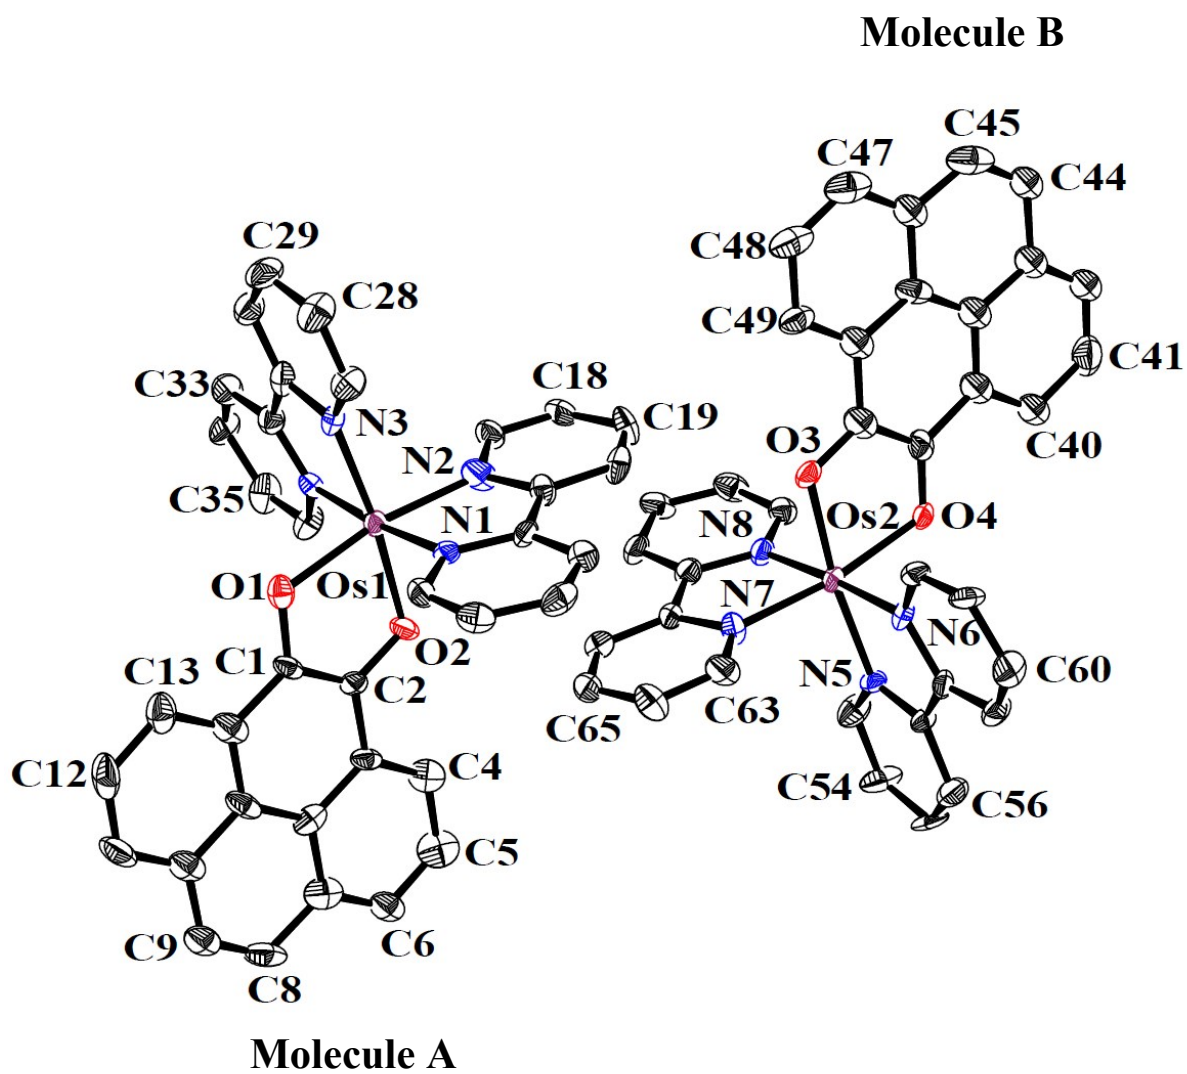

**Fig. S5** Molecular structure of  $[2]ClO_4$  showing two molecules (**molecule A** and **molecule B**) in the asymmetric unit. Ellipsoids are drawn at 50% probability level. Hydrogen atoms and solvent molecules are omitted for clarity.

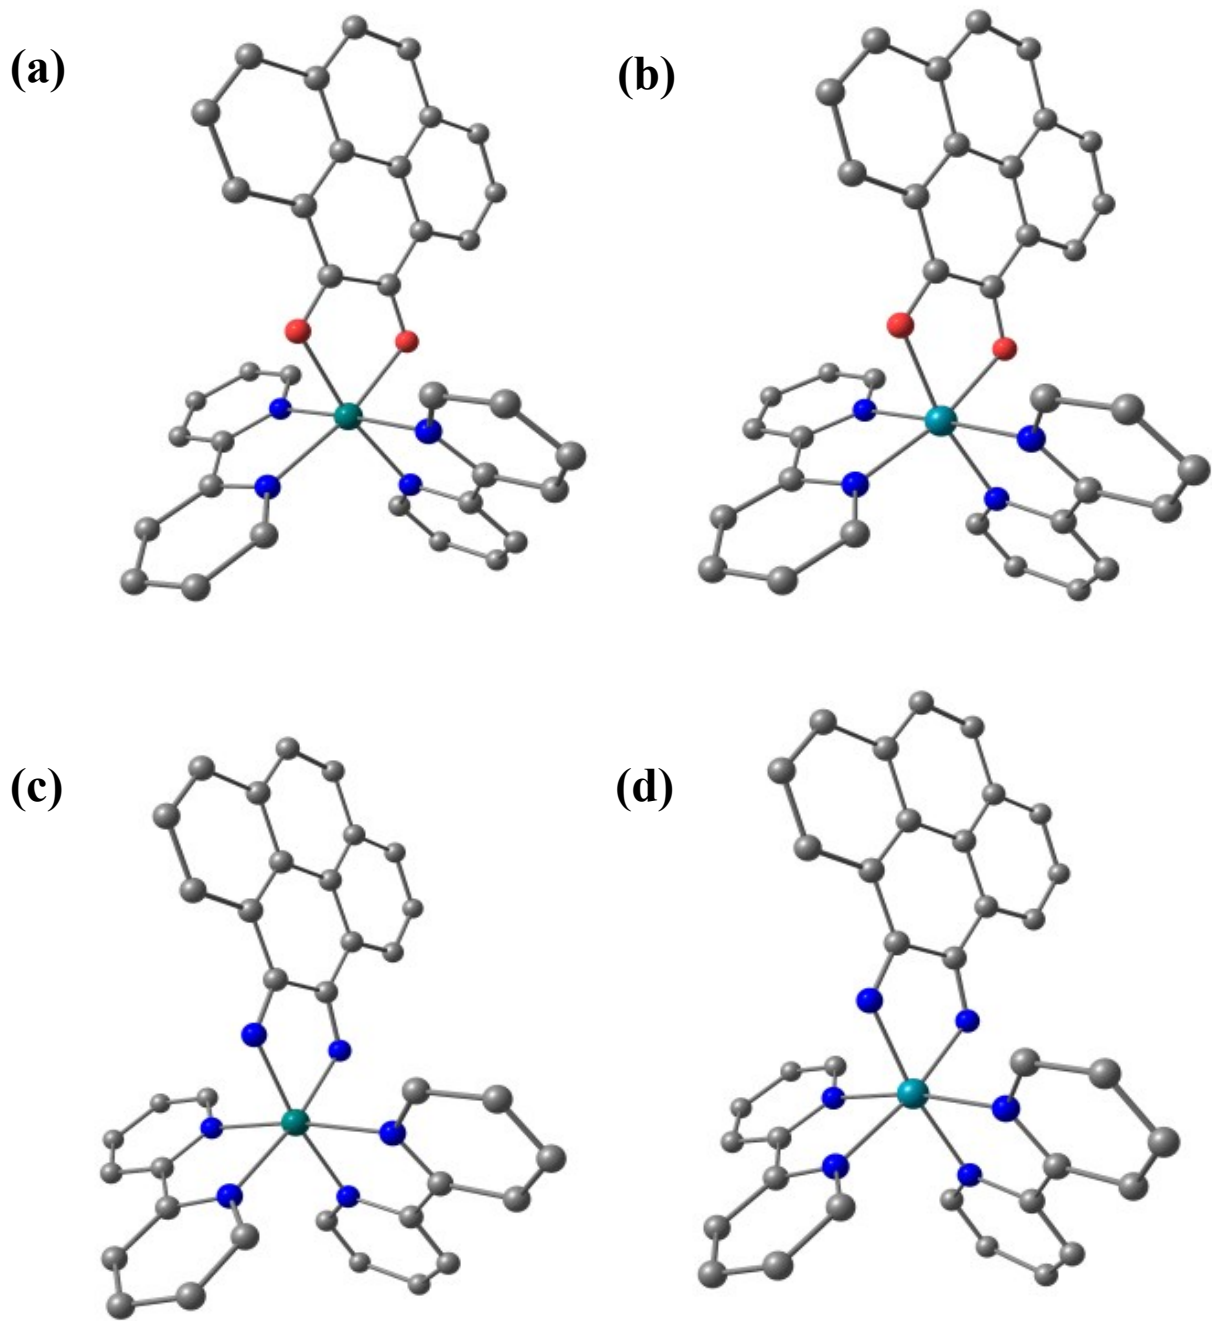

**Fig. S6** DFT (M06L/LANL2DZ/6-31G\*) optimised structure of (a)  $1^+$ , (b)  $2^+$ , (c)  $3^{2+}$  and (d)  $4^{2+}$ .

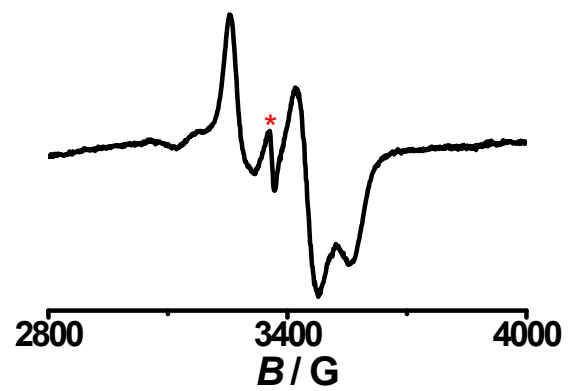

**Fig. S7** EPR spectrum of  $[4](\text{ClO}_4)_2$  after *in situ* reduction at 4.5 K in  $\text{CH}_3\text{CN}/0.1 \text{ M Bu}_4\text{NClO}_4$ .

\*Signal from cavity.



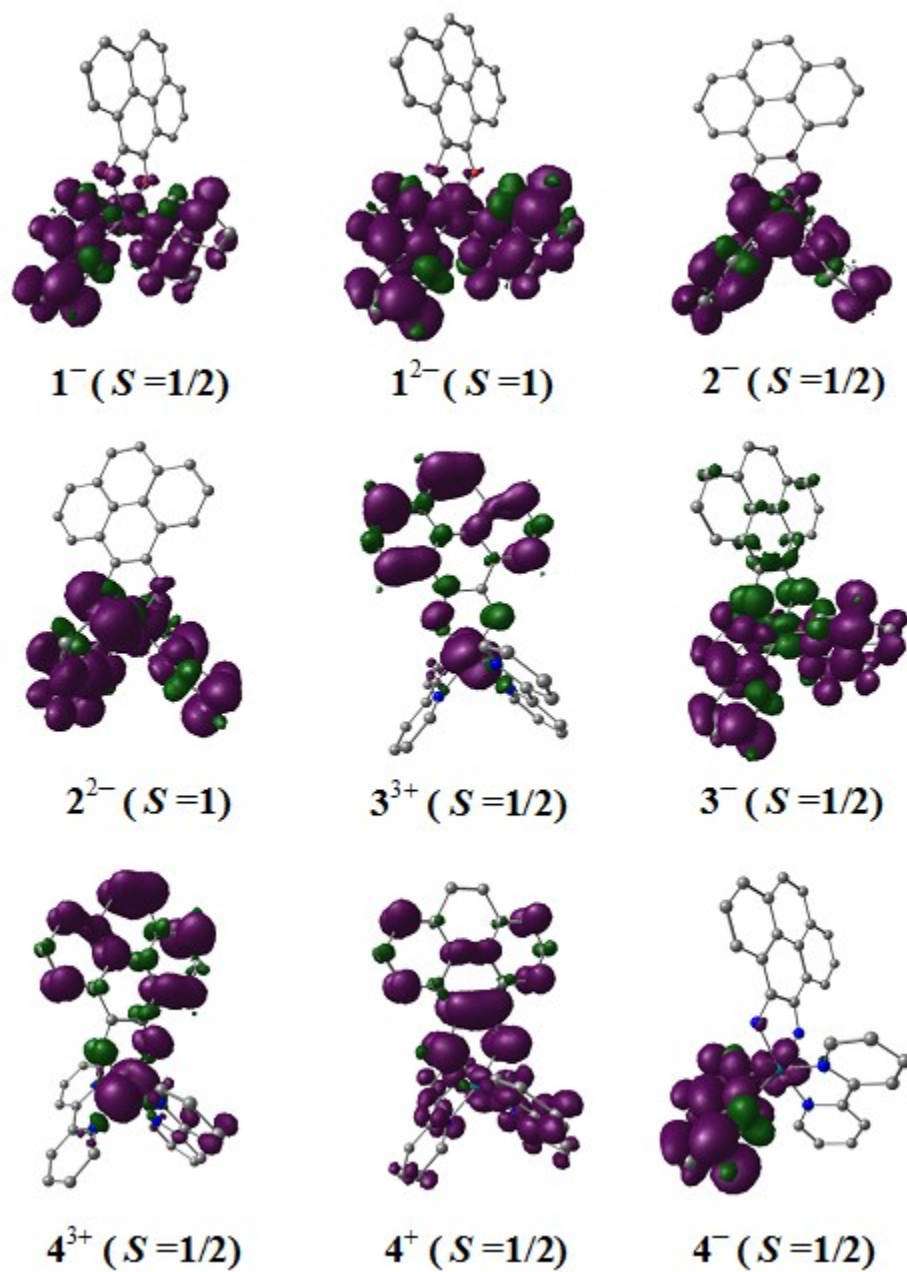

**Fig. S8** DFT calculated Mulliken spin density plots.

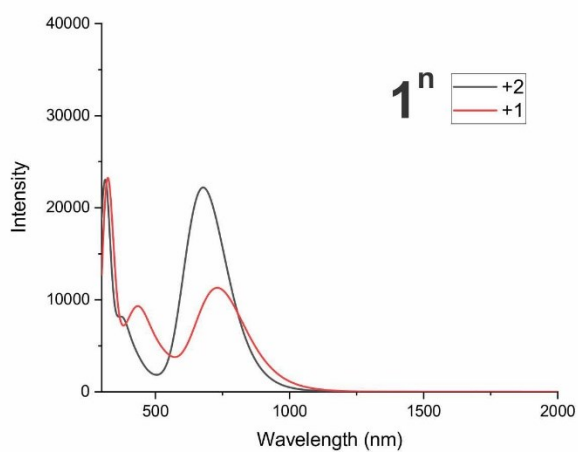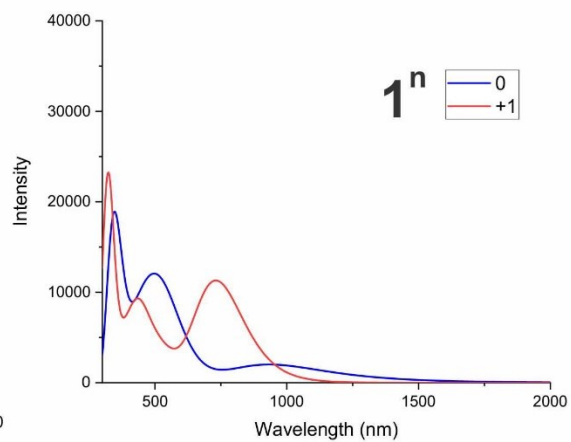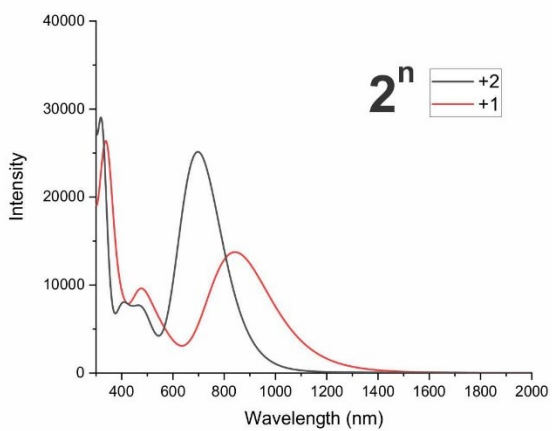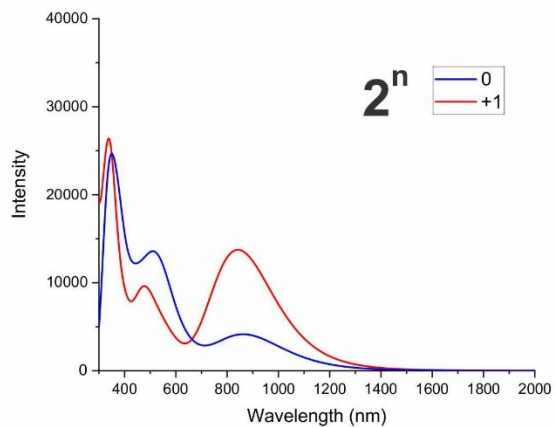

**Fig. S9** TD-DFT simulated electronic spectra of redox series of complexes  $1^n$  and  $2^n$ .

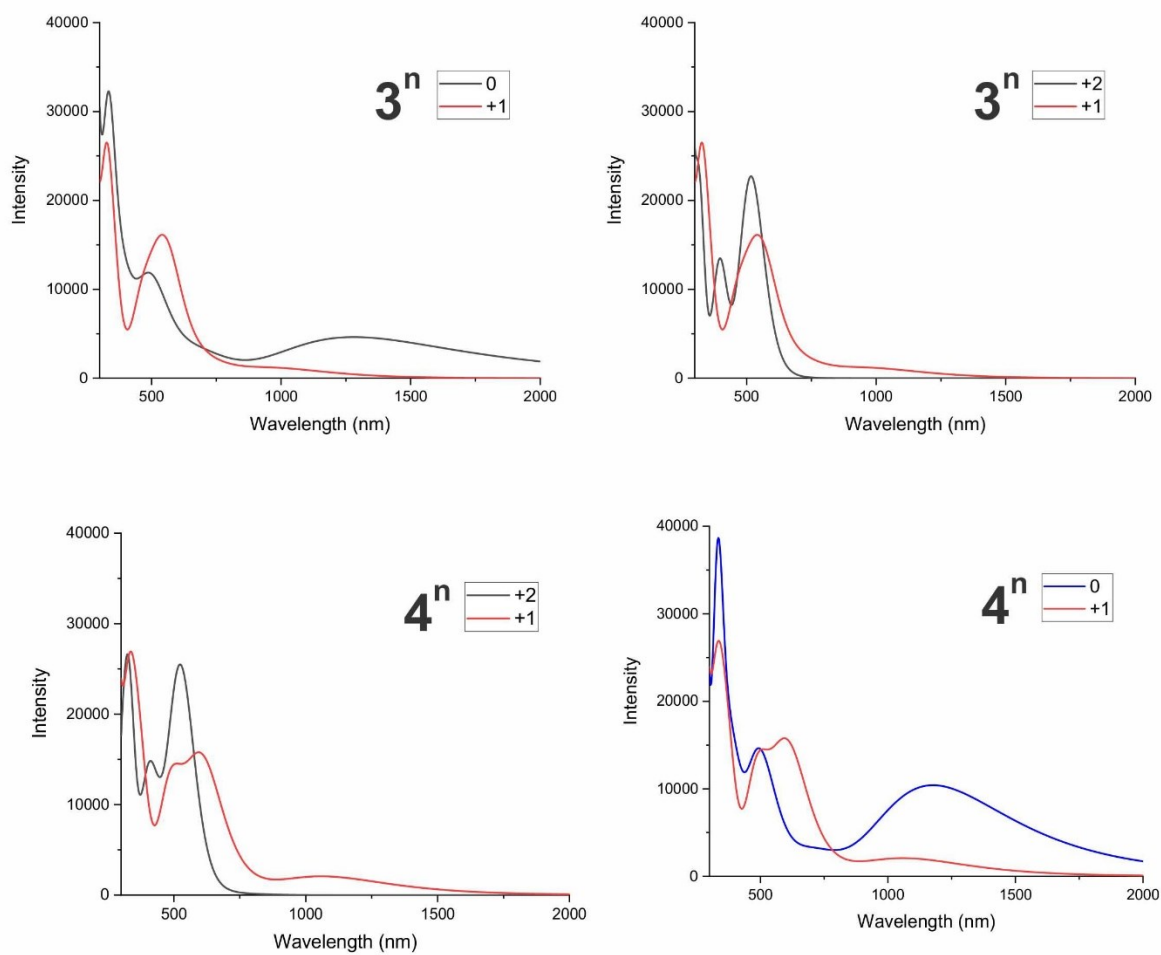

**Fig. S10** TD-DFT simulated electronic spectra of redox series of complexes  $3^n$  and  $4^n$ .

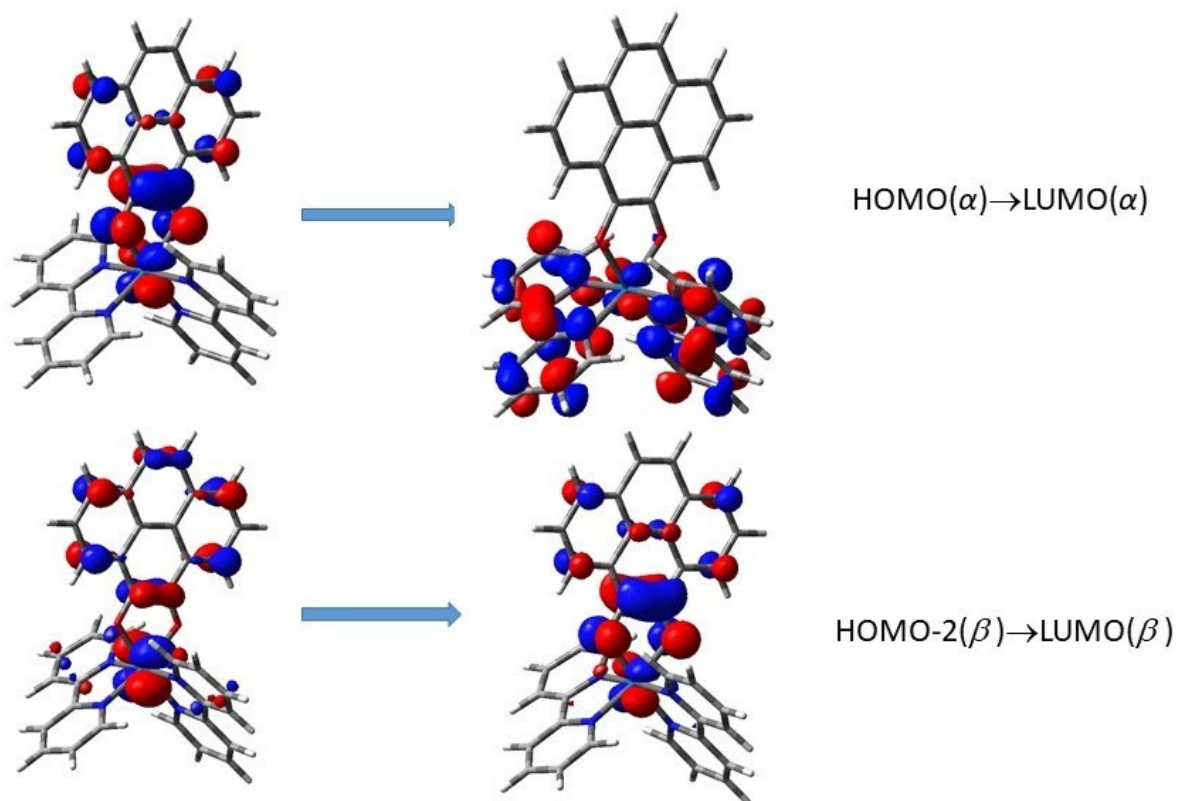

**Fig. S11** Excitations assigned to the intense band around 900 nm of  $2^+$ .

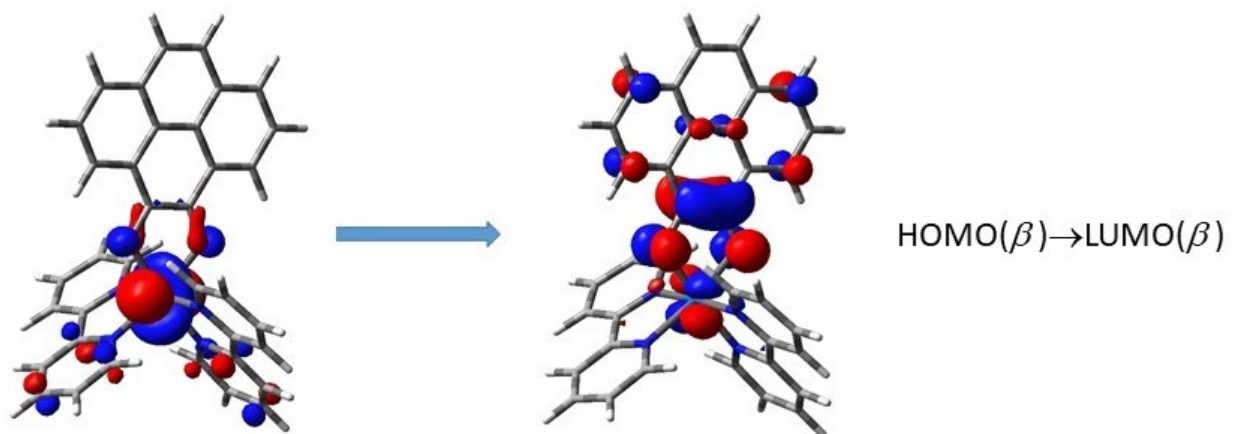

**Fig. S12** Excitation assigned to the intense band around 1600 nm of  $2^+$ .

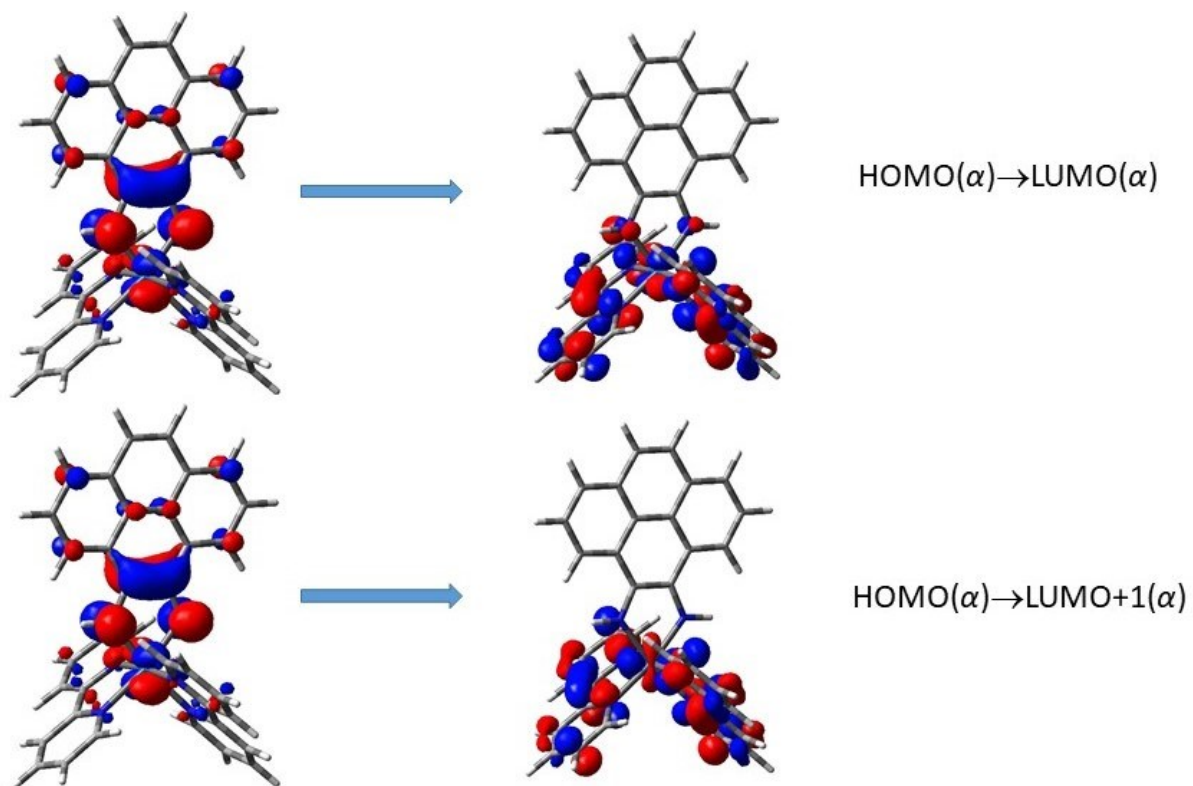

**Fig. S13** Excitation assigned to NIR bands between 900 and 1200 nm of  $4^+$ .

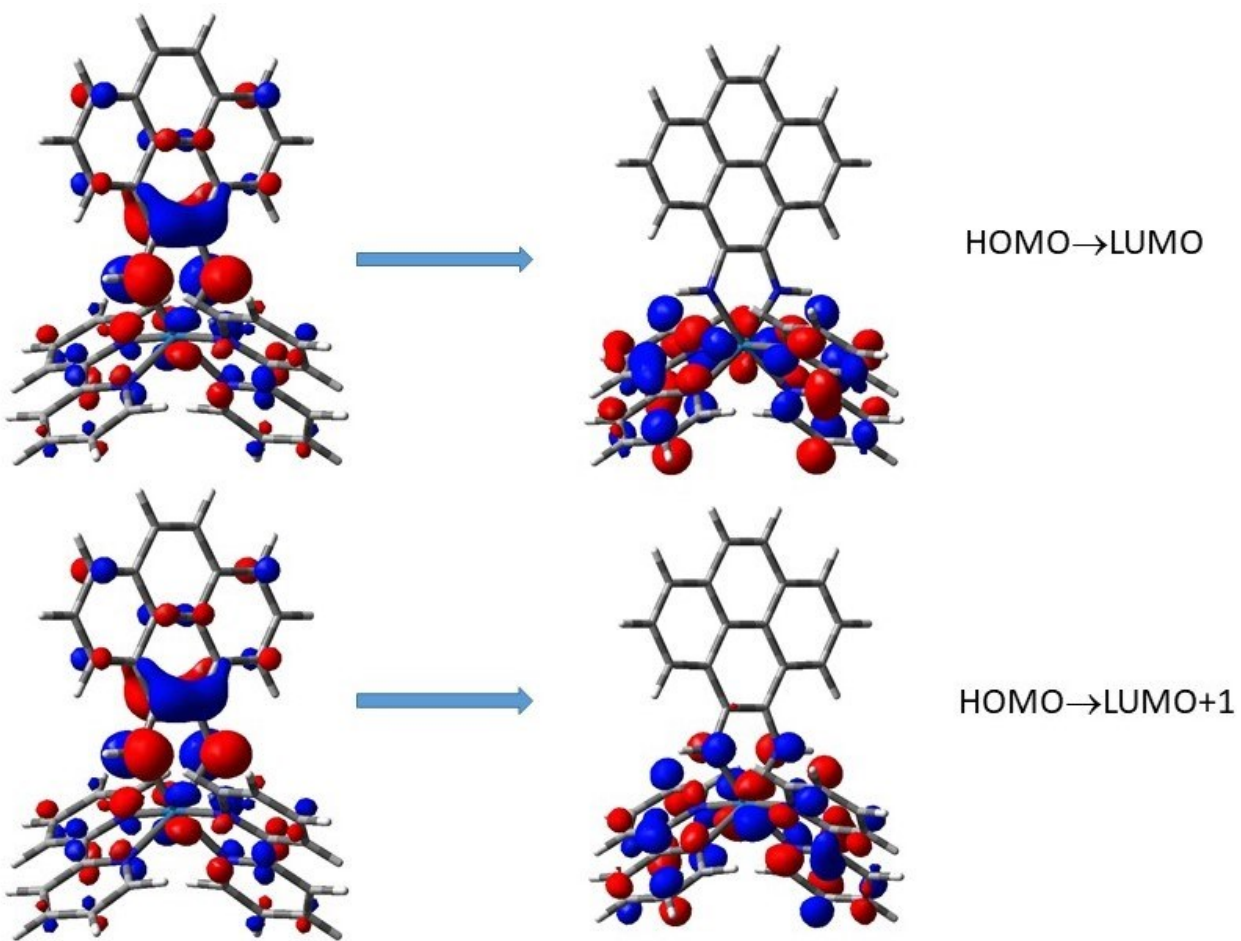

**Fig. S14** Excitation assigned to NIR bands between 900 and 1200 nm of **4**.

**Table S1** Selected crystallographic data

|                                                                              |                                                                                                |                                                                                                |                                                                                  |                                                                                  |
|------------------------------------------------------------------------------|------------------------------------------------------------------------------------------------|------------------------------------------------------------------------------------------------|----------------------------------------------------------------------------------|----------------------------------------------------------------------------------|
| complex                                                                      | 2×[1]ClO <sub>4</sub> ·4C <sub>6</sub> H <sub>6</sub>                                          | 2×[2]ClO <sub>4</sub> ·C <sub>6</sub> H <sub>6</sub>                                           | [3](ClO <sub>4</sub> ) <sub>2</sub>                                              | [4](ClO <sub>4</sub> ) <sub>2</sub>                                              |
| empirical formula                                                            | C <sub>96</sub> H <sub>72</sub> N <sub>8</sub> O <sub>12</sub> Cl <sub>2</sub> Ru <sub>2</sub> | C <sub>78</sub> H <sub>54</sub> N <sub>8</sub> O <sub>12</sub> Cl <sub>2</sub> Os <sub>2</sub> | C <sub>36</sub> H <sub>26</sub> N <sub>6</sub> O <sub>8</sub> Cl <sub>2</sub> Ru | C <sub>36</sub> H <sub>26</sub> N <sub>6</sub> O <sub>8</sub> Cl <sub>2</sub> Os |
| formula weight                                                               | 1802.65                                                                                        | 1746.59                                                                                        | 842.61                                                                           | 931.73                                                                           |
| crystal system                                                               | monoclinic                                                                                     | monoclinic                                                                                     | monoclinic                                                                       | monoclinic                                                                       |
| space group                                                                  | <i>P2<sub>1</sub>/c</i>                                                                        | <i>P2<sub>1</sub>/c</i>                                                                        | <i>P2<sub>1</sub>/n</i>                                                          | <i>P2<sub>1</sub>/n</i>                                                          |
| <i>a</i> (Å)                                                                 | 16.1871(4)                                                                                     | 16.2362(2)                                                                                     | 9.7428(4)                                                                        | 9.7560(2)                                                                        |
| <i>b</i> (Å)                                                                 | 25.7337(6)                                                                                     | 25.7702(4)                                                                                     | 16.1774(8)                                                                       | 16.2063(4)                                                                       |
| <i>c</i> (Å)                                                                 | 19.8582(5)                                                                                     | 19.8131(3)                                                                                     | 20.8421(9)                                                                       | 20.8243(4)                                                                       |
| $\alpha$ (deg)                                                               | 90                                                                                             | 90                                                                                             | 90                                                                               | 90                                                                               |
| $\beta$ (deg)                                                                | 92.578(2)                                                                                      | 92.6620(10)                                                                                    | 96.022(4)                                                                        | 95.821(2)                                                                        |
| $\gamma$ (deg)                                                               | 90                                                                                             | 90                                                                                             | 90                                                                               | 90                                                                               |
| <i>V</i> (Å <sup>3</sup> )                                                   | 8263.6(3)                                                                                      | 8281.1(2)                                                                                      | 3266.9(3)                                                                        | 3275.52(13)                                                                      |
| <i>Z</i>                                                                     | 4                                                                                              | 4                                                                                              | 4                                                                                | 4                                                                                |
| $\mu$ (mm <sup>-1</sup> )                                                    | 0.500                                                                                          | 3.190                                                                                          | 0.711                                                                            | 4.123                                                                            |
| <i>T</i> (K)                                                                 | 150(2)                                                                                         | 150(2)                                                                                         | 150(2)                                                                           | 150(2)                                                                           |
| <i>D</i> <sub>calcd</sub> (g cm <sup>-3</sup> )                              | 1.449                                                                                          | 1.401                                                                                          | 1.7131                                                                           | 1.889                                                                            |
| <i>F</i> (000)                                                               | 3688                                                                                           | 3440                                                                                           | 1700                                                                             | 1832                                                                             |
| $\theta$ range (deg)                                                         | 1.886 to 25.00                                                                                 | 1.886 to 25.00                                                                                 | 1.97 to 25.00                                                                    | 1.966 to 25.00                                                                   |
| data/restraints/parameters                                                   | 14533/0/1081                                                                                   | 14538/0/835                                                                                    | 5731/0/486                                                                       | 5769/0/478                                                                       |
| <i>R</i> <sub>1</sub> , w <i>R</i> <sub>2</sub> [ <i>I</i> > 2σ( <i>I</i> )] | 0.0673, 0.1411                                                                                 | 0.0669, 0.1465                                                                                 | 0.0484, 0.1087                                                                   | 0.0327, 0.0760                                                                   |
| <i>R</i> <sub>1</sub> , w <i>R</i> <sub>2</sub> (all data)                   | 0.0777, 0.1465                                                                                 | 0.0746, 0.1496                                                                                 | 0.0688, 0.1225                                                                   | 0.0426, 0.1039                                                                   |
| GOF                                                                          | 1.225                                                                                          | 1.311                                                                                          | 1.0491                                                                           | 1.155                                                                            |
| largest diff. peak/hole, (e Å <sup>-3</sup> )                                | 0.915/-0.842                                                                                   | 2.015/-2.837                                                                                   | 0.8929/-1.2679                                                                   | 0.798/-0.868                                                                     |

**Table S2** Selected experimental and DFT (M06L) calculated bond lengths (Å) for **1<sup>n</sup>** (molecule

A)

| bond lengths (Å) | X-ray                | DFT                          |                             |                |                              |                             |
|------------------|----------------------|------------------------------|-----------------------------|----------------|------------------------------|-----------------------------|
|                  | <b>1<sup>+</sup></b> | <b>1<sup>+</sup> (S=1/2)</b> | <b>1<sup>2+</sup> (S=0)</b> | <b>1 (S=0)</b> | <b>1<sup>-</sup> (S=1/2)</b> | <b>1<sup>2-</sup> (S=1)</b> |
| Ru1-O1           | 2.051(4)             | 2.096                        | 2.108                       | 2.070          | 2.091                        | 2.134                       |
| Ru1-O2           | 2.078(3)             | 2.094                        | 2.112                       | 2.062          | 2.104                        | 2.132                       |
| Ru1-N2           | 2.028(4)             | 2.071                        | 2.074                       | 2.073          | 2.072                        | 2.077                       |
| Ru1-N1           | 2.048(4)             | 2.078                        | 2.097                       | 2.058          | 2.074                        | 2.079                       |
| Ru1-N3           | 2.024(4)             | 2.072                        | 2.071                       | 2.067          | 2.060                        | 2.078                       |
| Ru1-N4           | 2.046(4)             | 2.076                        | 2.099                       | 2.066          | 2.059                        | 2.079                       |
| O1-C1            | 1.298(6)             | 1.301                        | 1.270                       | 1.328          | 1.327                        | 1.315                       |
| O2-C2            | 1.311(6)             | 1.301                        | 1.270                       | 1.329          | 1.325                        | 1.315                       |
| C2-C1            | 1.420(7)             | 1.433                        | 1.482                       | 1.401          | 1.404                        | 1.417                       |
| C2-C3            | 1.443(7)             | 1.439                        | 1.435                       | 1.434          | 1.433                        | 1.434                       |
| C14-C1           | 1.452(7)             | 1.439                        | 1.434                       | 1.436          | 1.433                        | 1.434                       |



**Table S3** Selected bond lengths (Å) for [1]ClO<sub>4</sub>

| bond lengths (Å) | [1]ClO <sub>4</sub><br>(molecule <b>A</b> ) | bond lengths (Å) | [1]ClO <sub>4</sub><br>(molecule <b>B</b> ) |
|------------------|---------------------------------------------|------------------|---------------------------------------------|
|                  | X-ray                                       |                  | X-ray                                       |
| Ru1-O1           | 2.051(4)                                    | Ru2-O3           | 2.073(3)                                    |
| Ru1-O2           | 2.078(3)                                    | Ru2-O4           | 2.052(4)                                    |
| Ru1-N2           | 2.028(4)                                    | Ru2-N5           | 2.026(4)                                    |
| Ru1-N1           | 2.048(4)                                    | Ru2-N6           | 2.049(4)                                    |
| Ru1-N3           | 2.024(4)                                    | Ru2-N7           | 2.047(4)                                    |
| Ru1-N4           | 2.046(4)                                    | Ru2-N8           | 2.027(4)                                    |
| O1-C1            | 1.298(6)                                    | O3-C37           | 1.294(6)                                    |
| O2-C2            | 1.311(6)                                    | O4-C38           | 1.293(6)                                    |
| C2-C1            | 1.420(7)                                    | C37-C38          | 1.426(8)                                    |
| C2-C3            | 1.443(7)                                    | C37-C50          | 1.449(7)                                    |
| C14-C1           | 1.452(7)                                    | C38-C39          | 1.451(8)                                    |

**Table S4** Selected experimental and DFT (M06L) calculated bond lengths (Å) for **2<sup>n</sup>** (molecule

A)

| bond lengths (Å) | X-ray                | DFT                          |                             |                |                              |                             |
|------------------|----------------------|------------------------------|-----------------------------|----------------|------------------------------|-----------------------------|
|                  | <b>2<sup>+</sup></b> | <b>2<sup>+</sup> (S=1/2)</b> | <b>2<sup>2+</sup> (S=0)</b> | <b>2 (S=0)</b> | <b>2<sup>-</sup> (S=1/2)</b> | <b>2<sup>2-</sup> (S=1)</b> |
| Os1-O1           | 2.062(7)             | 2.091                        | 2.092                       | 2.062          | 2.107                        | 2.132                       |
| Os1-O2           | 2.051(7)             | 2.095                        | 2.089                       | 2.071          | 2.096                        | 2.128                       |
| Os1-N2           | 2.031(10)            | 2.042                        | 2.057                       | 2.033          | 2.025                        | 2.046                       |
| Os1-N1           | 2.053(8)             | 2.062                        | 2.086                       | 2.052          | 2.046                        | 2.062                       |
| Os1-N3           | 2.015(8)             | 2.041                        | 2.058                       | 2.036          | 2.035                        | 2.047                       |
| Os1-N4           | 2.064(8)             | 2.064                        | 2.084                       | 2.044          | 2.061                        | 2.063                       |
| O1-C1            | 1.351(12)            | 1.305                        | 1.280                       | 1.333          | 1.327                        | 1.319                       |
| O2-C2            | 1.304(12)            | 1.305                        | 1.280                       | 1.332          | 1.330                        | 1.318                       |
| C2-C1            | 1.381(15)            | 1.427                        | 1.465                       | 1.395          | 1.399                        | 1.412                       |
| C2-C3            | 1.447(14)            | 1.436                        | 1.430                       | 1.433          | 1.430                        | 1.430                       |
| C14-C1           | 1.446(14)            | 1.435                        | 1.430                       | 1.431          | 1.431                        | 1.430                       |

**Table S5** Selected bond lengths (Å) for [2]ClO<sub>4</sub>

| bond<br>lengths (Å) | [2]ClO <sub>4</sub><br>(molecule A) | bond<br>lengths (Å) | [2]ClO <sub>4</sub><br>(molecule B) |
|---------------------|-------------------------------------|---------------------|-------------------------------------|
|                     | X-ray                               |                     | X-ray                               |
| Os1-O1              | 2.062(7)                            | Os2-O3              | 2.043(7)                            |
| Os1-O2              | 2.051(7)                            | Os2-O4              | 2.066(7)                            |
| Os1-N2              | 2.031(10)                           | Os2-N5              | 2.042(8)                            |
| Os1-N1              | 2.053(8)                            | Os2-N6              | 2.043(8)                            |
| Os1-N3              | 2.015(8)                            | Os2-N7              | 2.033(8)                            |
| Os1-N4              | 2.064(8)                            | Os2-N8              | 2.044(8)                            |
| O1-C1               | 1.351(12)                           | O3-C37              | 1.306(13)                           |
| O2-C2               | 1.304(12)                           | O4-C38              | 1.307(12)                           |
| C2-C1               | 1.381(15)                           | C37-C38             | 1.404(16)                           |
| C2-C3               | 1.447(14)                           | C37-C50             | 1.471(17)                           |
| C14-C1              | 1.446(14)                           | C38-C39             | 1.457(15)                           |

**Table S6** Selected experimental and DFT (M06L) calculated bond lengths (Å) for **3<sup>n</sup>**

| bond lengths (Å) | X-ray                 | DFT                         |                               |                              |                |                              |                             |
|------------------|-----------------------|-----------------------------|-------------------------------|------------------------------|----------------|------------------------------|-----------------------------|
|                  | <b>3<sup>2+</sup></b> | <b>3<sup>2+</sup> (S=0)</b> | <b>3<sup>3+</sup> (S=1/2)</b> | <b>3<sup>+</sup> (S=1/2)</b> | <b>3 (S=0)</b> | <b>3<sup>-</sup> (S=1/2)</b> | <b>3<sup>2-</sup> (S=1)</b> |
| Ru1-N1           | 2.001(4)              | 2.060                       | 2.076                         | 2.064                        | 2.043          | 2.056                        | 2.091                       |
| Ru1-N2           | 2.012(4)              | 2.057                       | 2.029                         | 2.063                        | 2.051          | 2.060                        | 2.095                       |
| Ru1-N3           | 2.071(3)              | 2.121                       | 2.120                         | 2.113                        | 2.106          | 2.105                        | 2.115                       |
| Ru1-N4           | 2.050(3)              | 2.107                       | 2.105                         | 2.088                        | 2.079          | 2.076                        | 2.092                       |
| Ru1-N5           | 2.081(4)              | 2.122                       | 2.139                         | 2.116                        | 2.119          | 2.127                        | 2.122                       |
| Ru1-N6           | 2.057(3)              | 2.108                       | 2.123                         | 2.088                        | 2.076          | 2.094                        | 2.090                       |
| N1-C1            | 1.303(6)              | 1.317                       | 1.313                         | 1.341                        | 1.352          | 1.352                        | 1.355                       |
| N2-C2            | 1.313(5)              | 1.316                       | 1.325                         | 1.340                        | 1.354          | 1.352                        | 1.359                       |
| C2-C1            | 1.458(6)              | 1.468                       | 1.472                         | 1.433                        | 1.421          | 1.427                        | 1.430                       |
| C2-C3            | 1.454(6)              | 1.446                       | 1.438                         | 1.444                        | 1.437          | 1.435                        | 1.429                       |
| C14-C1           | 1.460(6)              | 1.446                       | 1.449                         | 1.444                        | 1.438          | 1.435                        | 1.432                       |
| N1-H1            | 0.83(5)               | 1.019                       | 1.019                         | 1.015                        | 1.015          | 1.015                        | 1.014                       |
| N2-H2            | 0.81(4)               | 1.019                       | 1.020                         | 1.015                        | 1.015          | 1.015                        | 1.015                       |

**Table S7** Selected experimental and DFT (M06L) calculated bond lengths (Å) for **4<sup>n</sup>**

| bond lengths (Å) | X-ray                 | DFT                        |                              |                             |               |                             |                            |
|------------------|-----------------------|----------------------------|------------------------------|-----------------------------|---------------|-----------------------------|----------------------------|
|                  | <b>4<sup>2+</sup></b> | <b>4<sup>2+</sup>(S=0)</b> | <b>4<sup>3+</sup>(S=1/2)</b> | <b>4<sup>+</sup>(S=1/2)</b> | <b>4(S=0)</b> | <b>4<sup>-</sup>(S=1/2)</b> | <b>4<sup>2-</sup>(S=1)</b> |
| Os1-N1           | 2.008(5)              | 2.041                      | 2.007                        | 2.054                       | 2.047         | 2.047                       | 2.085                      |
| Os1-N2           | 2.018(5)              | 2.043                      | 2.058                        | 2.053                       | 2.036         | 2.049                       | 2.077                      |
| Os1-N3           | 2.092(5)              | 2.112                      | 2.134                        | 2.097                       | 2.091         | 2.112                       | 2.096                      |
| Os1-N4           | 2.049(5)              | 2.092                      | 2.112                        | 2.072                       | 2.057         | 2.106                       | 2.071                      |
| Os1-N5           | 2.080(5)              | 2.111                      | 2.117                        | 2.094                       | 2.082         | 2.055                       | 2.093                      |
| Os1-N6           | 2.065(5)              | 2.091                      | 2.094                        | 2.073                       | 2.066         | 2.031                       | 2.076                      |
| N1-C1            | 1.310(8)              | 1.325                      | 1.337                        | 1.343                       | 1.355         | 1.358                       | 1.358                      |
| N2-C2            | 1.312(7)              | 1.325                      | 1.322                        | 1.344                       | 1.357         | 1.358                       | 1.357                      |
| C2-C1            | 1.454(8)              | 1.455                      | 1.460                        | 1.428                       | 1.416         | 1.420                       | 1.428                      |
| C2-C3            | 1.463(8)              | 1.443                      | 1.443                        | 1.441                       | 1.435         | 1.431                       | 1.428                      |
| C14-C1           | 1.456(8)              | 1.442                      | 1.431                        | 1.442                       | 1.436         | 1.433                       | 1.428                      |
| N1-H1            | 0.880(3)              | 1.019                      | 1.020                        | 1.016                       | 1.014         | 1.015                       | 1.014                      |
| N2-H2            | 0.881(4)              | 1.019                      | 1.020                        | 1.016                       | 1.014         | 1.015                       | 1.014                      |

**Table S8** Selected experimental and DFT (M06L) calculated bond angles (deg) for **1<sup>n</sup>** (molecule

A)

| bond<br>angle (deg) | X-ray                | DFT                          |                             |                |                              |                             |
|---------------------|----------------------|------------------------------|-----------------------------|----------------|------------------------------|-----------------------------|
|                     | <b>1<sup>+</sup></b> | <b>1<sup>+</sup> (S=1/2)</b> | <b>1<sup>2+</sup> (S=0)</b> | <b>1 (S=0)</b> | <b>1<sup>-</sup> (S=1/2)</b> | <b>1<sup>2-</sup> (S=1)</b> |
| O1-Ru1-O2           | 79.88(14)            | 79.251                       | 76.200                      | 81.552         | 80.649                       | 79.737                      |
| N3-Ru1-O2           | 169.52(15)           | 168.922                      | 170.679                     | 168.196        | 169.058                      | 170.577                     |
| N3-Ru1-O1           | 91.75(15)            | 93.454                       | 96.134                      | 91.931         | 93.578                       | 95.660                      |
| N3-Ru1-N1           | 97.20(16)            | 99.834                       | 97.356                      | 100.028        | 96.753                       | 97.391                      |
| N3-Ru1-N2           | 92.57(17)            | 94.104                       | 90.911                      | 97.584         | 92.833                       | 90.289                      |
| N3-Ru1-N4           | 79.46(16)            | 78.097                       | 78.052                      | 78.270         | 78.904                       | 78.956                      |
| N1-Ru1-O2           | 89.81(14)            | 89.133                       | 88.905                      | 90.241         | 92.789                       | 91.042                      |
| N1-Ru1-O1           | 94.61(15)            | 94.585                       | 96.728                      | 93.573         | 92.388                       | 92.316                      |
| N2-Ru1-O2           | 96.42(15)            | 94.117                       | 97.168                      | 90.188         | 94.320                       | 95.449                      |
| N2-Ru1-O1           | 172.77(15)           | 170.226                      | 171.687                     | 168.241        | 169.358                      | 170.151                     |
| N2-Ru1-N1           | 79.11(17)            | 78.020                       | 77.938                      | 78.021         | 78.420                       | 79.109                      |
| N2-Ru1-N4           | 97.71(16)            | 99.774                       | 97.344                      | 101.346        | 98.044                       | 97.186                      |
| N4-Ru1-O2           | 93.96(15)            | 93.190                       | 96.235                      | 91.535         | 91.892                       | 92.885                      |
| N4-Ru1-O1           | 88.77(15)            | 87.845                       | 88.453                      | 87.305         | 91.523                       | 91.665                      |
| N4-Ru1-N1           | 175.34(17)           | 176.917                      | 173.456                     | 178.118        | 174.333                      | 174.848                     |

**Table S9** Selected bond angles (deg) for [1]ClO<sub>4</sub>

| bond<br>angle (deg) | [1]ClO <sub>4</sub><br>(molecule A) | bond<br>angle (deg) | [1]ClO <sub>4</sub><br>(molecule B) |
|---------------------|-------------------------------------|---------------------|-------------------------------------|
|                     | X-ray                               |                     | X-ray                               |
| O1-Ru1-O2           | 79.88(14)                           | O4-Ru2-O3           | 79.96(14)                           |
| N3-Ru1-O2           | 169.52(15)                          | N6-Ru2-O3           | 94.28(15)                           |
| N3-Ru1-O1           | 91.75(15)                           | N6-Ru2-O4           | 87.74(15)                           |
| N3-Ru1-N1           | 97.20(16)                           | N8-Ru2-O3           | 96.01(15)                           |
| N3-Ru1-N2           | 92.57(17)                           | N8-Ru2-O4           | 172.02(15)                          |
| N3-Ru1-N4           | 79.46(16)                           | N8-Ru2-N6           | 99.48(17)                           |
| N1-Ru1-O2           | 89.81(14)                           | N8-Ru2-N7           | 79.15(17)                           |
| N1-Ru1-O1           | 94.61(15)                           | N5-Ru2-O3           | 171.08(15)                          |
| N2-Ru1-O2           | 96.42(15)                           | N5-Ru2-O4           | 93.78(16)                           |
| N2-Ru1-O1           | 172.77(15)                          | N5-Ru2-N6           | 79.03(17)                           |
| N2-Ru1-N1           | 79.11(17)                           | N5-Ru2-N8           | 90.95(18)                           |
| N2-Ru1-N4           | 97.71(16)                           | N5-Ru2-N7           | 97.52(17)                           |
| N4-Ru1-O2           | 93.96(15)                           | N7-Ru2-O3           | 89.29(15)                           |
| N4-Ru1-O1           | 88.77(15)                           | N7-Ru2-O4           | 93.84(15)                           |
| N4-Ru1-N1           | 175.34(17)                          | N7-Ru2-N6           | 176.31(16)                          |

**Table S10** Selected experimental and DFT (M06L) calculated bond angles (deg) for **2<sup>n</sup>** (molecule

A)

| bond<br>angle (deg) | X-ray                | DFT                          |                             |                |                              |                             |
|---------------------|----------------------|------------------------------|-----------------------------|----------------|------------------------------|-----------------------------|
|                     | <b>2<sup>+</sup></b> | <b>2<sup>+</sup> (S=1/2)</b> | <b>2<sup>2+</sup> (S=0)</b> | <b>2 (S=0)</b> | <b>2<sup>-</sup> (S=1/2)</b> | <b>2<sup>2-</sup> (S=1)</b> |
| O2-Os1-O1           | 79.2(3)              | 78.074                       | 75.567                      | 80.136         | 79.341                       | 78.834                      |
| O2-Os1-N4           | 95.4(3)              | 94.860                       | 97.028                      | 93.785         | 92.396                       | 92.948                      |
| O2-Os1-N1           | 88.7(3)              | 87.367                       | 88.367                      | 87.284         | 91.047                       | 90.222                      |
| O1-Os1-N4           | 89.7(3)              | 88.696                       | 88.690                      | 90.170         | 92.026                       | 91.054                      |
| N3-Os1-O2           | 172.3(3)             | 169.788                      | 171.482                     | 167.952        | 168.689                      | 170.265                     |
| N3-Os1-O1           | 96.3(3)              | 94.383                       | 97.482                      | 101.196        | 98.495                       | 95.568                      |
| N3-Os1-N4           | 78.2(3)              | 77.936                       | 77.669                      | 77.998         | 78.487                       | 79.100                      |
| N3-Os1-N2           | 92.5(4)              | 94.732                       | 90.699                      | 98.143         | 94.244                       | 91.797                      |
| N3-Os1-N1           | 98.0(3)              | 100.070                      | 97.444                      | 101.196        | 98.495                       | 97.997                      |
| N2-Os1-O2           | 92.7(3)              | 93.652                       | 96.640                      | 91.922         | 93.544                       | 94.872                      |
| N2-Os1-N1           | 78.4(3)              | 78.014                       | 77.744                      | 78.220         | 78.878                       | 79.226                      |
| N1-Os1-O1           | 94.6(3)              | 93.456                       | 96.719                      | 91.643         | 92.156                       | 92.170                      |
| N2-Os1-O2           | 92.7(3)              | 93.652                       | 96.640                      | 91.922         | 91.047                       | 94.872                      |
| N2-Os1-O1           | 169.4(3)             | 168.477                      | 170.696                     | 167.470        | 168.522                      | 169.394                     |
| N2-Os1-N4           | 97.8(3)              | 100.095                      | 97.419                      | 100.080        | 97.301                       | 97.840                      |
| N1-Os1-N4           | 174.6(3)             | 177.184                      | 173.182                     | 178.031        | 175.013                      | 175.862                     |



**Table S11** Selected bond angles (deg) for [2]ClO<sub>4</sub>

| bond<br>angle (deg) | [2]ClO <sub>4</sub><br>(molecule A) | bond<br>angle (deg) | [2]ClO <sub>4</sub><br>(molecule B) |
|---------------------|-------------------------------------|---------------------|-------------------------------------|
|                     | X-ray                               |                     | X-ray                               |
| O2-Os1-O1           | 79.2(3)                             | O4-Os2-O3           | 79.9(3)                             |
| O2-Os1-N4           | 95.4(3)                             | O3-Os2-N8           | 87.7(3)                             |
| O2-Os1-N1           | 88.7(3)                             | O3-Os2-N6           | 94.1(3)                             |
| O1-Os1-N4           | 89.7(3)                             | N8-Os2-O4           | 94.3(3)                             |
| N3-Os1-O2           | 172.3(3)                            | N5-Os2-O3           | 171.4(3)                            |
| N3-Os1-O1           | 96.3(3)                             | N5-Os2-O4           | 95.7(3)                             |
| N3-Os1-N4           | 78.2(3)                             | N5-Os2-N8           | 100.2(3)                            |
| N3-Os1-N2           | 92.5(4)                             | N5-Os2-N6           | 78.3(3)                             |
| N3-Os1-N1           | 98.0(3)                             | N7-Os2-O3           | 93.6(3)                             |
| N2-Os1-O2           | 92.7(3)                             | N7-Os2-O4           | 170.9(3)                            |
| N2-Os1-N1           | 78.4(3)                             | N7-Os2-N8           | 79.0(3)                             |
| N1-Os1-O1           | 94.6(3)                             | N7-Os2-N5           | 91.5(3)                             |
| N2-Os1-O2           | 92.7(3)                             | N7-Os2-N6           | 97.4(3)                             |
| N2-Os1-O1           | 169.4(3)                            | N6-Os2-O4           | 89.4(3)                             |
| N2-Os1-N4           | 97.8(3)                             | N6-Os2-N8           | 176.1(3)                            |

**Table S12** Selected experimental and DFT (M06L) calculated bond angles (deg) for **3<sup>n</sup>**

| bond<br>angle (deg) | X-ray                 | DFT                                     |                                           |                                          |                            |                                          |                                         |
|---------------------|-----------------------|-----------------------------------------|-------------------------------------------|------------------------------------------|----------------------------|------------------------------------------|-----------------------------------------|
|                     | <b>3<sup>2+</sup></b> | <b>3<sup>2+</sup></b><br>( <i>S</i> =0) | <b>3<sup>3+</sup></b><br>( <i>S</i> =1/2) | <b>3<sup>+</sup></b><br>( <i>S</i> =1/2) | <b>3</b><br>( <i>S</i> =0) | <b>3<sup>-</sup></b><br>( <i>S</i> =1/2) | <b>3<sup>2-</sup></b><br>( <i>S</i> =1) |
| N1-Ru1-N2           | 76.30(15)             | 74.910                                  | 75.309                                    | 76.131                                   | 77.034                     | 76.911                                   | 76.121                                  |
| N1-Ru1-N5           | 96.86(15)             | 98.628                                  | 98.966                                    | 97.559                                   | 94.969                     | 96.353                                   | 97.518                                  |
| N1-Ru1-N3           | 170.16(14)            | 171.432                                 | 172.701                                   | 169.179                                  | 167.731                    | 169.029                                  | 169.233                                 |
| N3-Ru1-N5           | 90.87(14)             | 88.740                                  | 87.961                                    | 90.756                                   | 94.512                     | 92.038                                   | 90.409                                  |
| N3-Ru1-N2           | 96.40(14)             | 98.095                                  | 97.913                                    | 96.414                                   | 94.556                     | 95.577                                   | 96.968                                  |
| N5-Ru1-N2           | 171.96(14)            | 171.948                                 | 173.291                                   | 170.546                                  | 168.753                    | 170.208                                  | 169.885                                 |
| N6-Ru1-N2           | 97.59(14)             | 97.920                                  | 99.615                                    | 95.719                                   | 95.216                     | 95.498                                   | 94.265                                  |
| N6-Ru1-N5           | 78.46(14)             | 77.008                                  | 76.470                                    | 77.076                                   | 77.160                     | 77.383                                   | 77.926                                  |
| N6-Ru1-N3           | 93.70(13)             | 96.176                                  | 95.663                                    | 98.440                                   | 96.421                     | 97.380                                   | 96.872                                  |
| N6-Ru1-N1           | 93.81(13)             | 89.773                                  | 88.241                                    | 90.195                                   | 93.265                     | 91.357                                   | 91.924                                  |
| N4-Ru1-N2           | 92.33(14)             | 89.935                                  | 91.162                                    | 89.419                                   | 89.990                     | 89.177                                   | 90.868                                  |
| N4-Ru1-N5           | 92.49(14)             | 95.769                                  | 93.296                                    | 98.205                                   | 98.477                     | 98.461                                   | 97.446                                  |
| N4-Ru1-N3           | 78.41(13)             | 77.075                                  | 77.365                                    | 77.149                                   | 77.377                     | 77.809                                   | 78.051                                  |
| N4 -Ru1-N1          | 95.11(14)             | 97.718                                  | 99.803                                    | 94.740                                   | 93.522                     | 93.926                                   | 93.637                                  |
| N4-Ru1-N6           | 167.99(13)            | 170.349                                 | 167.939                                   | 173.607                                  | 172.230                    | 173.626                                  | 173.200                                 |

**Table S13** Selected experimental and DFT (M06L) calculated bond angles (deg) for **4<sup>n</sup>**

| bond<br>angle (deg) | X-ray                 | DFT                        |                            |                             |               |                             |                            |
|---------------------|-----------------------|----------------------------|----------------------------|-----------------------------|---------------|-----------------------------|----------------------------|
|                     | <b>4<sup>2+</sup></b> | <b>4<sup>2+</sup>(S=0)</b> | <b>4<sup>3+</sup>(S=0)</b> | <b>4<sup>+</sup>(S=1/2)</b> | <b>4(S=0)</b> | <b>4<sup>-</sup>(S=1/2)</b> | <b>4<sup>2-</sup>(S=1)</b> |
| N1-Os1-N2           | 75.72(19)             | 74.603                     | 75.161                     | 75.491                      | 76.243        | 76.684                      | 75.484                     |
| N1-Os1-N5           | 94.4(2)               | 98.646                     | 98.676                     | 97.071                      | 95.114        | 94.537                      | 97.188                     |
| N1-Os1-N6           | 94.4(2)               | 90.451                     | 90.865                     | 89.942                      | 90.206        | 88.533                      | 90.456                     |
| N1-Os1-N4           | 95.4(2)               | 98.014                     | 99.579                     | 95.961                      | 95.530        | 96.204                      | 94.651                     |
| N1-Os1-N3           | 169.91(19)            | 171.832                    | 173.555                    | 170.308                     | 168.494       | 169.740                     | 169.864                    |
| N5-Os1-N3           | 90.59(19)             | 88.195                     | 86.772                     | 90.470                      | 94.470        | 93.899                      | 90.760                     |
| N6-Os1-N5           | 77.67(19)             | 76.765                     | 77.055                     | 76.933                      | 77.111        | 78.320                      | 78.137                     |
| N6-Os1-N3           | 93.6(2)               | 95.485                     | 93.725                     | 97.717                      | 98.133        | 98.894                      | 97.352                     |
| N2-Os1-N5           | 171.3(2)              | 171.473                    | 173.300                    | 169.167                     | 167.532       | 168.685                     | 169.139                    |
| N2-Os1-N6           | 97.79(19)             | 97.824                     | 100.152                    | 94.973                      | 93.742        | 94.143                      | 93.726                     |
| N2-Os1-N4           | 93.05(19)             | 90.293                     | 87.258                     | 90.784                      | 93.430        | 92.354                      | 91.944                     |
| N2-Os1-N3           | 97.08(18)             | 98.970                     | 99.543                     | 97.827                      | 95.216        | 95.616                      | 97.474                     |
| N4-Os1-N5           | 92.48(19)             | 95.881                     | 96.478                     | 97.903                      | 96.376        | 95.726                      | 96.693                     |
| N4-Os1-N6           | 166.9(2)              | 169.590                    | 168.502                    | 172.632                     | 171.713       | 172.702                     | 173.171                    |
| N4-Os1-N3           | 77.7(2)               | 76.727                     | 76.266                     | 76.900                      | 77.072        | 77.135                      | 78.116                     |

**Table S14** Energies of DFT (M06L/LANL2DZ/6-31G\*) optimised structures

| complex  | $E$ (Hartrees) |               | $\Delta E_{(\text{HE-LE})}^a$                                              |
|----------|----------------|---------------|----------------------------------------------------------------------------|
|          | $S = 0$        | $S = 1$       |                                                                            |
| $1^{2+}$ | -1849.1687906  | -1849.1411220 | 0.0276686 Hartrees<br>6072.5557476 $\text{cm}^{-1}$<br>72.643914834 kJ/mol |
| $1$      | -1849.6084753  | -1849.5963629 | 0.0121124 Hartrees<br>2658.3645084 $\text{cm}^{-1}$<br>31.801108622 kJ/mol |
| $1^{2-}$ | -1849.5777020  | -1849.5794476 | 0.0017456 Hartrees<br>383.11491413 $\text{cm}^{-1}$<br>4.5830731491 kJ/mol |
| $2^{2+}$ | -1846.3145693  | -1846.2932997 | 0.0212696 Hartrees<br>4668.1375902 $\text{cm}^{-1}$<br>55.843339054 kJ/mol |
| $2$      | -1846.7619364  | -1846.7451543 | 0.0167821 Hartrees<br>3683.2451881 $\text{cm}^{-1}$<br>44.061406906 kJ/mol |
| $2^{2-}$ | -1846.7285563  | -1846.7257949 | 0.0027614 Hartrees<br>606.05724328 $\text{cm}^{-1}$<br>7.2500562523 kJ/mol |
| $3^{4+}$ | -1808.4684218  | -1808.4789299 | 0.0105081 Hartrees<br>2306.2613595 $\text{cm}^{-1}$<br>27.589018652 kJ/mol |
| $3$      | -1809.8474799  | -1809.8453289 | 0.002151 Hartrees<br>472.0899291 $\text{cm}^{-1}$<br>5.64745093 kJ/mol     |
| $3^{2-}$ | -1809.7982225  | -1809.8057036 | 0.0074811 Hartrees<br>1641.9116545 $\text{cm}^{-1}$<br>19.641629546 kJ/mol |
| $4$      | -1807.0080052  | -1807.0013954 | 0.0066098 Hartrees<br>1450.6834094 $\text{cm}^{-1}$<br>17.354031222 kJ/mol |

<sup>a</sup> HE = Spin state in higher in energy and LE = Spin state in lower in energy.

**Table S15** DFT calculated (M06L/LanL2DZ/6-31G\*) Mulliken spin densities

| complex                                | Ru/Os | L <sup>1</sup> /H <sub>2</sub> L <sup>2</sup> | bpy    |
|----------------------------------------|-------|-----------------------------------------------|--------|
| <b>1<sup>-</sup></b> ( <i>S</i> =1/2)  | 0.039 | 0.037                                         | 0.924  |
| <b>1<sup>2-</sup></b> ( <i>S</i> =1)   | 0.218 | 0.022                                         | 1.762  |
| <b>2<sup>-</sup></b> ( <i>S</i> =1/2)  | 0.101 | 0.057                                         | 0.843  |
| <b>2<sup>2-</sup></b> ( <i>S</i> =1)   | 0.333 | 0.063                                         | 1.603  |
| <b>3<sup>3+</sup></b> ( <i>S</i> =1/2) | 0.489 | 0.517                                         | -0.004 |
| <b>3<sup>-</sup></b> ( <i>S</i> =1/2)  | -0.78 | -0.330                                        | 1.408  |
| <b>3<sup>2-</sup></b> ( <i>S</i> =1)   | 0.258 | 0.057                                         | 1.685  |
| <b>4<sup>3+</sup></b> ( <i>S</i> =1/2) | 0.599 | 0.410                                         | -0.010 |
| <b>4<sup>-</sup></b> ( <i>S</i> =1/2)  | 0.104 | 0.022                                         | 0.874  |
| <b>4<sup>2-</sup></b> ( <i>S</i> =1)   | 0.389 | 0.135                                         | 1.477  |

**Table S16** Experimental and TD-DFT (M06L/CPCM/CH<sub>3</sub>CN) calculated electronic transitionsfor **1<sup>n</sup>**

| $\lambda_{\max}/\text{nm}$<br>(expt.) <sup>a</sup><br>( $\epsilon/\text{dm}^3\text{cm}^{-1}$<br>$\text{mol}^{-1}$ ) <sup>b</sup> | $\lambda/\text{nm}$ (DFT)<br>(f) <sup>c</sup> | transitions                                               | character                                                                                                  |
|----------------------------------------------------------------------------------------------------------------------------------|-----------------------------------------------|-----------------------------------------------------------|------------------------------------------------------------------------------------------------------------|
| <b>1<sup>+</sup> (S=1/2)</b>                                                                                                     |                                               |                                                           |                                                                                                            |
| 904(912)                                                                                                                         | 19200(0.03)                                   | HOMO( $\alpha$ ) $\rightarrow$ LUMO( $\alpha$ )(0.97)     | L <sup>1</sup> ( $\pi$ ) $\rightarrow$ bpy( $\pi^*$ )                                                      |
| 798(837)                                                                                                                         | 11400(0.15)                                   | HOMO-2( $\beta$ ) $\rightarrow$ LUMO( $\beta$ )(0.95)     | Ru(d $\pi$ )/L <sup>1</sup> ( $\pi$ )/bpy( $\pi$ ) $\rightarrow$ L <sup>1</sup> ( $\pi^*$ )/bpy( $\pi^*$ ) |
| 628(617)                                                                                                                         | 4820(0.03)                                    | HOMO( $\alpha$ ) $\rightarrow$ LUMO+2( $\alpha$ )(0.92)   | L <sup>1</sup> ( $\pi$ ) $\rightarrow$ bpy( $\pi^*$ )                                                      |
| 580(546)                                                                                                                         | 9100(0.04)                                    | HOMO-2( $\alpha$ ) $\rightarrow$ LUMO( $\alpha$ )(0.70)   | L <sup>1</sup> ( $\pi$ )/Ru(d $\pi$ ) $\rightarrow$ bpy( $\pi^*$ )                                         |
| 494(507)                                                                                                                         | 20600(0.055)                                  | HOMO-3( $\alpha$ ) $\rightarrow$ LUMO+1( $\alpha$ )(0.85) | Ru(d $\pi$ )/L <sup>1</sup> ( $\pi$ )/bpy( $\pi$ ) $\rightarrow$ bpy( $\pi^*$ )                            |
| 430(433)                                                                                                                         | 17800(0.03)                                   | HOMO( $\alpha$ ) $\rightarrow$ LUMO+7( $\alpha$ )(0.76)   | L <sup>1</sup> ( $\pi$ ) $\rightarrow$ Ru(d $\pi$ )/L <sup>1</sup> ( $\pi^*$ )/bpy( $\pi^*$ )              |
| (395)                                                                                                                            | 17800(0.052)                                  | HOMO-2( $\beta$ ) $\rightarrow$ LUMO+5( $\beta$ )(0.58)   | Ru(d $\pi$ )/L <sup>1</sup> ( $\pi$ )/bpy( $\pi$ ) $\rightarrow$ bpy( $\pi^*$ )                            |
| 345(369)                                                                                                                         | 37000(0.070)                                  | HOMO-3( $\alpha$ ) $\rightarrow$ LUMO+4( $\alpha$ )(0.83) | Ru(d $\pi$ )/L <sup>1</sup> ( $\pi$ )/bpy( $\pi$ ) $\rightarrow$ bpy( $\pi^*$ )                            |
| (349)                                                                                                                            | 37000(0.065)                                  | HOMO-3( $\alpha$ ) $\rightarrow$ LUMO+5( $\alpha$ )(0.38) | Ru(d $\pi$ )/L <sup>1</sup> ( $\pi$ )/bpy( $\pi$ ) $\rightarrow$ bpy( $\pi^*$ )Ru(d $\pi$ )                |
|                                                                                                                                  |                                               | HOMO-3( $\beta$ ) $\rightarrow$ LUMO+3( $\beta$ )(0.38)   | L <sup>1</sup> ( $\pi$ )/Ru(d $\pi$ ) $\rightarrow$ bpy( $\pi^*$ )                                         |
| (311)                                                                                                                            | 37000(0.087)                                  | HOMO-4( $\alpha$ ) $\rightarrow$ LUMO+4( $\alpha$ )(0.58) | L <sup>1</sup> ( $\pi$ )/Ru(d $\pi$ ) $\rightarrow$ bpy( $\pi^*$ )                                         |
| <b>1<sup>2+</sup> (S=0)</b>                                                                                                      |                                               |                                                           |                                                                                                            |
| 915(773)                                                                                                                         | 19300(0.33)                                   | HOMO-2 $\rightarrow$ LUMO(0.68)                           | Ru(d $\pi$ )/L <sup>1</sup> ( $\pi$ ) $\rightarrow$ L <sup>1</sup> ( $\pi^*$ )                             |
| 805(773)                                                                                                                         | 19300(0.33)                                   | HOMO-2 $\rightarrow$ LUMO(0.68)                           | Ru(d $\pi$ )/L <sup>1</sup> ( $\pi$ ) $\rightarrow$ L <sup>1</sup> ( $\pi^*$ )                             |
| 623(588)                                                                                                                         | 6550(0.38)                                    | HOMO-3 $\rightarrow$ LUMO(0.60)                           | L <sup>1</sup> ( $\pi$ ) $\rightarrow$ L <sup>1</sup> ( $\pi^*$ )                                          |
| 578(556)                                                                                                                         | 9130(0.03)                                    | HOMO-5 $\rightarrow$ LUMO(0.57)                           | bpy( $\pi$ ) $\rightarrow$ L <sup>1</sup> ( $\pi^*$ )                                                      |
| 487(482)                                                                                                                         | 15000(0.048)                                  | HOMO-1 $\rightarrow$ LUMO+1(0.66)                         | Ru(d $\pi$ )/L <sup>1</sup> ( $\pi$ ) $\rightarrow$ bpy( $\pi^*$ )                                         |
| ----(452)                                                                                                                        | 15000(0.052)                                  | HOMO-2 $\rightarrow$ LUMO+2(0.66)                         | Ru(d $\pi$ )/L <sup>1</sup> ( $\pi$ ) $\rightarrow$ bpy( $\pi^*$ )                                         |
| 421(415)                                                                                                                         | 19400(0.05)                                   | HOMO-1 $\rightarrow$ LUMO+3(0.67)                         | Ru(d $\pi$ )/L <sup>1</sup> ( $\pi$ ) $\rightarrow$ L <sup>1</sup> ( $\pi^*$ )                             |
| 400(373)                                                                                                                         | 20490(0.05)                                   | HOMO-2 $\rightarrow$ LUMO+3(0.50)                         | Ru(d $\pi$ )/L <sup>1</sup> ( $\pi$ ) $\rightarrow$ L <sup>1</sup> ( $\pi^*$ )                             |
|                                                                                                                                  |                                               | HOMO-3 $\rightarrow$ LUMO+3(0.25)                         | L <sup>1</sup> ( $\pi$ ) $\rightarrow$ L <sup>1</sup> ( $\pi^*$ )                                          |

|                |              |                     |                                               |
|----------------|--------------|---------------------|-----------------------------------------------|
| 345(361)       | 32200(0.087) | HOMO-1→LUMO+4(0.53) | L <sup>1</sup> (π)→L <sup>1</sup> (π*)        |
| ---(315)       | 32200(0.076) | HOMO-3→LUMO+3(0.47) | L <sup>1</sup> (π)→L <sup>1</sup> (π*)        |
|                |              | HOMO-2→LUMO+6(0.15) | Ru(dπ)/L <sup>1</sup> (π)→bpy(π*)             |
| <b>1 (S=0)</b> |              |                     |                                               |
| 858(1323)      | 7600(0.062)  | HOMO→LUMO+1(0.65)   | L <sup>1</sup> (π)/bpy(π)→bpy(π*)             |
| ----- (662)    | ---(0.043)   | HOMO→LUMO+3(0.52)   | L <sup>1</sup> (π)/bpy(π)→bpy(π*)             |
| 588(565)       | 10160(0.11)  | HOMO-3→LUMO+1(0.44) | Ru(dπ)/L <sup>1</sup> (π)→bpy(π*)             |
| 484(490)       | 24700(0.03)  | HOMO→LUMO+7(0.66)   | L <sup>1</sup> (π)/bpy(π)→Ru(dπ)/bpy(π*)      |
| ----(482)      | 24700(0.04)  | HOMO-1→LUMO+4(0.67) | Ru(dπ)→bpy(π*)                                |
| 334(365)       | 37500(0.102) | HOMO-3→LUMO+5(0.33) | Ru(dπ)/L <sup>1</sup> (π)→bpy(π*)             |
|                |              | HOMO-1→LUMO+7(0.26) | Ru(dπ)→L <sup>1</sup> (π*)                    |
| ----(344)      | 37500(0.03)  | HOMO→LUMO+12(0.62)  | L <sup>1</sup> (π)/bpy(π)→L <sup>1</sup> (π*) |
| 320(309)       | 38700(0.124) | HOMO-1→LUMO+9(0.55) | Ru(dπ)→L <sup>1</sup> (π*)                    |

<sup>a</sup> Experimental absorption maxima ( $\lambda_{\max} > 300$  nm) from OTTLE spectroelectrochemistry in CH<sub>3</sub>CN/0.1M Bu<sub>4</sub>NClO<sub>4</sub>. <sup>b</sup> Molar extinction coefficients in dm<sup>3</sup>cm<sup>-1</sup> mol<sup>-1</sup>. <sup>c</sup> Calculated oscillator strengths.

**Table S17.** Experimental and TD-DFT (M06L/CPCM/CH<sub>3</sub>CN) calculated electronic transitions for **2<sup>n</sup>**

| $\lambda_{\max}/\text{nm}$<br>(expt.) <sup>a</sup><br>( $\varepsilon/\text{dm}^3\text{cm}^{-1}$<br>$\text{mol}^{-1}$ ) <sup>b</sup> | $\lambda/\text{nm}$ (DFT)<br>(f) <sup>c</sup> | transitions               | character                                                                              |
|-------------------------------------------------------------------------------------------------------------------------------------|-----------------------------------------------|---------------------------|----------------------------------------------------------------------------------------|
| <b>2<sup>+</sup> (S=1/2)</b>                                                                                                        |                                               |                           |                                                                                        |
| 2107(2003) <sup>d</sup>                                                                                                             | 2800(0.00088)                                 | HOMO→LUMO(0.99)           | Os(dπ)/bpy(π)→L <sup>1</sup> (π <sup>*</sup> )/bpy(π <sup>*</sup> )                    |
| 1625(1503)                                                                                                                          | 1700(0.0012)                                  | HOMO(β)→LUMO(β)(0.99)     | Os(dσ)→L <sup>1</sup> (π <sup>*</sup> )/bpy(π <sup>*</sup> )                           |
| 935(920)                                                                                                                            | 16900(0.082)                                  | HOMO(α)→LUMO(α)(0.90)     | L <sup>1</sup> (π)/Os(dπ)→bpy(π <sup>*</sup> )                                         |
| (890)                                                                                                                               | 16900(0.13)                                   | HOMO-2(β)→LUMO(β)(0.41)   | Os(dπ)/bpy(π)/L <sup>1</sup> (π)→L <sup>1</sup> (π <sup>*</sup> )/bpy(π <sup>*</sup> ) |
| 707(679)                                                                                                                            | 4300(0.013)                                   | HOMO-1(α)→LUMO(α)(0.72)   | Os(dπ)/bpy(π)→bpy(π <sup>*</sup> )                                                     |
| 639(623)                                                                                                                            | 4300(0.024)                                   | HOMO(α)→LUMO+2(α)(0.92)   | L <sup>1</sup> (π)/Os(dπ)→bpy(π <sup>*</sup> )                                         |
| 490(505)                                                                                                                            | 9600(0.043)                                   | HOMO-3(α)→LUMO+1(α)(0.74) | Os(dπ)/bpy(π)/L <sup>1</sup> (π)→bpy(π <sup>*</sup> )                                  |
| (433)                                                                                                                               | 9600(0.052)                                   | HOMO-1(β)→LUMO+3(β)(0.58) | L <sup>1</sup> (π)/Os(dπ)→bpy(π <sup>*</sup> )                                         |
| (411)                                                                                                                               | 9600(0.064)                                   | HOMO-2(α)→LUMO+3(α)(0.48) | L <sup>1</sup> (π)/Os(dπ)→bpy(π <sup>*</sup> )                                         |
|                                                                                                                                     |                                               | HOMO-4(α)→LUMO+1(α)(0.44) | L <sup>1</sup> (π)→bpy(π <sup>*</sup> )                                                |
| 385(385)                                                                                                                            | 14100(0.078)                                  | HOMO-3(α)→LUMO+2(α)(0.45) | Os(dπ)/L <sup>1</sup> (π)/bpy(π)→bpy(π <sup>*</sup> )                                  |
|                                                                                                                                     |                                               | HOMO-7(β)→LUMO(β)(0.45)   | bpy(π)→L <sup>1</sup> (π <sup>*</sup> )/bpy(π <sup>*</sup> )                           |
| (369)                                                                                                                               | 14100 (0.105)                                 | HOMO-3(α)→LUMO+4(α)(0.75) | Os(dπ)/L <sup>1</sup> (π)/bpy(π)→bpy(π <sup>*</sup> )                                  |
| 343(342)                                                                                                                            | 16900(0.083)                                  | HOMO-3(β)→LUMO+4(β)(0.38) | L <sup>1</sup> (π)→bpy(π <sup>*</sup> )                                                |
|                                                                                                                                     |                                               | HOMO-1(α)→LUMO+6(α)(0.25) | Os(dπ)/bpy(π)→L <sup>1</sup> (π <sup>*</sup> )                                         |
| (311)                                                                                                                               | 16900(0.078)                                  | HOMO-4(α)→LUMO+2(α)(0.52) | L <sup>1</sup> (π)→bpy(π <sup>*</sup> )                                                |
| <b>2<sup>2+</sup> (S=0)</b>                                                                                                         |                                               |                           |                                                                                        |
| 2230(2533)                                                                                                                          | 2100(0.000)                                   | HOMO→LUMO(0.71)           | Os(dσ)→L <sup>1</sup> (π <sup>*</sup> )                                                |
| 720(795)                                                                                                                            | 20200(0.34)                                   | HOMO-2→LUMO(0.68)         | Os(dπ)/L <sup>1</sup> (π)→L <sup>1</sup> (π <sup>*</sup> )                             |
| ----(602)                                                                                                                           | 20200(0.025)                                  | HOMO→LUMO+1(0.69)         | Os(dπ)/bpy(π)→bpy(π <sup>*</sup> )                                                     |



|                |              |                     |                                                                  |
|----------------|--------------|---------------------|------------------------------------------------------------------|
| 492(540)       | 7300(0.064)  | HOMO-5→LUMO(0.55)   | bpy( $\pi$ )→L <sup>1</sup> ( $\pi^*$ )/Os(d $\pi$ )             |
| ---(506)       | 7300(0.074)  | HOMO-1→LUMO+1(0.66) | Os(d $\pi$ )/L <sup>1</sup> ( $\pi$ )→bpy( $\pi^*$ )             |
| ---(485)       | 7300(0.050)  | HOMO→LUMO+3(0.62)   | Os(d $\pi$ )/bpy( $\pi$ )→L <sup>1</sup> ( $\pi^*$ )             |
| ---(463)       | 7300(0.054)  | HOMO-2→LUMO+2(0.67) | Os(d $\pi$ )/L <sup>1</sup> ( $\pi$ )→bpy( $\pi^*$ )             |
| 400(422)       | 13840(0.089) | HOMO-1→LUMO+3(0.67) | Os(d $\pi$ )/L <sup>1</sup> ( $\pi$ )→L <sup>1</sup> ( $\pi^*$ ) |
| 385(391)       | 14100(0.050) | HOMO→LUMO+6(0.64)   | Os(d $\pi$ )/bpy( $\pi$ )→bpy( $\pi^*$ )                         |
| 364(366)       | 13400(0.080) | HOMO-3→LUMO+2(0.58) | L <sup>1</sup> ( $\pi$ )→bpy( $\pi^*$ )                          |
| 341(348)       | 13500(0.085) | HOMO-2→LUMO+5(0.58) | Os(d $\pi$ )/L <sup>1</sup> ( $\pi$ )→bpy( $\pi^*$ )             |
| ---(313)       | 13500(0.105) | HOMO-3→LUMO+3(0.64) | L <sup>1</sup> ( $\pi$ )→L <sup>1</sup> ( $\pi^*$ )              |
| <b>2 (S=0)</b> |              |                     |                                                                  |
| 886(914)       | 4900(0.059)  | HOMO→LUMO(0.61)     | L <sup>1</sup> ( $\pi$ )/bpy( $\pi$ )→bpy( $\pi^*$ )             |
| 755(672)       | 5300(0.03)   | HOMO-1→LUMO(0.63)   | Os(d $\pi$ )/bpy( $\pi$ )→bpy( $\pi^*$ )                         |
| 587(579)       | 10880(0.07)  | HOMO-2→LUMO(0.57)   | L <sup>1</sup> ( $\pi$ )/Os(d $\pi$ )→bpy( $\pi^*$ )             |
| 490(500)       | 16800(0.075) | HOMO→LUMO+6(0.50)   | L <sup>1</sup> ( $\pi$ )/bpy( $\pi$ )→L <sup>1</sup> ( $\pi^*$ ) |
|                |              | HOMO-3→LUMO+1(0.38) | Os(d $\pi$ )/L <sup>1</sup> ( $\pi$ )→bpy( $\pi^*$ )             |
| ---(493)       | 16800(0.07)  | HOMO→LUMO+6(0.48)   | L <sup>1</sup> ( $\pi$ )/bpy( $\pi$ )→L <sup>1</sup> ( $\pi^*$ ) |
| 432(434)       | 15200(0.07)  | HOMO→LUMO+7(0.69)   | L <sup>1</sup> ( $\pi$ )/bpy( $\pi$ )→L <sup>1</sup> ( $\pi^*$ ) |
| ---(396)       | 15200(0.15)  | HOMO-2→LUMO+3(0.45) | L <sup>1</sup> ( $\pi$ )/Os(d $\pi$ )→bpy( $\pi^*$ )             |
| 346(349)       | 18560(0.03)  | HOMO-3→LUMO+4(0.60) | Os(d $\pi$ )/L <sup>1</sup> ( $\pi$ )→bpy( $\pi^*$ )             |
| ---(320)       | 18560(0.07)  | HOMO-3→LUMO+5(0.39) | Os(d $\pi$ )/L <sup>1</sup> ( $\pi$ )→bpy( $\pi^*$ )             |
|                |              | HOMO→LUMO+9(0.35)   | L <sup>1</sup> ( $\pi$ )/bpy( $\pi$ )→bpy( $\pi^*$ )             |

<sup>a</sup> Experimental absorption maxima ( $\lambda_{\text{max}} > 300$  nm) from OTTLE spectroelectrochemistry in CH<sub>3</sub>CN/0.1M Bu<sub>4</sub>NClO<sub>4</sub>. <sup>b</sup> Molar extinction coefficients in dm<sup>3</sup>cm<sup>-1</sup>mol<sup>-1</sup>. <sup>c</sup> Calculated oscillator strengths. <sup>d</sup> Calculations using ORCA indicated such a transition at 2003 nm.

**Table S18.** Experimental and TD-DFT (M06L/CPCM/CH<sub>3</sub>CN) calculated electronic Transitionsfor **3<sup>n</sup>**

| $\lambda_{\text{max}}/\text{nm}$<br>(expt.) <sup>a</sup><br>( $\epsilon/\text{dm}^3\text{cm}^{-1}$<br>$\text{mol}^{-1}$ ) <sup>b</sup> | $\lambda/\text{nm}$ (DFT)<br>(f) <sup>c</sup> | transitions               | character                                                                          |
|----------------------------------------------------------------------------------------------------------------------------------------|-----------------------------------------------|---------------------------|------------------------------------------------------------------------------------|
| <b>3<sup>2+</sup> (S=0)</b>                                                                                                            |                                               |                           |                                                                                    |
| 560(608)                                                                                                                               | 17500(0.263)                                  | HOMO-2→LUMO(0.66)         | Ru(dπ)/bpy(π)→H <sub>2</sub> L <sup>2</sup> (π*)                                   |
| 428(462)                                                                                                                               | 4700(0.17)                                    | HOMO-3→LUMO(0.66)         | H <sub>2</sub> L <sup>2</sup> (π)/Ru(dπ) →H <sub>2</sub> L <sup>2</sup> (π*)       |
| (429)                                                                                                                                  | 4890(0.08)                                    | HOMO→LUMO+3(0.52)         | Ru(dπ) →bpy(π*)                                                                    |
| (421)                                                                                                                                  | 4890(0.05)                                    | HOMO-5→LUMO(0.52)         | H <sub>2</sub> L <sup>2</sup> (π)→H <sub>2</sub> L <sup>2</sup> (π*)               |
| 387(394)                                                                                                                               | 4200(0.03)                                    | HOMO-3→LUMO+1(0.51)       | H <sub>2</sub> L <sup>2</sup> (π)/Ru(dπ)→bpy(π*)                                   |
| (376)                                                                                                                                  | 4200(0.033)                                   | HOMO-2→LUMO+3(0.51)       | Ru(dπ)/bpy(π)→bpy(π*)                                                              |
| 352(376)                                                                                                                               | 5900(0.05)                                    | HOMO-1→LUMO+4(0.62)       | Ru(dπ)/H <sub>2</sub> L <sup>2</sup> (π)→bpy(π*)                                   |
| ----(352)                                                                                                                              | 5900(0.065)                                   | HOMO-2→LUMO+5(0.51)       | Ru(dπ)/bpy(π)→bpy(π*)                                                              |
| <b>3<sup>3+</sup> (S=1/2)</b>                                                                                                          |                                               |                           |                                                                                    |
| 415(441)                                                                                                                               | 6400(0.063)                                   | HOMO-14(β)→LUMO(β)(0.85)  | bpy(π)/H <sub>2</sub> L <sup>2</sup> (π)→Ru(dπ)/H <sub>2</sub> L <sup>2</sup> (π*) |
| ---(436)                                                                                                                               | 6400(0.080)                                   | HOMO-14(β)→LUMO(β)(0.57)  | H <sub>2</sub> L <sup>2</sup> (π)/bpy(π)→Ru(dπ)/H <sub>2</sub> L <sup>2</sup> (π*) |
| 394(377)                                                                                                                               | 6600(0.040)                                   | HOMO-19(β)→LUMO(β)(0.54)  | H <sub>2</sub> L <sup>2</sup> (π)/bpy(π)→Ru(dπ)/H <sub>2</sub> L <sup>2</sup> (π*) |
| ---(340)                                                                                                                               | 6600(0.087)                                   | HOMO(β)→LUMO+4(β)(0.40)   | Ru(dπ)/H <sub>2</sub> L <sup>2</sup> (π)→H <sub>2</sub> L <sup>2</sup> (π*)        |
|                                                                                                                                        |                                               | HOMO-3(β)→LUMO+4(β)(0.25) | Ru(dπ)/H <sub>2</sub> L <sup>2</sup> (π)→H <sub>2</sub> L <sup>2</sup> (π*)        |
| <b>3<sup>+</sup> (S=1/2)</b>                                                                                                           |                                               |                           |                                                                                    |
| 638(651)                                                                                                                               | 2800(0.024)                                   | HOMO-2(β)→LUMO(β)(0.85)   | Ru(dπ)→bpy(π*)                                                                     |
| ---(643)                                                                                                                               | 2800(0.101)                                   | HOMO-1(β)→LUMO(β)(0.76)   | H <sub>2</sub> L <sup>2</sup> (π)/Ru(dπ)→bpy(π*)                                   |
| 550(595)                                                                                                                               | 12700(0.025)                                  | HOMO-1(β)→LUMO+2(β)(0.65) | H <sub>2</sub> L <sup>2</sup> (π)/Ru(dπ)→H <sub>2</sub> L <sup>2</sup> (π*)        |
| ---(544)                                                                                                                               | 12700(0.067)                                  | HOMO-3(α)→LUMO(α)(0.62)   | Ru(dπ)/bpy(π)→bpy(π*)                                                              |
| ---(528)                                                                                                                               | 12700(0.064)                                  | HOMO-3(α)→LUMO+1(α)(0.67) | Ru(dπ)/bpy(π)→bpy(π*)                                                              |
| 450(477)                                                                                                                               | 4300(0.035)                                   | HOMO(β)→LUMO+5(β)(0.65)   | Ru(dπ)/H <sub>2</sub> L <sup>2</sup> (π)→bpy(π*)                                   |

|                                           |              |                                                            |                                                            |
|-------------------------------------------|--------------|------------------------------------------------------------|------------------------------------------------------------|
| 405(401)                                  | 5700(0.038)  | HOMO-1( $\beta$ ) $\rightarrow$ LUMO+5( $\beta$ )(0.65)    | $H_2L^2(\pi)/Ru(d\pi)\rightarrow bpy(\pi^*)$               |
| ---(389)                                  | 5700(0.046)  | HOMO-1( $\beta$ ) $\rightarrow$ LUMO+4( $\beta$ )(0.62)    | $H_2L^2(\pi)/Ru(d\pi)\rightarrow bpy(\pi^*)$               |
| 356(357)                                  | 7000(0.13)   | HOMO( $\alpha$ ) $\rightarrow$ LUMO+13( $\alpha$ )(0.68)   | $H_2L^2(\pi)/bpy(\pi)\rightarrow H_2L^2(\pi^*)/Ru(d\pi)$   |
| <b>3 (<math>S=0</math>)</b>               |              |                                                            |                                                            |
| 1000(965)                                 | 1000(0.022)  | HOMO $\rightarrow$ LUMO+3(0.70)                            | $H_2L^2(\pi)/bpy(\pi)\rightarrow bpy(\pi^*)$               |
| 625(629)                                  | 5100(0.032)  | HOMO $\rightarrow$ LUMO+7(0.70)                            | $H_2L^2(\pi)/bpy(\pi)\rightarrow H_2L^2(\pi^*)$            |
| 592(558)                                  | 5100(0.06)   | HOMO-2 $\rightarrow$ LUMO(0.42)                            | $Ru(d\pi)/H_2L^2(\pi)\rightarrow bpy(\pi^*)$               |
|                                           |              | HOMO-2 $\rightarrow$ LUMO+1(0.36)                          | $Ru(d\pi)/H_2L^2(\pi)\rightarrow bpy(\pi^*)$               |
| 546(542)                                  | 5680(0.094)  | HOMO-2 $\rightarrow$ LUMO+1(0.39)                          | $Ru(d\pi)/H_2L^2(\pi)\rightarrow bpy(\pi^*)$               |
|                                           |              | HOMO-3 $\rightarrow$ LUMO(0.38)                            | $Ru(d\pi)\rightarrow bpy(\pi^*)$                           |
| 486(501)                                  | 7300(0.036)  | HOMO-3 $\rightarrow$ LUMO+1(0.40)                          | $Ru(d\pi)/bpy(\pi)\rightarrow bpy(\pi^*)/H_2L^2(\pi^*)$    |
|                                           |              | HOMO-2 $\rightarrow$ LUMO(0.20)                            | $Ru(d\pi)/H_2L^2(\pi)\rightarrow bpy(\pi^*)$               |
| ----(442)                                 | 7300(0.050)  | HOMO $\rightarrow$ LUMO+10(0.64)                           | $H_2L^2(\pi)/bpy(\pi)\rightarrow bpy(\pi^*)$               |
| 396(414)                                  | 6200(0.045)  | HOMO-5 $\rightarrow$ LUMO(0.42)                            | $H_2L^2(\pi)\rightarrow bpy(\pi^*)$                        |
|                                           |              | HOMO-2 $\rightarrow$ LUMO+3(0.41)                          | $Ru(d\pi)/H_2L^2(\pi)\rightarrow bpy(\pi^*)$               |
| ----(388)                                 | 6200(0.145)  | HOMO-3 $\rightarrow$ LUMO+4(0.56)                          | $Ru(d\pi)/bpy(\pi)\rightarrow bpy(\pi^*)/H_2L^2(\pi^*)$    |
| 360(358)                                  | 7400(0.21)   | HOMO $\rightarrow$ LUMO+13(0.57)                           | $H_2L^2(\pi)/bpy(\pi)\rightarrow Ru(d\pi)$                 |
| <b>3<sup>-</sup> (<math>S=1/2</math>)</b> |              |                                                            |                                                            |
| 1286(1327)                                | 1800(0.098)  | HOMO( $\beta$ ) $\rightarrow$ LUMO+1( $\beta$ )(0.60)      | $H_2L^2(\pi)\rightarrow bpy(\pi^*)$                        |
| 619(628)                                  | 6200(0.12)   | HOMO-1( $\beta$ ) $\rightarrow$ LUMO+2( $\beta$ )(0.65)    | $Ru(d\pi)\rightarrow H_2L^2(\pi^*)$                        |
| 587(564)                                  | 6200(0.038)  | HOMO-2( $\beta$ ) $\rightarrow$ LUMO+1( $\beta$ )(0.90)    | $Ru(d\pi)/bpy(\pi)\rightarrow bpy(\pi^*)$                  |
| 558(516)                                  | 5590(0.025)  | HOMO-3( $\beta$ ) $\rightarrow$ LUMO( $\beta$ )(0.58)      | $Ru(d\pi)/H_2L^2(\pi)\rightarrow bpy(\pi^*)$               |
| 508(477)                                  | 4920(0.03)   | HOMO( $\alpha$ ) $\rightarrow$ LUMO+10( $\alpha$ )(0.51)   | $bpy(\pi)\rightarrow bpy(\pi^*)$                           |
| 432(428)                                  | 6730(0.05)   | HOMO( $\beta$ ) $\rightarrow$ LUMO+9( $\beta$ )(0.38)      | $H_2L^2(\pi)\rightarrow bpy(\pi^*)/Ru(d\pi)$               |
|                                           |              | HOMO-1( $\alpha$ ) $\rightarrow$ LUMO+9( $\alpha$ )(0.51)  | $bpy(\pi)/H_2L^2(\pi)\rightarrow bpy(\pi^*)/Ru(d\pi)$      |
| 368(382)                                  | 11200(0.035) | HOMO-4( $\beta$ ) $\rightarrow$ LUMO( $\beta$ )(0.42)      | $H_2L^2(\pi)\rightarrow bpy(\pi^*)$                        |
|                                           |              | HOMO( $\beta$ ) $\rightarrow$ LUMO+13( $\beta$ )(0.35)     | $H_2L^2(\pi)\rightarrow bpy(\pi^*)/Ru(d\pi)$               |
| 368(375)                                  | 11200(0.083) | HOMO-3( $\beta$ ) $\rightarrow$ LUMO+5( $\beta$ )(0.46)    | $Ru(d\pi)/H_2L^2(\pi)\rightarrow H_2L^2(\pi^*)/bpy(\pi^*)$ |
|                                           |              | HOMO-1( $\alpha$ ) $\rightarrow$ LUMO+12( $\alpha$ )(0.44) | $bpy(\pi)/H_2L^2(\pi)\rightarrow H_2L^2(\pi^*)/Ru(d\pi)$   |

<sup>a</sup> Experimental absorption maxima ( $\lambda_{\text{max}} > 300$  nm) from OTTLE spectroelectrochemistry in CH<sub>3</sub>CN/0.1M Bu<sub>4</sub>NClO<sub>4</sub>. <sup>b</sup> Molar extinction coefficients in dm<sup>3</sup>cm<sup>-1</sup> mol<sup>-1</sup>. <sup>c</sup> Calculated oscillator strengths.

**Table S19.** Experimental and TD-DFT (M06L/CPCM/CH<sub>3</sub>CN) calculated electronic transitions for **4<sup>n</sup>**

| $\lambda_{\max}/\text{nm}$<br>(expt.) <sup>a</sup><br>( $\varepsilon/\text{dm}^3\text{cm}^{-1}$<br>$\text{mol}^{-1}$ ) <sup>b</sup> | $\lambda/\text{nm}$ (DFT)<br>(f) <sup>c</sup> | transitions                               | character                                                                                                     |
|-------------------------------------------------------------------------------------------------------------------------------------|-----------------------------------------------|-------------------------------------------|---------------------------------------------------------------------------------------------------------------|
| <b>4<sup>2+</sup> (S=0)</b>                                                                                                         |                                               |                                           |                                                                                                               |
| 1031(899)                                                                                                                           | 1110(0.003)                                   | HOMO→LUMO(0.70)                           | H <sub>2</sub> L <sup>2</sup> ( $\pi$ )/Os(d $\pi$ )→H <sub>2</sub> L <sup>2</sup> ( $\pi^*$ )/bpy( $\pi^*$ ) |
| 718(721)                                                                                                                            | 800(0.012)                                    | HOMO-1→LUMO(0.70)                         | Os(d $\pi$ )/H <sub>2</sub> L <sup>2</sup> ( $\pi$ )→H <sub>2</sub> L <sup>2</sup> ( $\pi^*$ )/bpy( $\pi^*$ ) |
| 550(623)                                                                                                                            | 24100(0.26)                                   | HOMO-2→LUMO(0.65)                         | Os(d $\pi$ )/bpy( $\pi$ )→H <sub>2</sub> L <sup>2</sup> ( $\pi^*$ )/bpy( $\pi^*$ )                            |
| (516)                                                                                                                               | 24100(0.063)                                  | HOMO-1→LUMO+1(0.61)                       | Os(d $\pi$ )/H <sub>2</sub> L <sup>2</sup> ( $\pi$ )→bpy( $\pi^*$ )                                           |
| (492)                                                                                                                               | 24100(0.052)                                  | HOMO-2→LUMO+2(0.57)                       | Os(d $\pi$ )/bpy( $\pi$ )→bpy( $\pi^*$ )                                                                      |
| 416(436)                                                                                                                            | 11400(0.24)                                   | HOMO-3→LUMO(0.38)                         | H <sub>2</sub> L <sup>2</sup> ( $\pi$ )→H <sub>2</sub> L <sup>2</sup> ( $\pi^*$ )/bpy( $\pi^*$ )              |
|                                                                                                                                     |                                               | HOMO-2→LUMO(0.16)                         | Os(d $\pi$ )/bpy( $\pi$ )→H <sub>2</sub> L <sup>2</sup> ( $\pi^*$ )/bpy( $\pi^*$ )                            |
| (420)                                                                                                                               | 11400(0.15)                                   | HOMO-3→LUMO(0.50)                         | H <sub>2</sub> L <sup>2</sup> ( $\pi$ )/Os(d $\pi$ )→H <sub>2</sub> L <sup>2</sup> ( $\pi^*$ )/bpy( $\pi^*$ ) |
| 340(365)                                                                                                                            | 11100(0.07)                                   | HOMO-2→LUMO+5(0.63)                       | Os(d $\pi$ )/bpy( $\pi$ )→bpy( $\pi^*$ )                                                                      |
| (348)                                                                                                                               | 11100(0.108)                                  | HOMO-7→LUMO(0.44)                         | bpy( $\pi$ )→H <sub>2</sub> L <sup>2</sup> ( $\pi^*$ )/bpy( $\pi^*$ )                                         |
|                                                                                                                                     |                                               | HOMO-2→LUMO+3(0.34)                       | Os(d $\pi$ )/bpy( $\pi$ )→bpy( $\pi^*$ )                                                                      |
| <b>4<sup>3+</sup> (S=1/2)</b>                                                                                                       |                                               |                                           |                                                                                                               |
| 1890(1525) <sup>d</sup>                                                                                                             | 900(0.0024)                                   | HOMO-1( $\beta$ )→LUMO( $\beta$ )(0.88)   | Os(d $\pi$ )/bpy( $\pi$ )→Os(d $\pi$ )/H <sub>2</sub> L <sup>2</sup> ( $\pi^*$ )                              |
| 544(636)                                                                                                                            | 10400(0.121)                                  | HOMO-6( $\beta$ )→LUMO( $\beta$ )(0.87)   | H <sub>2</sub> L <sup>2</sup> ( $\pi$ )→Os(d $\pi$ )/H <sub>2</sub> L <sup>2</sup> ( $\pi^*$ )                |
| 495(433)                                                                                                                            | 7120(0.051)                                   | HOMO-1( $\beta$ )→LUMO+3( $\beta$ )(0.77) | Os(d $\pi$ )/bpy( $\pi$ )→bpy( $\pi^*$ )                                                                      |
| 400(426)                                                                                                                            | 11400(0.243)                                  | HOMO-10( $\beta$ )→LUMO( $\beta$ )(0.46)  | H <sub>2</sub> L <sup>2</sup> ( $\pi$ )/bpy( $\pi$ )→Os(d $\pi$ )/H <sub>2</sub> L <sup>2</sup> ( $\pi^*$ )   |
|                                                                                                                                     |                                               | HOMO-3( $\beta$ )→LUMO+1( $\beta$ )(0.42) | Os(d $\pi$ )/H <sub>2</sub> L <sup>2</sup> ( $\pi$ )→H <sub>2</sub> L <sup>2</sup> ( $\pi^*$ )/Os(d $\pi$ )   |
| ---(422)                                                                                                                            | 11400(0.094)                                  | HOMO-10( $\beta$ )→LUMO( $\beta$ )(0.83)  | H <sub>2</sub> L <sup>2</sup> ( $\pi$ )/bpy( $\pi$ )→Os(d $\pi$ )/H <sub>2</sub> L <sup>2</sup> ( $\pi^*$ )   |
| ---(388)                                                                                                                            | 11400(0.030)                                  | HOMO-13( $\beta$ )→LUMO( $\beta$ )(0.84)  | H <sub>2</sub> L <sup>2</sup> ( $\pi$ )→Os(d $\pi$ )/H <sub>2</sub> L <sup>2</sup> ( $\pi^*$ )                |
| 333(380)                                                                                                                            | 12400(0.030)                                  | HOMO-8( $\alpha$ )→LUMO( $\alpha$ )(0.54) | H <sub>2</sub> L <sup>2</sup> ( $\pi$ )→H <sub>2</sub> L <sup>2</sup> ( $\pi^*$ )                             |
| 333(337)                                                                                                                            | 12400(0.133)                                  | HOMO( $\beta$ )→LUMO+4( $\beta$ )(0.42)   | H <sub>2</sub> L <sup>2</sup> ( $\pi$ )/Os(d $\pi$ )→H <sub>2</sub> L <sup>2</sup> ( $\pi^*$ )                |

|                              |              | HOMO( $\alpha$ ) $\rightarrow$ LUMO+3( $\alpha$ )(0.41)   | H <sub>2</sub> L <sup>2</sup> ( $\pi$ )/Os(d $\pi$ ) $\rightarrow$ H <sub>2</sub> L <sup>2</sup> ( $\pi^*$ )                |
|------------------------------|--------------|-----------------------------------------------------------|-----------------------------------------------------------------------------------------------------------------------------|
| <b>4<sup>+</sup> (S=1/2)</b> |              |                                                           |                                                                                                                             |
| 1031(1592)                   | 1400(0.02)   | HOMO( $\alpha$ ) $\rightarrow$ LUMO+1( $\alpha$ )(0.98)   | H <sub>2</sub> L <sup>2</sup> ( $\pi$ )/bpy( $\pi$ ) $\rightarrow$ bpy( $\pi^*$ )                                           |
| ----(873)                    | 1400(0.015)  | HOMO( $\alpha$ ) $\rightarrow$ LUMO+2( $\alpha$ )(0.98)   | H <sub>2</sub> L <sup>2</sup> ( $\pi$ )/bpy( $\pi$ ) $\rightarrow$ bpy( $\pi^*$ )                                           |
| 720(699)                     | 3900(0.022)  | HOMO-1( $\beta$ ) $\rightarrow$ LUMO( $\beta$ )(0.86)     | H <sub>2</sub> L <sup>2</sup> ( $\pi$ )/bpy( $\pi$ ) $\rightarrow$ bpy( $\pi^*$ )                                           |
| 640(679)                     | 4600(0.141)  | HOMO-2( $\beta$ ) $\rightarrow$ LUMO+2( $\beta$ )(0.87)   | H <sub>2</sub> L <sup>2</sup> ( $\pi$ )/bpy( $\pi$ ) $\rightarrow$ bpy( $\pi^*$ )                                           |
| 550(571)                     | 18000(0.022) | HOMO( $\alpha$ ) $\rightarrow$ LUMO+7( $\alpha$ )(0.98)   | H <sub>2</sub> L <sup>2</sup> ( $\pi$ )/bpy( $\pi$ ) $\rightarrow$ H <sub>2</sub> L <sup>2</sup> ( $\pi^*$ )                |
| ---(539)                     | 18000(0.05)  | HOMO-3( $\alpha$ ) $\rightarrow$ LUMO( $\alpha$ )(0.58)   | Os(d $\pi$ )/bpy( $\pi$ ) $\rightarrow$ bpy( $\pi^*$ )/H <sub>2</sub> L <sup>2</sup> ( $\pi^*$ )                            |
| ---(522)                     | 18000(0.066) | HOMO-3( $\alpha$ ) $\rightarrow$ LUMO+1( $\alpha$ )(0.61) | Os(d $\pi$ )/bpy( $\pi$ ) $\rightarrow$ bpy( $\pi^*$ )                                                                      |
| 448(484)                     | 13200(0.053) | HOMO-1( $\alpha$ ) $\rightarrow$ LUMO+4( $\alpha$ )(0.70) | Os(d $\pi$ ) $\rightarrow$ bpy( $\pi^*$ )                                                                                   |
| 423(451)                     | 11800(0.051) | HOMO-1( $\alpha$ ) $\rightarrow$ LUMO+5( $\alpha$ )(0.65) | Os(d $\pi$ ) $\rightarrow$ bpy( $\pi^*$ )                                                                                   |
| 343(381)                     | 11200(0.112) | HOMO-1( $\beta$ ) $\rightarrow$ LUMO+6( $\beta$ )(0.37)   | H <sub>2</sub> L <sup>2</sup> ( $\pi$ )/Os(d $\pi$ ) $\rightarrow$ bpy( $\pi^*$ )                                           |
|                              |              | HOMO-1( $\alpha$ ) $\rightarrow$ LUMO+7( $\alpha$ )(0.36) | Os(d $\pi$ ) $\rightarrow$ H <sub>2</sub> L <sup>2</sup> ( $\pi^*$ )                                                        |
| ---(357)                     | 11200(0.111) | HOMO( $\alpha$ ) $\rightarrow$ LUMO+11( $\alpha$ )(0.86)  | H <sub>2</sub> L <sup>2</sup> ( $\pi$ )/bpy( $\pi$ ) $\rightarrow$ bpy( $\pi^*$ )/Os(d $\pi$ )                              |
| <b>4 (S=0)</b>               |              |                                                           |                                                                                                                             |
| 1152(1247)                   | 3900(0.16)   | HOMO $\rightarrow$ LUMO+1(0.71)                           | bpy( $\pi$ )/H <sub>2</sub> L <sup>2</sup> ( $\pi$ ) $\rightarrow$ bpy( $\pi^*$ )                                           |
| 771(779)                     | 4800(0.02)   | HOMO $\rightarrow$ LUMO+4(0.65)                           | bpy( $\pi$ )/H <sub>2</sub> L <sup>2</sup> ( $\pi$ ) $\rightarrow$ bpy( $\pi^*$ )                                           |
| 590(538)                     | 8600(0.15)   | HOMO-2 $\rightarrow$ LUMO(0.54)                           | H <sub>2</sub> L <sup>2</sup> ( $\pi$ )/Os((d $\pi$ ) $\rightarrow$ bpy( $\pi^*$ ))                                         |
| 474(496)                     | 15700(0.063) | HOMO-3 $\rightarrow$ LUMO+1(0.50)                         | Os(d $\pi$ )/bpy( $\pi$ ) $\rightarrow$ bpy( $\pi^*$ )                                                                      |
| ----(459)                    | 15700(0.067) | HOMO-1 $\rightarrow$ LUMO+5(0.64)                         | Os(d $\pi$ ) $\rightarrow$ bpy( $\pi^*$ )                                                                                   |
| 364(380)                     | 13200(0.091) | HOMO-5 $\rightarrow$ LUMO+1(0.53)                         | H <sub>2</sub> L <sup>2</sup> ( $\pi$ ) $\rightarrow$ bpy( $\pi^*$ )                                                        |
| <b>4<sup>-</sup> (S=1/2)</b> |              |                                                           |                                                                                                                             |
| 1123(1088)                   | 6600(0.014)  | HOMO-1( $\alpha$ ) $\rightarrow$ LUMO+1( $\alpha$ )(0.69) | bpy( $\pi$ )/H <sub>2</sub> L <sup>2</sup> ( $\pi$ ) $\rightarrow$ H <sub>2</sub> L <sup>2</sup> ( $\pi^*$ )                |
| ----(994)                    | 6600(0.093)  | HOMO-1( $\alpha$ ) $\rightarrow$ LUMO+5( $\alpha$ )(0.54) | bpy( $\pi$ )/H <sub>2</sub> L <sup>2</sup> ( $\pi$ ) $\rightarrow$ bpy( $\pi^*$ )/H <sub>2</sub> L <sup>2</sup> ( $\pi^*$ ) |
| 716(662)                     | 4810(0.083)  | HOMO-1( $\alpha$ ) $\rightarrow$ LUMO+5( $\alpha$ )(0.51) | bpy( $\pi$ )/H <sub>2</sub> L <sup>2</sup> ( $\pi$ ) $\rightarrow$ bpy( $\pi^*$ )/H <sub>2</sub> L <sup>2</sup> ( $\pi^*$ ) |
| 542(561)                     | 10700(0.056) | HOMO-2( $\beta$ ) $\rightarrow$ LUMO+2( $\beta$ )(0.73)   | Os(d $\pi$ )/bpy( $\pi$ ) $\rightarrow$ bpy( $\pi^*$ )/H <sub>2</sub> L <sup>2</sup> ( $\pi^*$ )                            |
| 434(455)                     | 13100(0.049) | HOMO( $\alpha$ ) $\rightarrow$ LUMO+9( $\alpha$ )(0.64)   | bpy( $\pi$ ) $\rightarrow$ H <sub>2</sub> L <sup>2</sup> ( $\pi^*$ )                                                        |
| 362(376)                     | 19500(0.092) | HOMO( $\alpha$ ) $\rightarrow$ LUMO+12( $\alpha$ )(0.51)  | H <sub>2</sub> L <sup>2</sup> ( $\pi$ )/bpy( $\pi$ ) $\rightarrow$ bpy( $\pi^*$ )                                           |

<sup>a</sup> Experimental absorption maxima ( $\lambda_{\text{max}} > 300$  nm) from OTTLE spectroelectrochemistry in CH<sub>3</sub>CN/0.1M Bu<sub>4</sub>NClO<sub>4</sub>. <sup>b</sup> Molar extinction coefficients in dm<sup>3</sup>cm<sup>-1</sup> mol<sup>-1</sup>. <sup>c</sup> Calculated oscillator strengths. <sup>d</sup> Calculations using ORCA indicated such a transition at 1525 nm.

**Table S20** DFT calculated MO composition for  $1^+$  in  $S = 1/2$  state

| MO           | energy (eV) | % composition |     |                |
|--------------|-------------|---------------|-----|----------------|
|              |             | Ru            | bpy | L <sup>1</sup> |
| $\alpha$ -MO |             |               |     |                |
| LUMO+5       | -4.177      | 6             | 93  | 1              |
| LUMO+4       | -4.205      | 3             | 96  | 1              |
| LUMO+3       | -4.314      | 4             | 96  | 1              |
| LUMO+2       | -4.512      | 2             | 97  | 1              |
| LUMO+1       | -5.153      | 11            | 87  | 1              |
| LUMO         | -5.253      | 8             | 91  | 2              |
| SOMO         | -6.186      | 13            | 9   | 78             |
| HOMO-1       | -7.014      | 73            | 15  | 12             |
| HOMO-2       | -7.212      | 37            | 9   | 54             |
| HOMO-3       | -7.285      | 62            | 19  | 19             |
| HOMO-4       | -7.644      | 17            | 4   | 80             |
| HOMO-5       | -7.837      | 43            | 10  | 47             |
| $\beta$ -MO  |             |               |     |                |
| LUMO+5       | -4.198      | 3             | 96  | 1              |
| LUMO+4       | -4.311      | 4             | 96  | 1              |
| LUMO+3       | -4.510      | 2             | 97  | 1              |
| LUMO+2       | -5.140      | 11            | 87  | 2              |
| LUMO+1       | -5.209      | 11            | 80  | 9              |
| LUMO         | -5.595      | 6             | 20  | 74             |
| HOMO         | -6.947      | 71            | 15  | 14             |
| HOMO-1       | -7.061      | 37            | 9   | 54             |
| HOMO-2       | -7.208      | 60            | 20  | 21             |
| HOMO-3       | -7.610      | 19            | 4   | 77             |
| HOMO-4       | -7.647      | 45            | 10  | 45             |
| HOMO-5       | -8.498      | 5             | 3   | 92             |

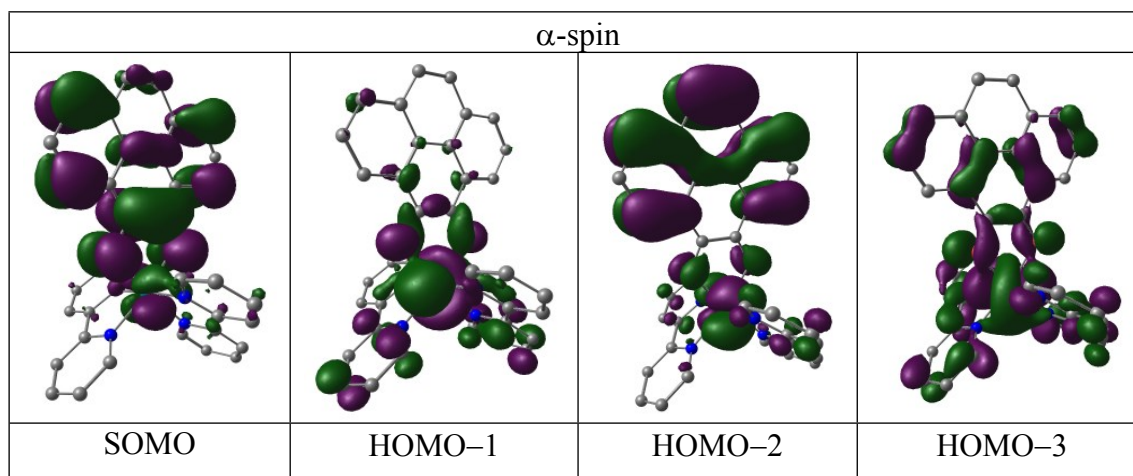



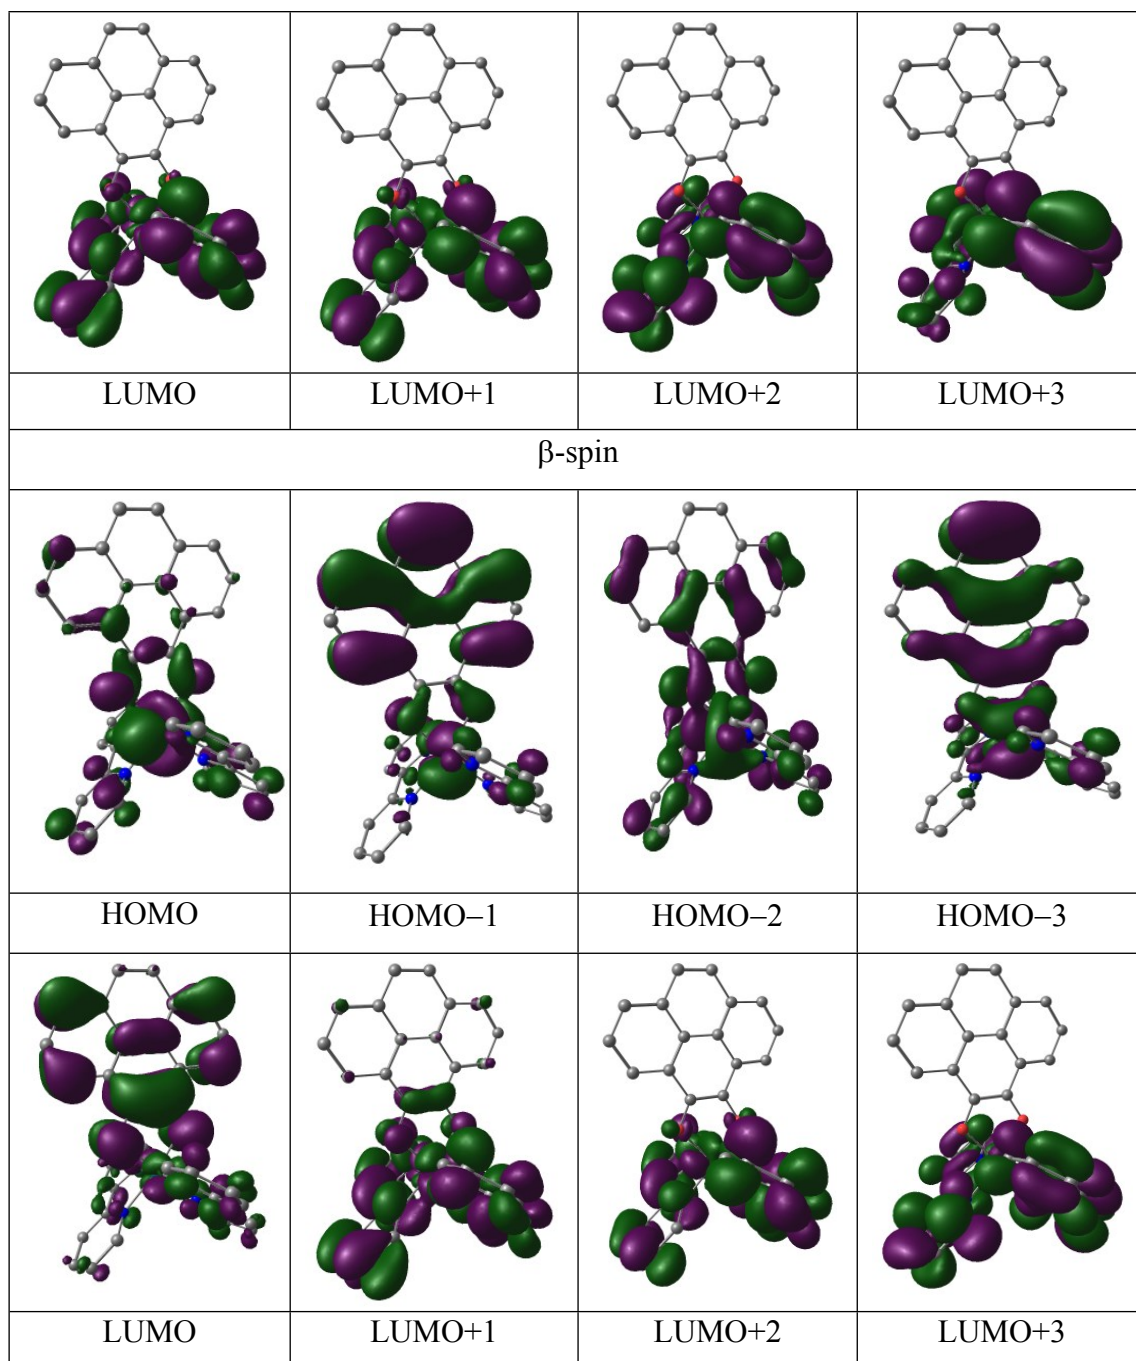

**Table S21** DFT Calculated MO Composition for  $1^{2+}$  in  $S = 0$  State

| MO     | energy (eV) | % composition |     |                |
|--------|-------------|---------------|-----|----------------|
|        |             | Ru            | bpy | L <sup>1</sup> |
| LUMO+5 | -6.943      | 3             | 95  | 2              |
| LUMO+4 | -7.061      | 3             | 95  | 2              |
| LUMO+3 | -7.220      | 1             | 2   | 97             |
| LUMO+2 | -7.859      | 8             | 91  | 1              |
| LUMO+1 | -7.920      | 6             | 93  | 1              |
| LUMO   | -9.488      | 16            | 6   | 78             |
| HOMO   | -10.132     | 78            | 13  | 9              |
| HOMO-1 | -10.365     | 64            | 13  | 24             |
| HOMO-2 | -10.371     | 58            | 11  | 31             |
| HOMO-3 | -10.990     | 7             | 2   | 91             |
| HOMO-4 | -10.994     | 35            | 9   | 56             |
| HOMO-5 | -11.608     | 1             | 98  | 1              |

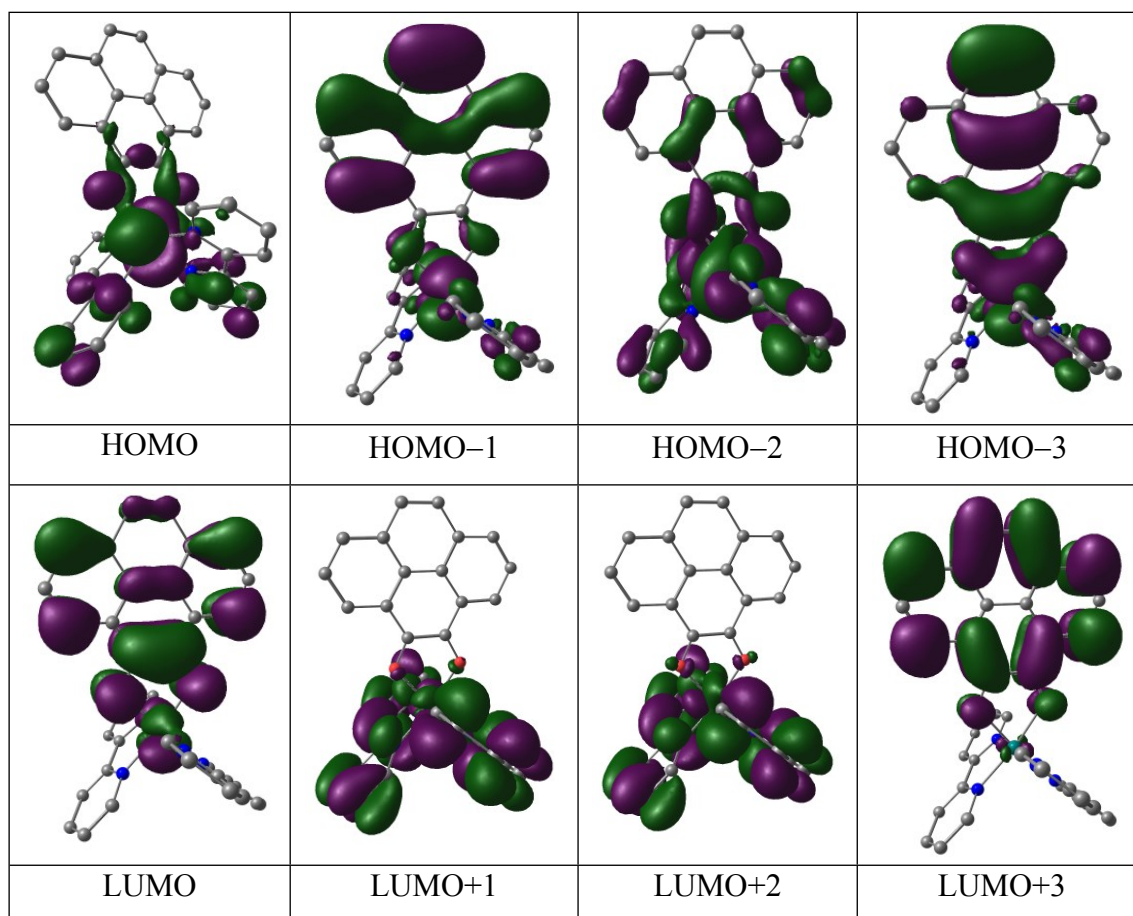

**Table S22** DFT calculated MO composition for **1** in  $S = 0$  state

| MO     | energy (eV) | % composition |     |                |
|--------|-------------|---------------|-----|----------------|
|        |             | Ru            | bpy | L <sup>1</sup> |
| LUMO+5 | -1.425      | 4             | 95  | 1              |
| LUMO+4 | -1.462      | 5             | 94  | 1              |
| LUMO+3 | -1.531      | 5             | 94  | 1              |
| LUMO+2 | -1.753      | 2             | 97  | 1              |
| LUMO+1 | -2.381      | 11            | 83  | 5              |
| LUMO   | -2.450      | 11            | 77  | 12             |
| HOMO   | -2.721      | 4             | 28  | 68             |
| HOMO-1 | -4.050      | 71            | 15  | 14             |
| HOMO-2 | -4.252      | 41            | 10  | 50             |
| HOMO-3 | -4.297      | 59            | 18  | 23             |
| HOMO-4 | -4.788      | 43            | 9   | 48             |
| HOMO-5 | -4.794      | 19            | 4   | 77             |

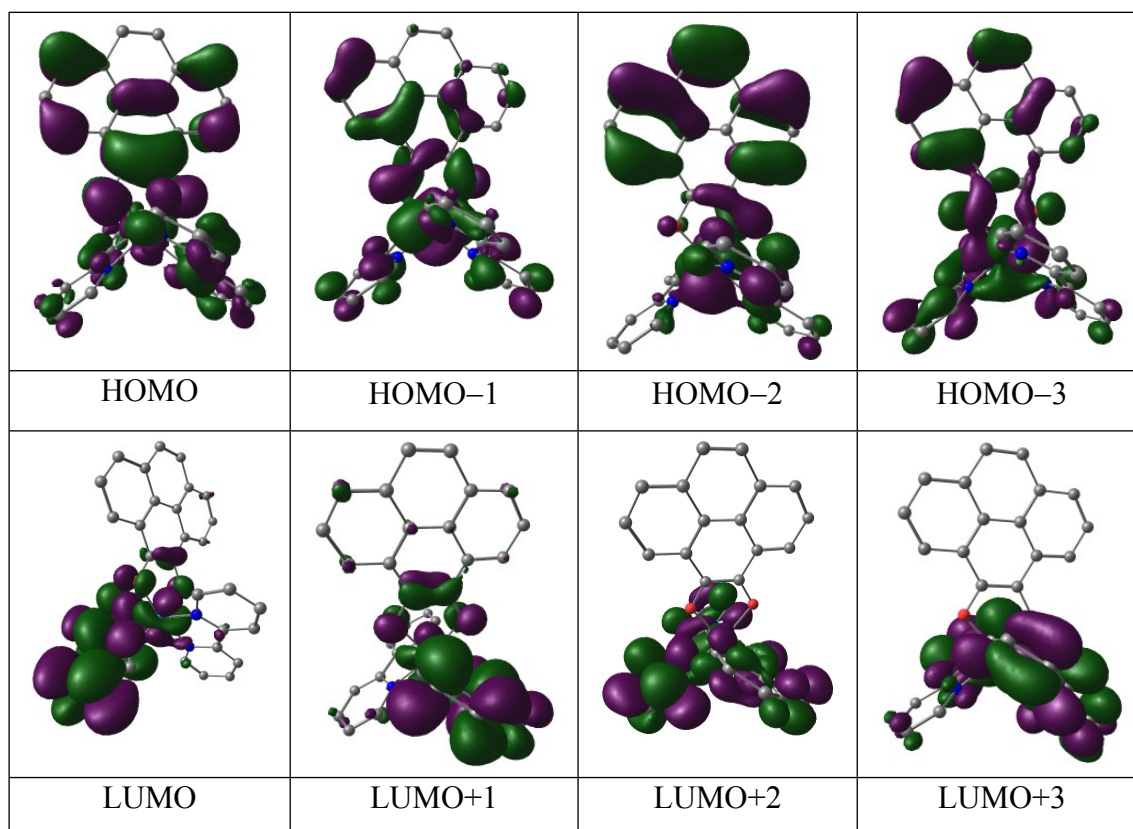

**Table S23** DFT calculated MO composition for  $1^-$  in  $S = 1/2$  state

| MO           | energy (eV) | % composition |     |                |
|--------------|-------------|---------------|-----|----------------|
|              |             | Ru            | bpy | L <sup>1</sup> |
| $\alpha$ -MO |             |               |     |                |
| LUMO+5       | 1.647       | 7             | 91  | 1              |
| LUMO+4       | 1.601       | 4             | 94  | 2              |
| LUMO+3       | 1.513       | 5             | 93  | 2              |
| LUMO+2       | 1.406       | 0             | 3   | 96             |
| LUMO+1       | 1.328       | 2             | 96  | 2              |
| LUMO         | 0.558       | 13            | 84  | 3              |
| SOMO         | 0.541       | 14            | 78  | 8              |
| HOMO-1       | -0.027      | 8             | 23  | 68             |
| HOMO-2       | -0.861      | 75            | 14  | 11             |
| HOMO-3       | -1.121      | 62            | 23  | 15             |
| HOMO-4       | -1.362      | 59            | 16  | 25             |
| HOMO-5       | -2.189      | 12            | 4   | 84             |
| $\beta$ -MO  |             |               |     |                |
| LUMO+5       | 1.673       | 5             | 94  | 1              |
| LUMO+4       | 1.561       | 4             | 94  | 2              |
| LUMO+3       | 1.414       | 0             | 2   | 97             |
| LUMO+2       | 1.387       | 3             | 95  | 2              |
| LUMO+1       | 0.869       | 11            | 86  | 3              |
| LUMO         | 0.771       | 12            | 83  | 4              |
| HOMO         | 0.054       | 12            | 19  | 69             |
| HOMO-1       | -0.803      | 75            | 14  | 11             |
| HOMO-2       | -1.061      | 64            | 21  | 15             |
| HOMO-3       | -1.219      | 58            | 16  | 25             |
| HOMO-4       | -2.162      | 9             | 4   | 88             |
| HOMO-5       | -2.251      | 5             | 2   | 93             |

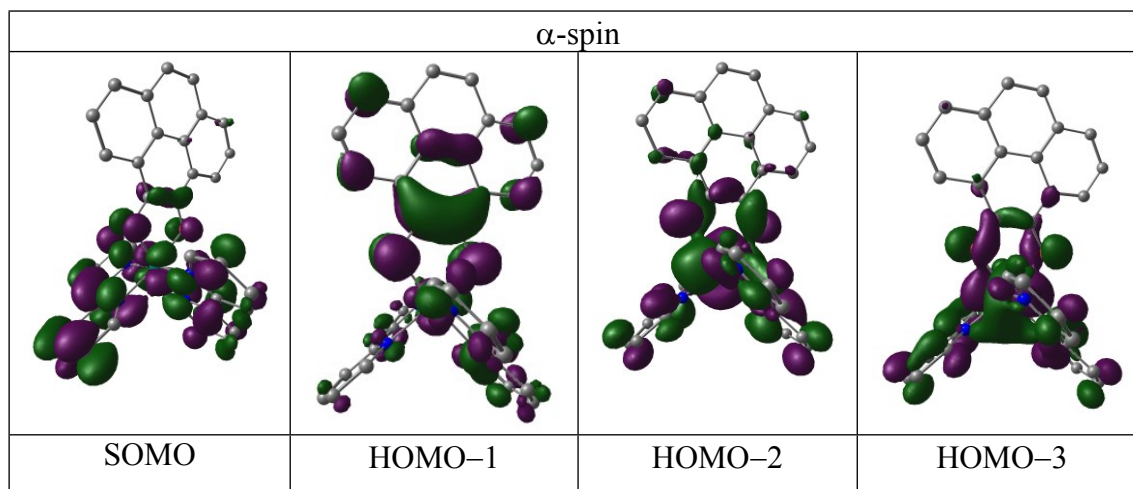

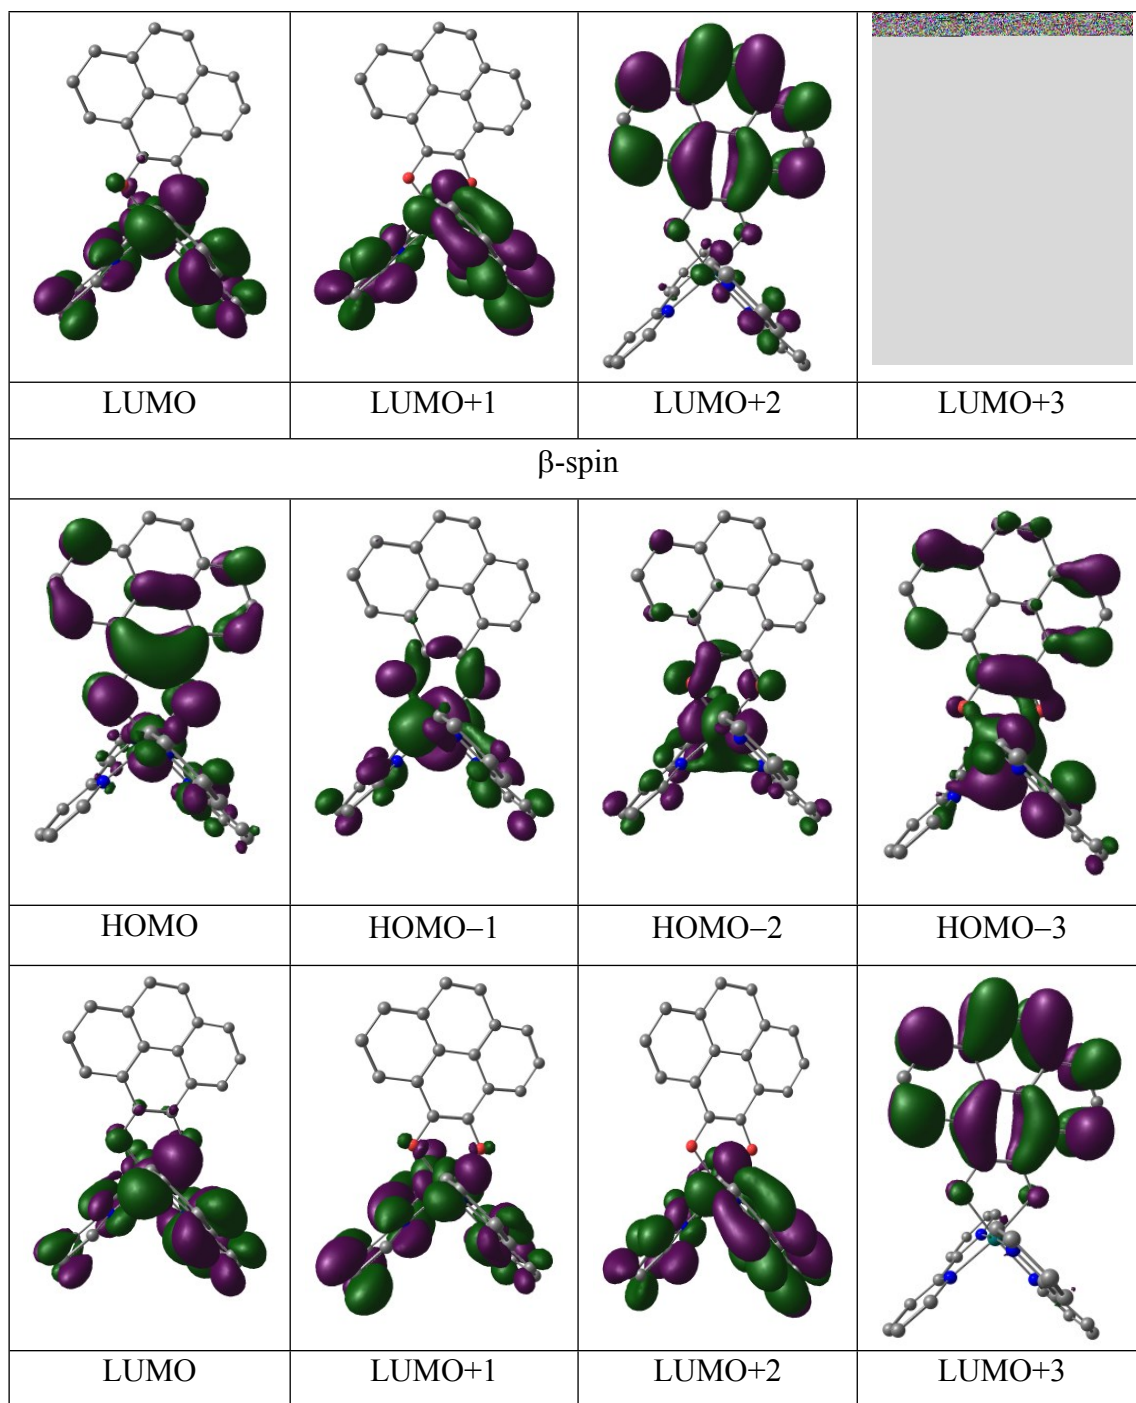



**Table S24** DFT calculated MO composition for  $\mathbf{1}^{2-}$  in  $S = 1$  state

| MO           | energy (eV) | % composition |     |                |
|--------------|-------------|---------------|-----|----------------|
|              |             | Ru            | bpy | L <sup>1</sup> |
| $\alpha$ -MO |             |               |     |                |
| LUMO+5       | 4.685       | 7             | 92  | 1              |
| LUMO+4       | 4.655       | 4             | 94  | 1              |
| LUMO+3       | 4.591       | 6             | 92  | 1              |
| LUMO+2       | 4.509       | 1             | 4   | 95             |
| LUMO+1       | 4.382       | 3             | 93  | 4              |
| LUMO         | 3.669       | 1             | 3   | 96             |
| SOMO1        | 3.503       | 16            | 79  | 5              |
| SOMO2        | 3.299       | 12            | 83  | 5              |
| HOMO-2       | 2.760       | 21            | 21  | 59             |
| HOMO-3       | 2.253       | 78            | 14  | 8              |
| HOMO-4       | 1.841       | 61            | 28  | 11             |
| HOMO-5       | 1.619       | 55            | 13  | 32             |
| $\beta$ -MO  |             |               |     |                |
| LUMO+5       | 4.706       | 7             | 92  | 1              |
| LUMO+4       | 4.521       | 1             | 25  | 74             |
| LUMO+3       | 4.481       | 3             | 72  | 24             |
| LUMO+2       | 4.070       | 13            | 84  | 2              |
| LUMO+1       | 3.859       | 8             | 90  | 2              |
| LUMO         | 3.681       | 1             | 2   | 98             |
| HOMO         | 2.875       | 30            | 15  | 55             |
| HOMO-1       | 2.373       | 76            | 15  | 8              |
| HOMO-2       | 2.108       | 64            | 26  | 9              |
| HOMO-3       | 1.757       | 49            | 12  | 39             |
| HOMO-4       | 0.222       | 1             | 39  | 60             |
| HOMO-5       | 0.212       | 2             | 23  | 76             |

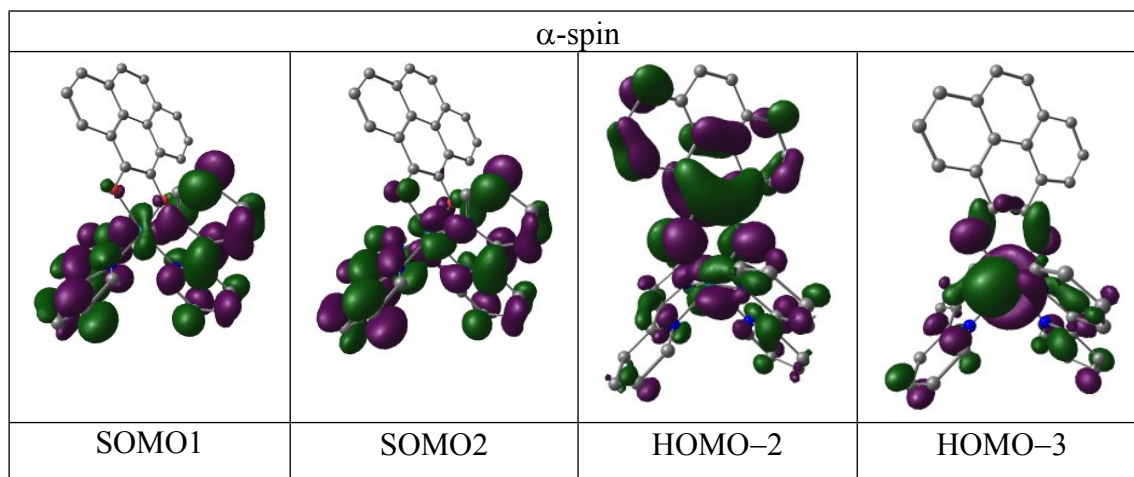

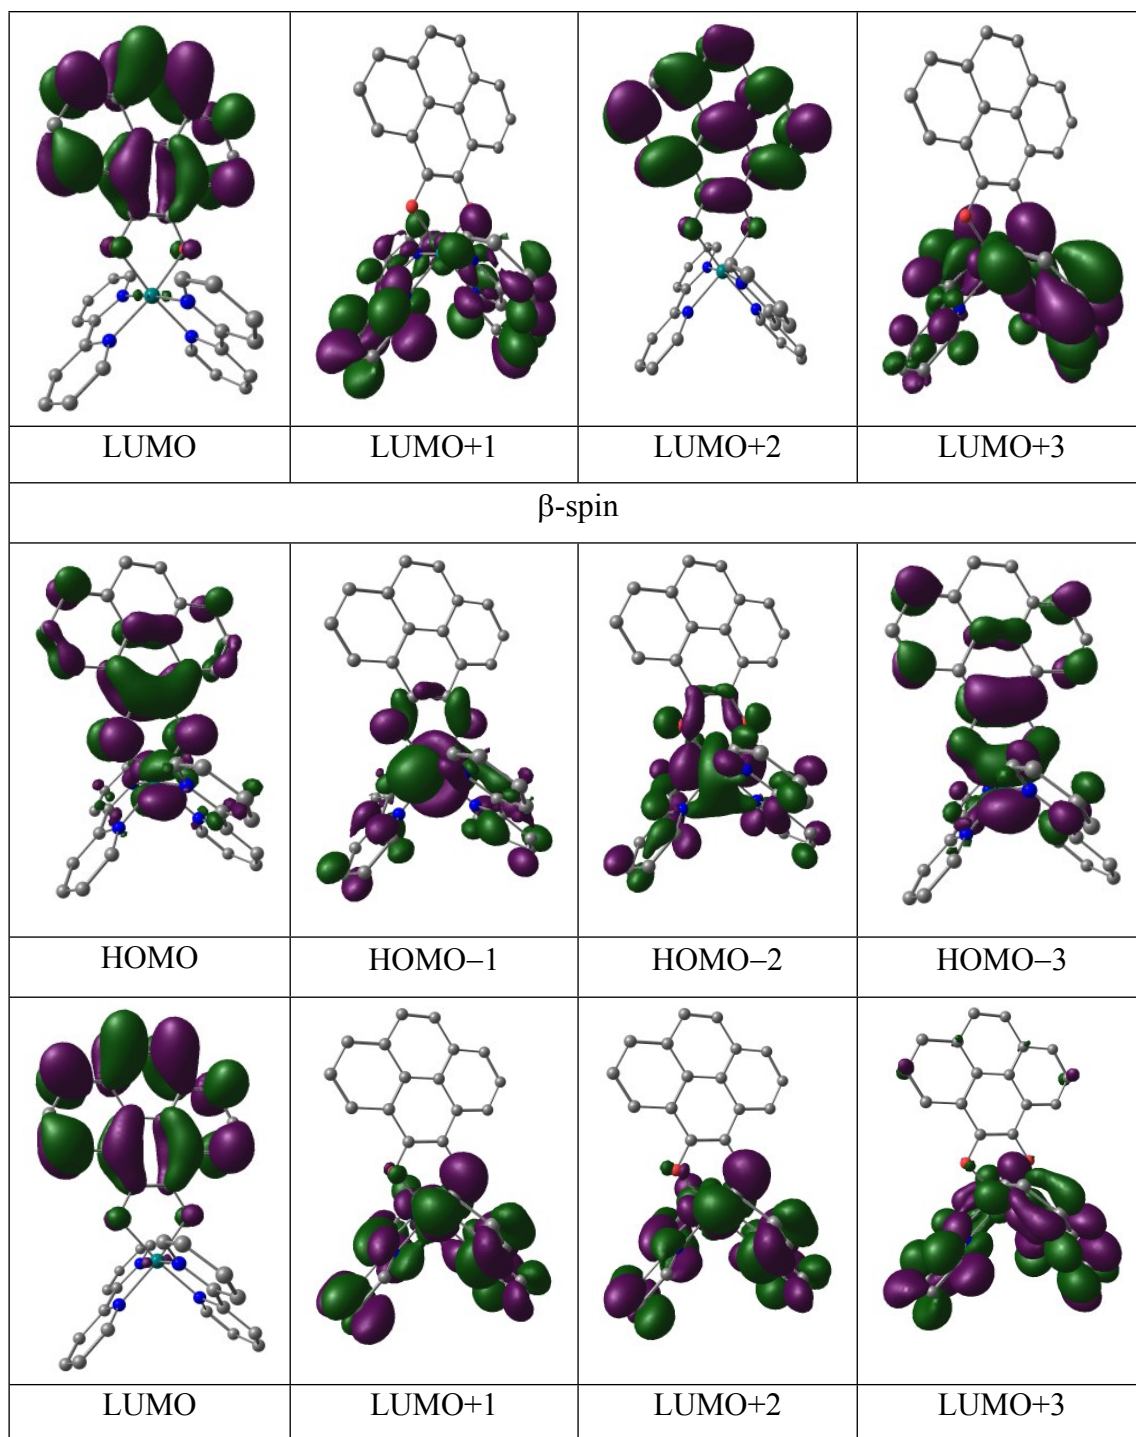

**Table S25** DFT Calculated MO Composition for  $2^+$  in  $S = 1/2$  State

| MO           | energy (eV) | % composition |     |                |
|--------------|-------------|---------------|-----|----------------|
|              |             | Os            | bpy | L <sup>1</sup> |
| $\alpha$ -MO |             |               |     |                |
| LUMO+5       | -4.137      | 9             | 90  | 1              |
| LUMO+4       | -4.269      | 4             | 95  | 1              |
| LUMO+3       | -4.328      | 4             | 96  | 1              |
| LUMO+2       | -4.531      | 2             | 97  | 1              |
| LUMO+1       | -5.057      | 14            | 84  | 2              |
| LUMO         | -5.236      | 10            | 87  | 3              |
| SOMO         | -6.332      | 18            | 13  | 69             |
| HOMO-1       | -6.890      | 69            | 20  | 12             |
| HOMO-2       | -7.198      | 41            | 15  | 44             |
| HOMO-3       | -7.228      | 53            | 22  | 25             |
| HOMO-4       | -7.670      | 10            | 3   | 87             |
| HOMO-5       | -7.973      | 31            | 10  | 59             |
| $\beta$ -MO  |             |               |     |                |
| LUMO+5       | -4.249      | 5             | 94  | 1              |
| LUMO+4       | -4.317      | 4             | 96  | 1              |
| LUMO+3       | -4.526      | 2             | 97  | 1              |
| LUMO+2       | -5.034      | 14            | 84  | 2              |
| LUMO+1       | -5.176      | 13            | 79  | 8              |
| LUMO         | -5.826      | 10            | 21  | 69             |
| HOMO         | -6.811      | 68            | 19  | 13             |
| HOMO-1       | -7.021      | 37            | 13  | 49             |
| HOMO-2       | -7.135      | 55            | 26  | 18             |
| HOMO-3       | -7.642      | 10            | 3   | 88             |
| HOMO-4       | -7.744      | 33            | 10  | 58             |
| HOMO-5       | -8.535      | 5             | 3   | 92             |

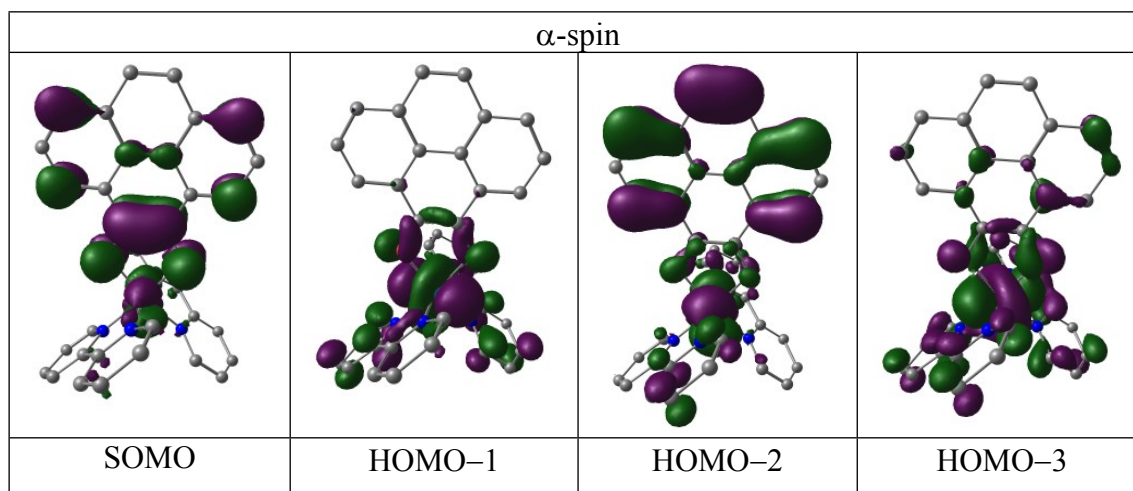



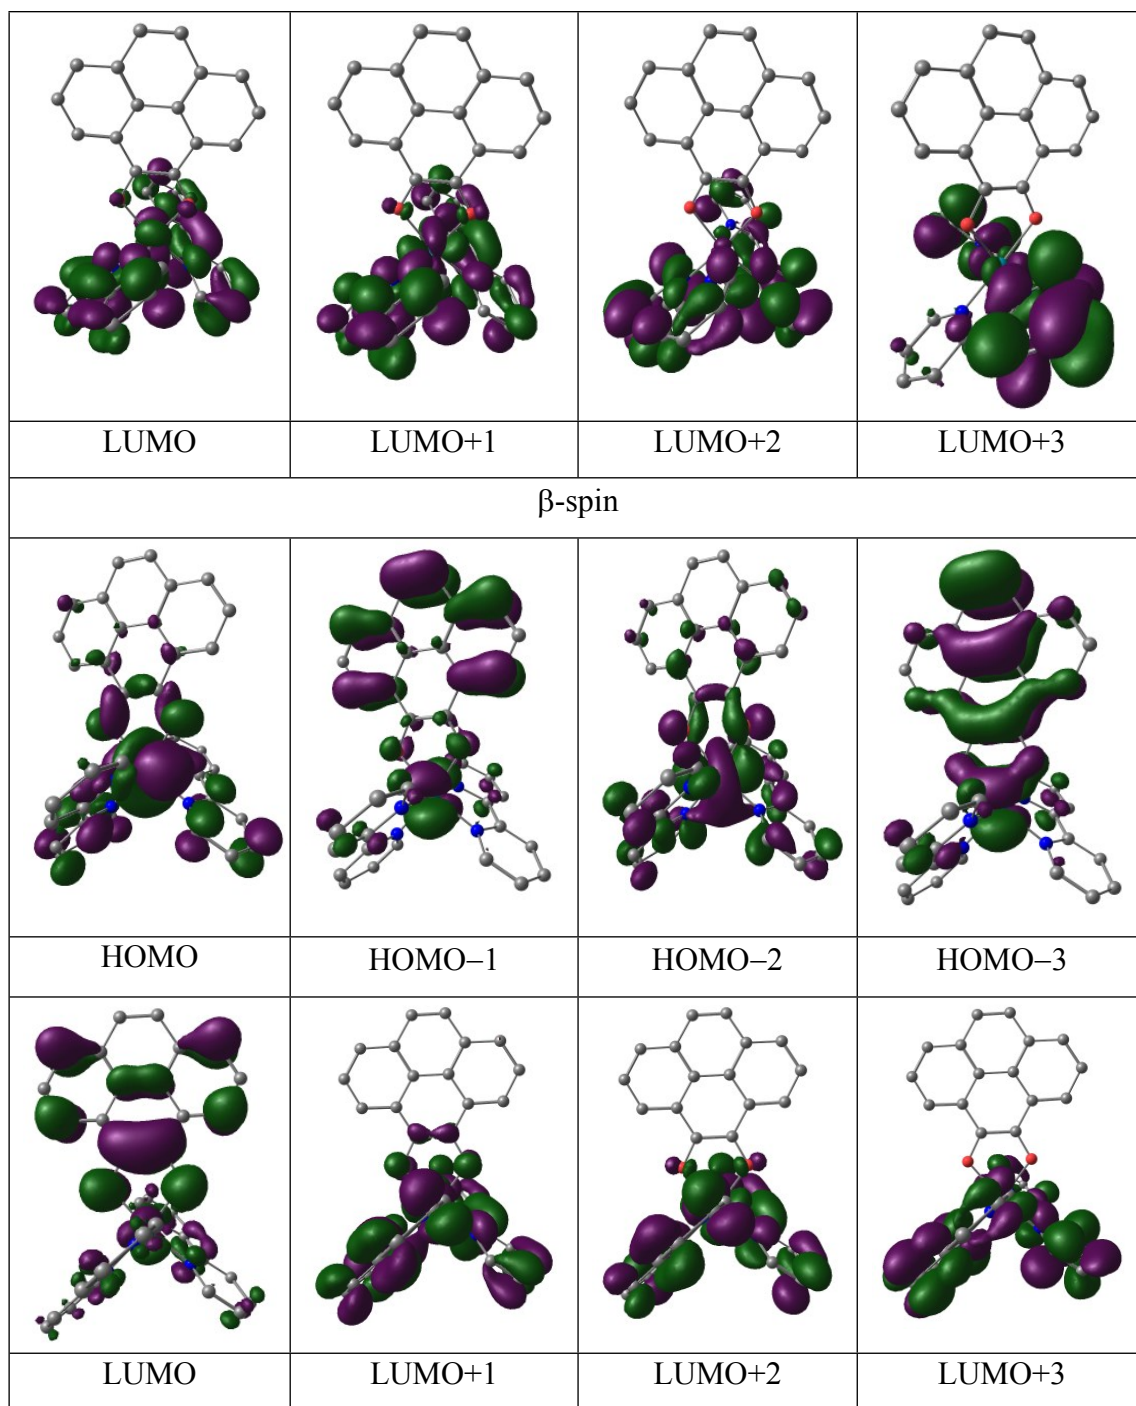

**Table S26** DFT calculated MO composition for  $2^{2+}$  in  $S = 0$  state

| MO     | energy (eV) | % composition |     |                |
|--------|-------------|---------------|-----|----------------|
|        |             | Os            | bpy | L <sup>1</sup> |
| LUMO+5 | -7.002      | 3             | 95  | 2              |
| LUMO+4 | -7.102      | 2             | 96  | 2              |
| LUMO+3 | -7.190      | 1             | 3   | 96             |
| LUMO+2 | -7.893      | 11            | 87  | 2              |
| LUMO+1 | -7.987      | 9             | 90  | 1              |
| LUMO   | -9.463      | 18            | 9   | 73             |
| HOMO   | -9.993      | 71            | 19  | 9              |
| HOMO-1 | -10.286     | 59            | 17  | 24             |
| HOMO-2 | -10.297     | 50            | 14  | 35             |
| HOMO-3 | -10.961     | 5             | 2   | 93             |
| HOMO-4 | -11.011     | 29            | 11  | 60             |
| HOMO-5 | -11.653     | 1             | 98  | 1              |

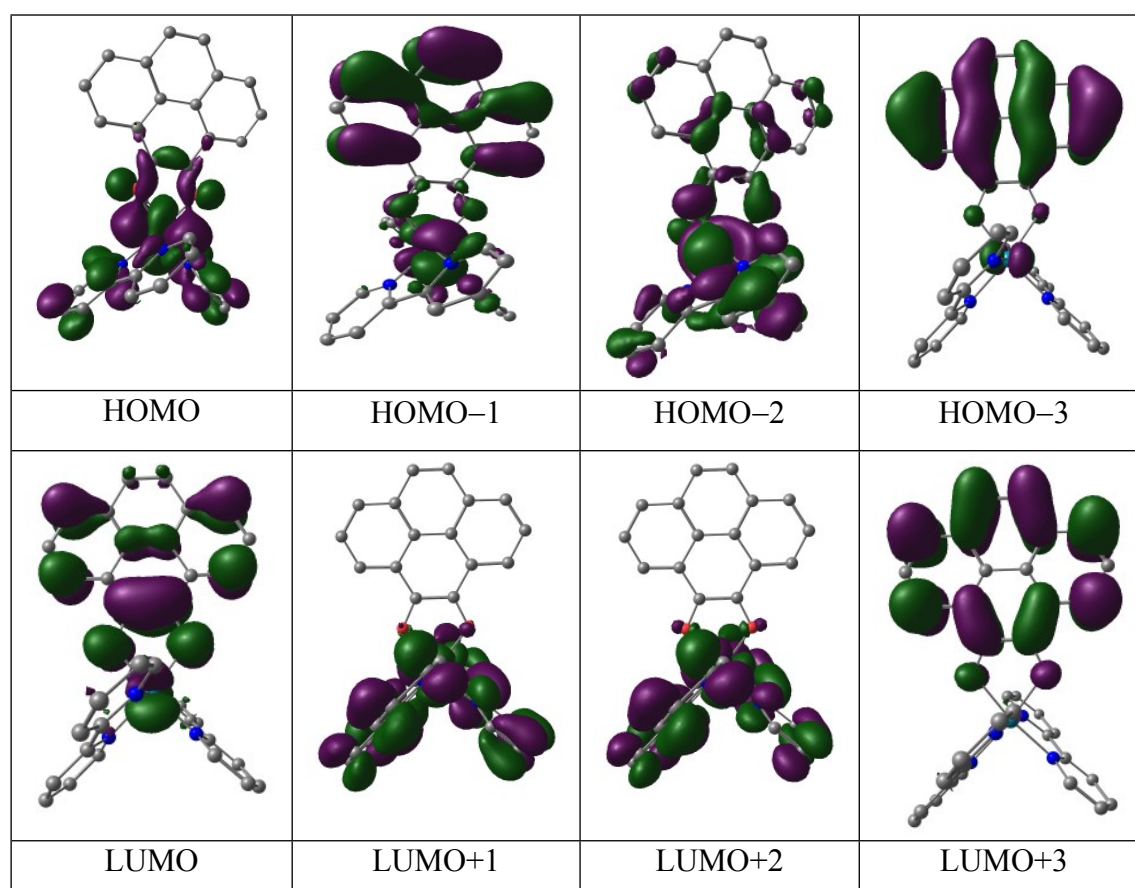

**Table S27** DFT calculated MO composition for **2** in  $S = 0$  state

| MO     | energy (eV) | % composition |     |                |
|--------|-------------|---------------|-----|----------------|
|        |             | Os            | bpy | L <sup>1</sup> |
| LUMO+5 | -1.362      | 10            | 88  | 1              |
| LUMO+4 | -1.450      | 4             | 94  | 2              |
| LUMO+3 | -1.513      | 4             | 95  | 1              |
| LUMO+2 | -1.743      | 2             | 97  | 1              |
| LUMO+1 | -2.331      | 14            | 82  | 4              |
| LUMO   | -2.412      | 15            | 73  | 12             |
| HOMO   | -2.857      | 4             | 29  | 67             |
| HOMO-1 | -3.981      | 67            | 20  | 14             |
| HOMO-2 | -4.256      | 40            | 14  | 46             |
| HOMO-3 | -4.285      | 54            | 26  | 20             |
| HOMO-4 | -4.859      | 30            | 10  | 61             |
| HOMO-5 | -4.863      | 17            | 5   | 77             |

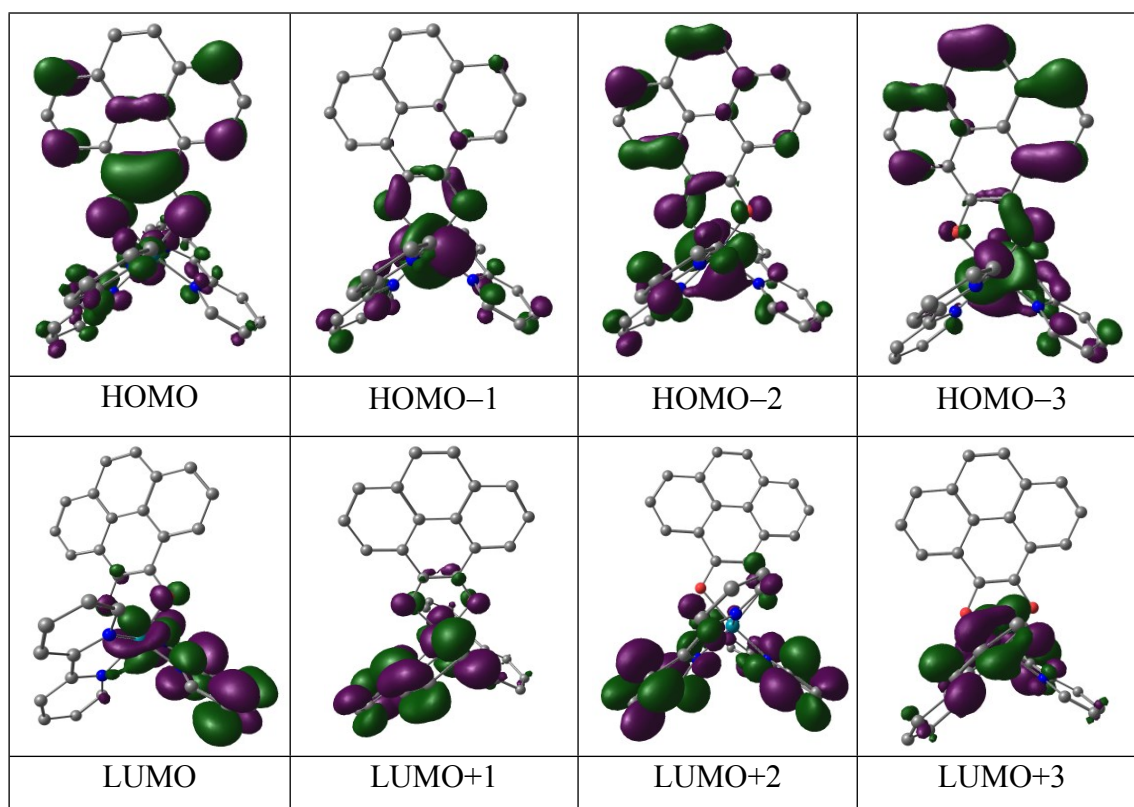

**Table S28** DFT calculated MO composition for  $2^-$  in  $S = 1/2$  state

| MO           | energy (eV) | % composition |     |                |
|--------------|-------------|---------------|-----|----------------|
|              |             | Os            | bpy | L <sup>1</sup> |
| $\alpha$ -MO |             |               |     |                |
| LUMO+5       | 1.784       | 12            | 86  | 2              |
| LUMO+4       | 1.642       | 6             | 92  | 2              |
| LUMO+3       | 1.551       | 4             | 94  | 1              |
| LUMO+2       | 1.373       | 2             | 96  | 2              |
| LUMO+1       | 1.287       | 1             | 2   | 98             |
| LUMO         | 0.670       | 16            | 81  | 4              |
| SOMO         | 0.620       | 17            | 76  | 8              |
| HOMO-1       | -0.186      | 10            | 26  | 64             |
| HOMO-2       | -0.787      | 69            | 20  | 11             |
| HOMO-3       | -1.103      | 55            | 32  | 14             |
| HOMO-4       | -1.423      | 50            | 20  | 31             |
| HOMO-5       | -2.336      | 10            | 5   | 85             |
| $\beta$ -MO  |             |               |     |                |
| LUMO+5       | 1.715       | 7             | 91  | 3              |
| LUMO+4       | 1.602       | 4             | 95  | 1              |
| LUMO+3       | 1.439       | 3             | 95  | 2              |
| LUMO+2       | 1.295       | 1             | 2   | 97             |
| LUMO+1       | 0.940       | 15            | 80  | 5              |
| LUMO         | 0.849       | 14            | 81  | 5              |
| HOMO         | -0.086      | 14            | 26  | 61             |
| HOMO-1       | -0.721      | 69            | 20  | 11             |
| HOMO-2       | -1.026      | 57            | 29  | 14             |
| HOMO-3       | -1.266      | 47            | 20  | 33             |
| HOMO-4       | -2.305      | 7             | 4   | 89             |
| HOMO-5       | -2.305      | 4             | 2   | 94             |

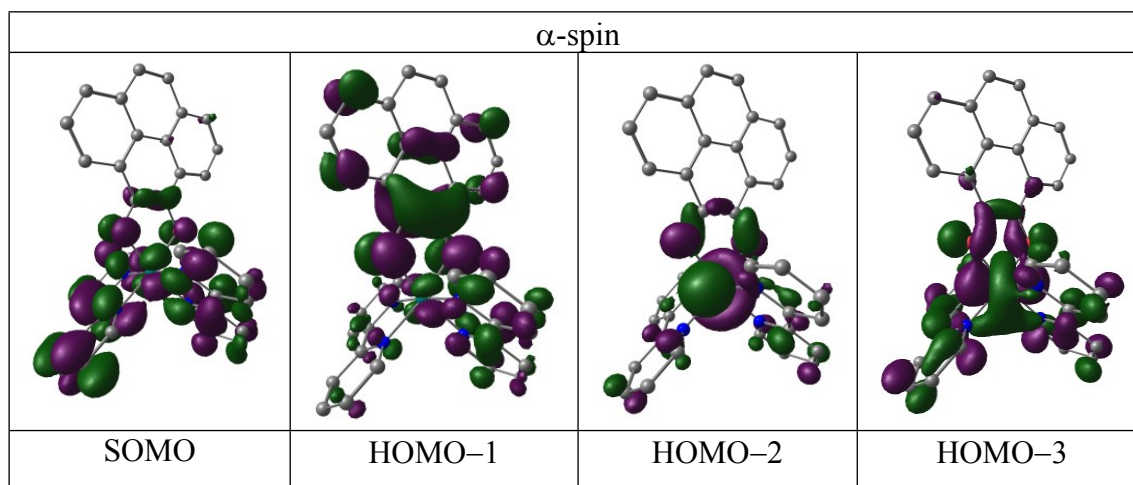

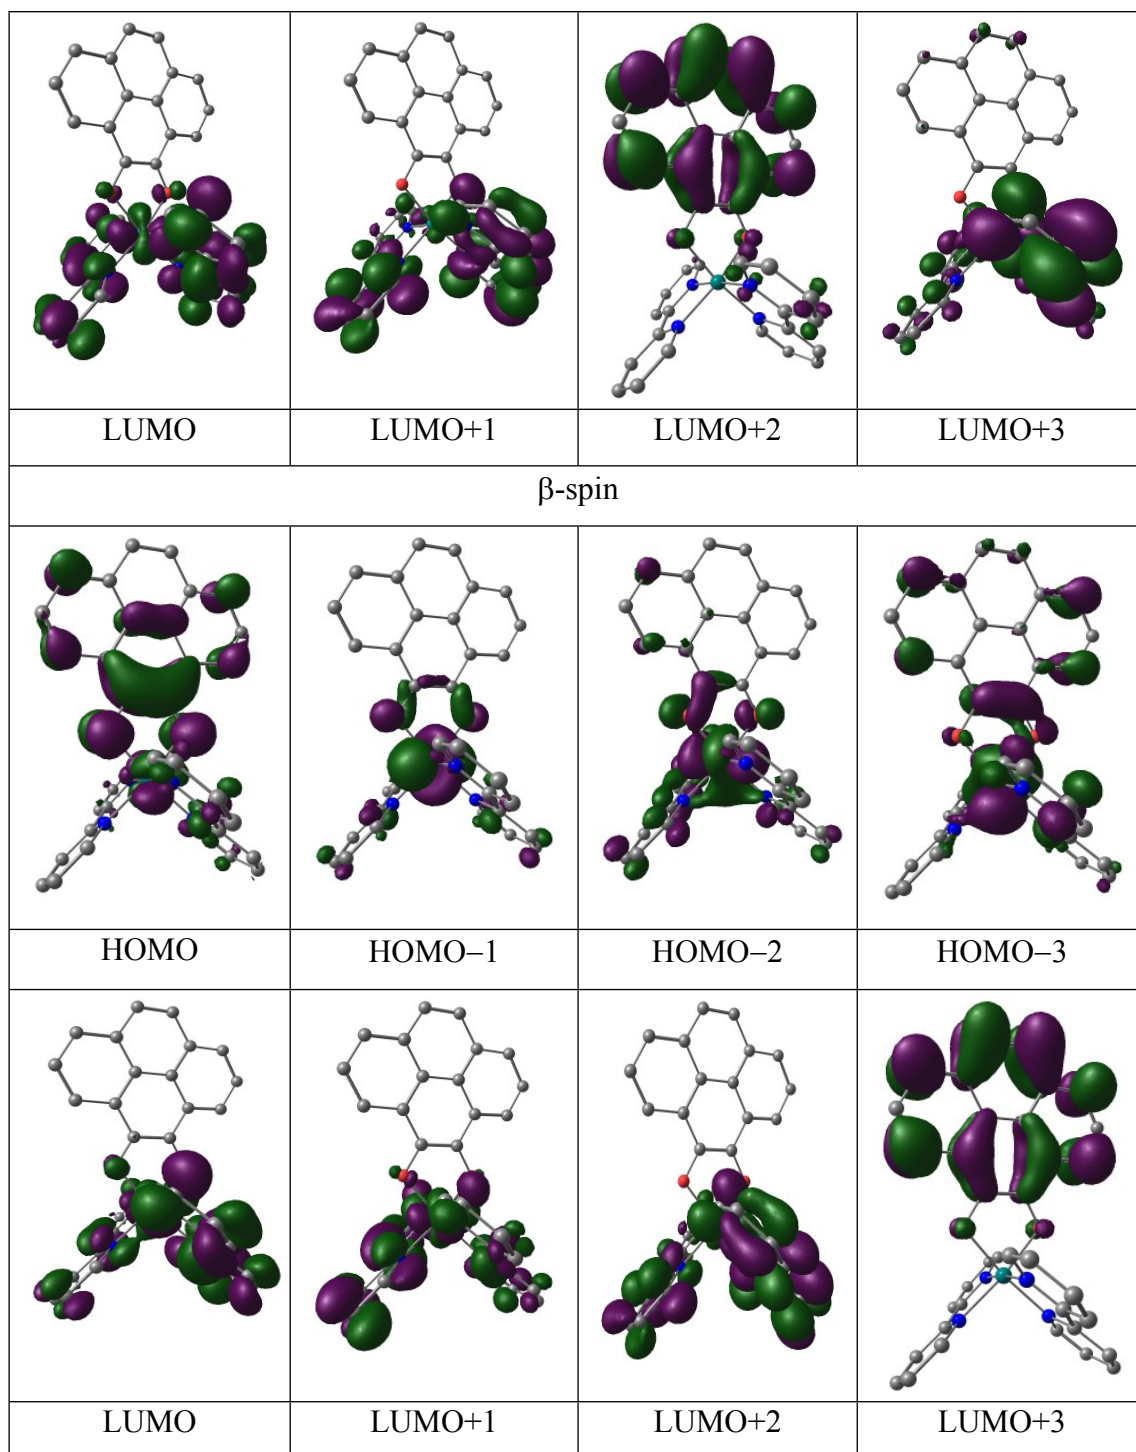



**Table S29** DFT calculated MO composition for  $2^{2-}$  in  $S = 1$  state

| MO           | energy (eV) | % composition |     |                |
|--------------|-------------|---------------|-----|----------------|
|              |             | Os            | bpy | L <sup>1</sup> |
| $\alpha$ -MO |             |               |     |                |
| LUMO+5       | 4.736       | 13            | 86  | 2              |
| LUMO+4       | 4.615       | 5             | 93  | 2              |
| LUMO+3       | 4.564       | 5             | 93  | 1              |
| LUMO+2       | 4.512       | 1             | 3   | 97             |
| LUMO+1       | 4.331       | 2             | 96  | 2              |
| LUMO         | 3.674       | 3             | 10  | 86             |
| SOMO1        | 3.566       | 16            | 71  | 14             |
| SOMO2        | 3.295       | 16            | 77  | 7              |
| HOMO-2       | 2.664       | 19            | 28  | 53             |
| HOMO-3       | 2.270       | 71            | 20  | 9              |
| HOMO-4       | 1.766       | 52            | 37  | 11             |
| HOMO-5       | 1.496       | 46            | 16  | 38             |
| $\beta$ -MO  |             |               |     |                |
| LUMO+5       | 4.670       | 6             | 93  | 1              |
| LUMO+4       | 4.525       | 1             | 5   | 94             |
| LUMO+3       | 4.449       | 2             | 93  | 5              |
| LUMO+2       | 4.080       | 15            | 82  | 4              |
| LUMO+1       | 3.786       | 12            | 80  | 8              |
| LUMO         | 3.732       | 1             | 6   | 93             |
| HOMO         | 2.830       | 27            | 24  | 49             |
| HOMO-1       | 2.398       | 69            | 22  | 9              |
| HOMO-2       | 2.034       | 55            | 36  | 10             |
| HOMO-3       | 1.667       | 39            | 15  | 46             |
| HOMO-4       | 0.221       | 2             | 14  | 83             |
| HOMO-5       | 0.159       | 1             | 15  | 84             |

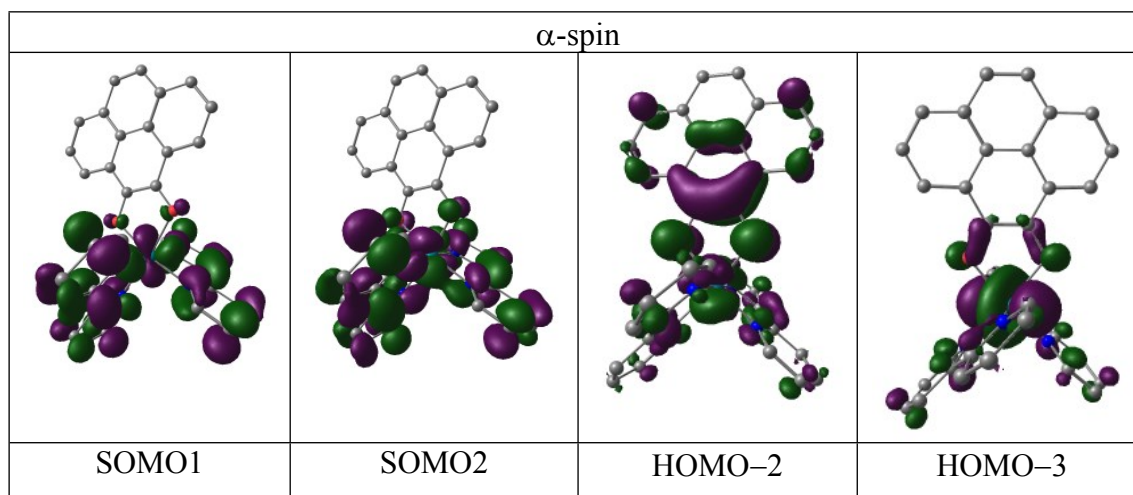

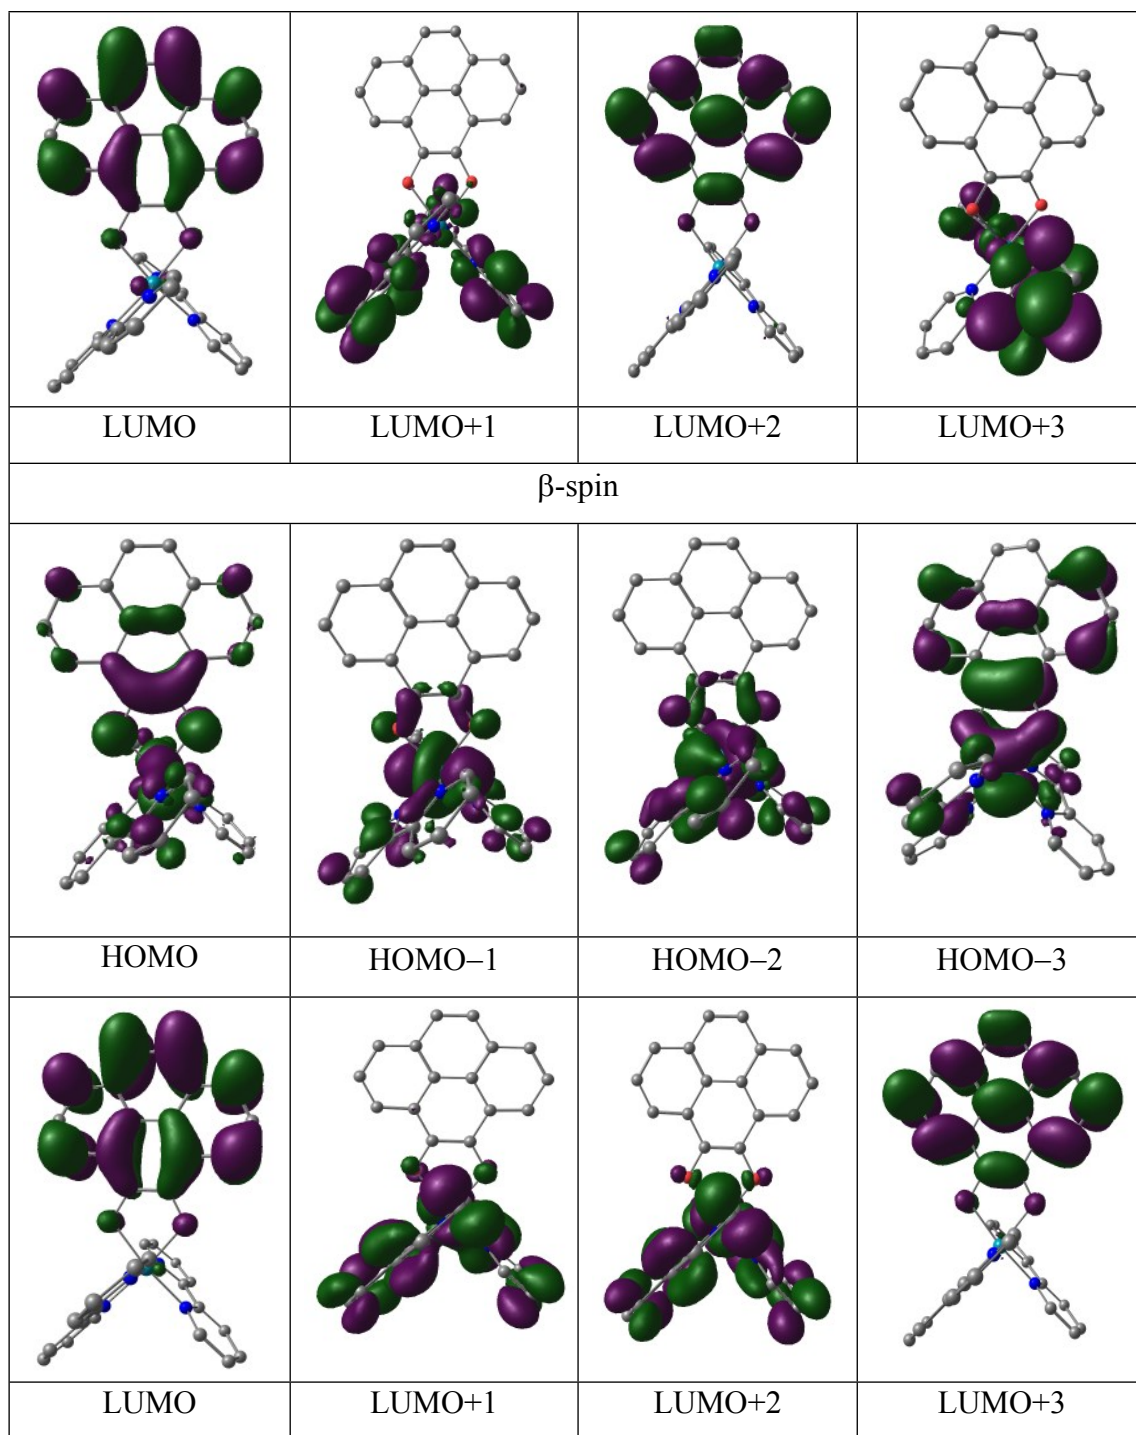

**Table S30** DFT calculated MO composition for  $3^{2+}$  in  $S = 0$  state

| MO     | energy (eV) | % composition |     |                               |
|--------|-------------|---------------|-----|-------------------------------|
|        |             | Ru            | bpy | H <sub>2</sub> L <sup>2</sup> |
| LUMO+5 | -6.964      | 3             | 97  | 0                             |
| LUMO+4 | -7.079      | 2             | 97  | 1                             |
| LUMO+3 | -7.202      | 2             | 97  | 1                             |
| LUMO+2 | -7.826      | 10            | 88  | 2                             |
| LUMO+1 | -7.979      | 6             | 91  | 3                             |
| LUMO   | -8.598      | 16            | 10  | 75                            |
| HOMO   | -10.046     | 23            | 5   | 72                            |
| HOMO-1 | -10.116     | 69            | 10  | 21                            |
| HOMO-2 | -10.420     | 74            | 18  | 9                             |
| HOMO-3 | -10.696     | 18            | 4   | 78                            |
| HOMO-4 | -10.826     | 51            | 11  | 38                            |
| HOMO-5 | -11.554     | 8             | 4   | 89                            |

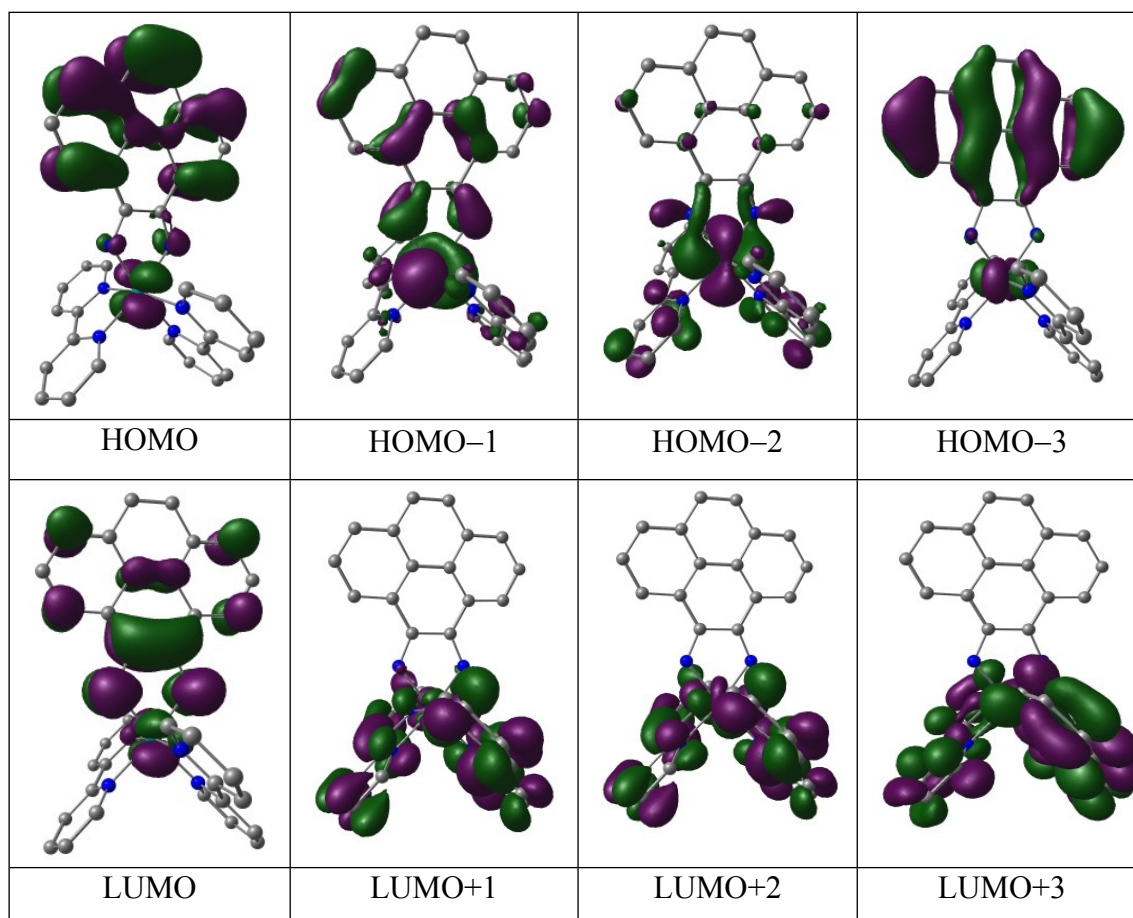



**Table S31** DFT calculated MO composition for  $3^{3+}$  in  $S = 1/2$  state

| MO           | energy (eV) | % composition |     |                               |
|--------------|-------------|---------------|-----|-------------------------------|
|              |             | Ru            | bpy | H <sub>2</sub> L <sup>2</sup> |
| $\alpha$ -MO |             |               |     |                               |
| LUMO+5       | -9.693      | 48            | 24  | 28                            |
| LUMO+4       | -9.949      | 52            | 39  | 9                             |
| LUMO+3       | -10.230     | 98            | 98  | 98                            |
| LUMO+2       | -10.493     | 8             | 92  | 1                             |
| LUMO+1       | -10.551     | 3             | 96  | 1                             |
| LUMO         | -11.904     | 14            | 4   | 82                            |
| SOMO         | -13.452     | 35            | 5   | 60                            |
| HOMO-1       | -13.664     | 52            | 10  | 38                            |
| HOMO-2       | -13.741     | 66            | 16  | 19                            |
| HOMO-3       | -14.002     | 31            | 12  | 57                            |
| HOMO-4       | -14.151     | 7             | 88  | 5                             |
| HOMO-5       | -14.213     | 9             | 87  | 4                             |
| $\beta$ -MO  |             |               |     |                               |
| LUMO+5       | -9.682      | 50            | 41  | 8                             |
| LUMO+4       | -10.016     | 1             | 1   | 98                            |
| LUMO+3       | -10.475     | 8             | 91  | 1                             |
| LUMO+2       | -10.535     | 3             | 95  | 1                             |
| LUMO+1       | -11.777     | 18            | 5   | 78                            |
| LUMO         | -13.164     | 47            | 6   | 46                            |
| HOMO         | -13.221     | 59            | 8   | 33                            |
| HOMO-1       | -13.480     | 75            | 16  | 9                             |
| HOMO-2       | -13.900     | 15            | 4   | 81                            |
| HOMO-3       | -13.958     | 47            | 17  | 36                            |
| HOMO-4       | -14.185     | 7             | 90  | 4                             |
| HOMO-5       | -14.206     | 2             | 97  | 1                             |

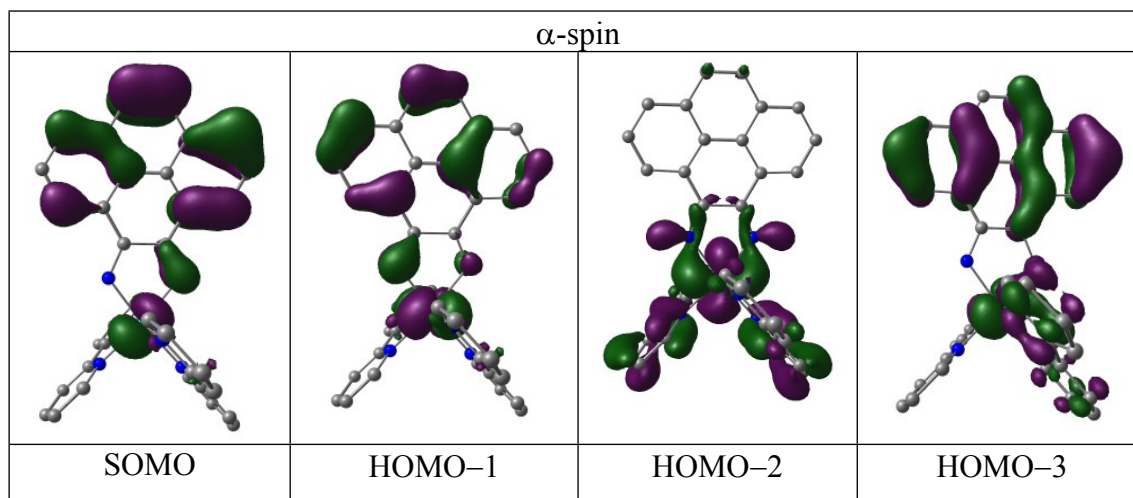

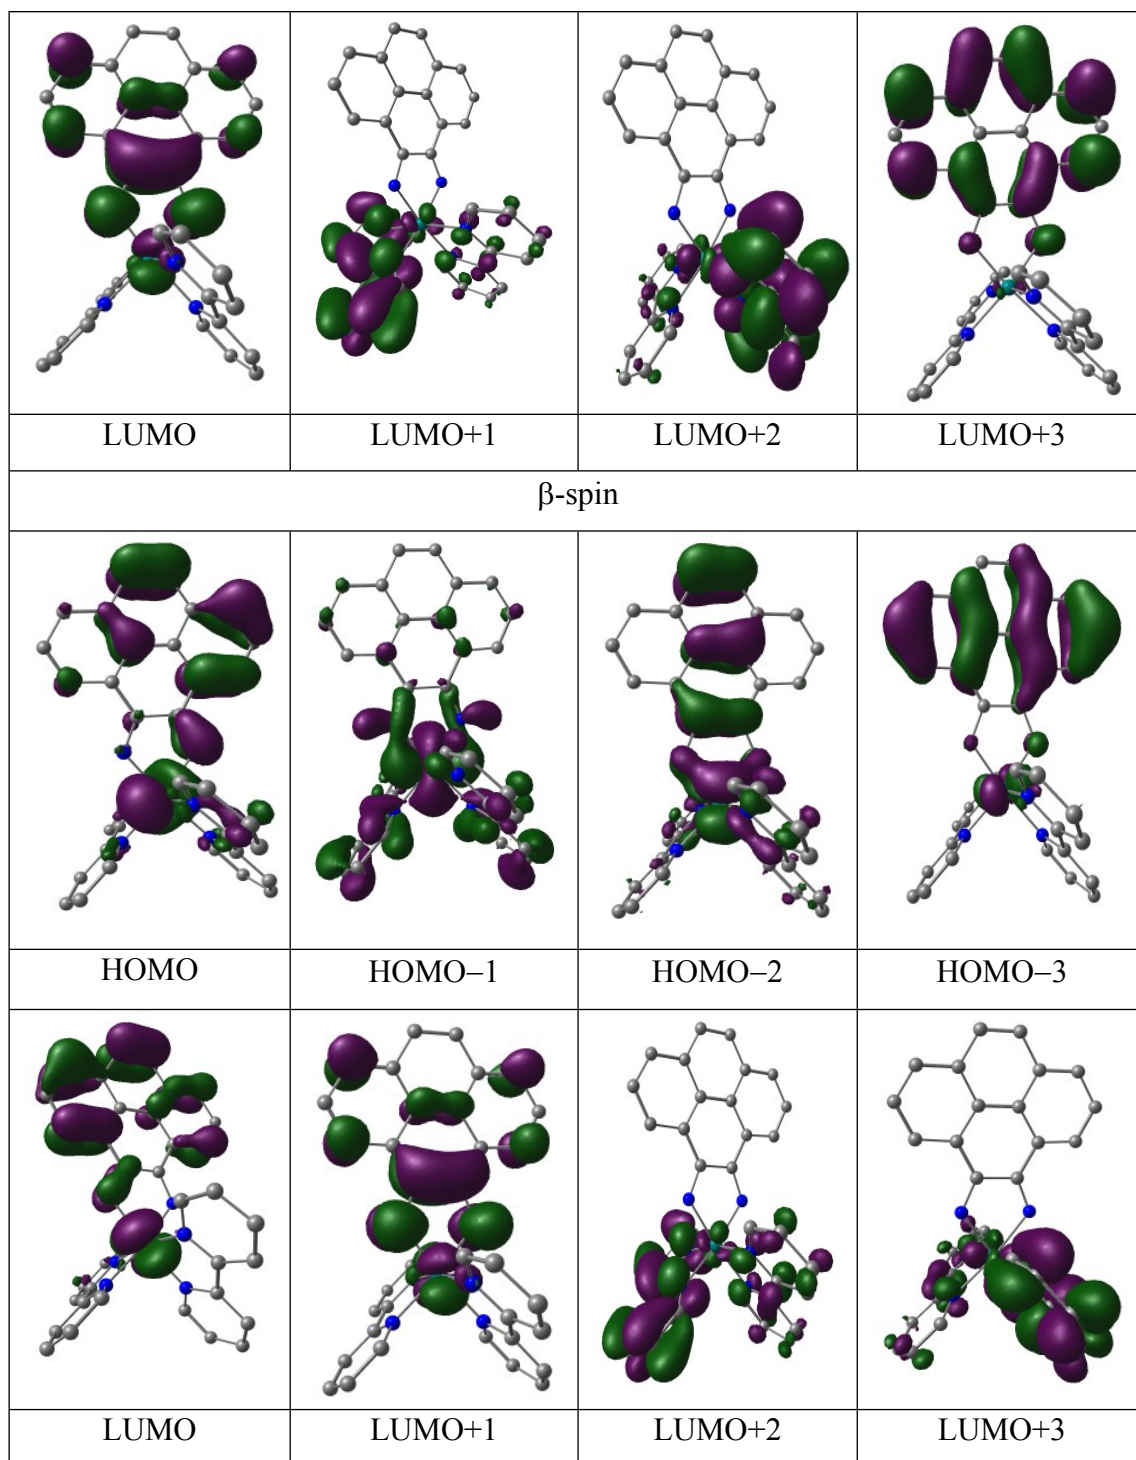

**Table S32** DFT calculated MO composition for  $3^+$  in  $S = 1/2$  state

| MO           | energy (eV) | % composition |     |                               |
|--------------|-------------|---------------|-----|-------------------------------|
|              |             | Ru            | bpy | H <sub>2</sub> L <sup>2</sup> |
| $\alpha$ -MO |             |               |     |                               |
| LUMO+5       | -4.147      | 2             | 98  | 0                             |
| LUMO+4       | -4.171      | 3             | 96  | 0                             |
| LUMO+3       | -4.226      | 5             | 94  | 1                             |
| LUMO+2       | -4.429      | 2             | 97  | 1                             |
| LUMO+1       | -5.134      | 11            | 88  | 1                             |
| LUMO         | -5.214      | 11            | 73  | 16                            |
| SOMO         | -5.446      | 9             | 28  | 63                            |
| HOMO-1       | -6.899      | 74            | 9   | 17                            |
| HOMO-2       | -7.064      | 34            | 6   | 61                            |
| HOMO-3       | -7.297      | 73            | 17  | 10                            |
| HOMO-4       | -7.704      | 16            | 3   | 80                            |
| HOMO-5       | -7.711      | 47            | 8   | 45                            |
| $\beta$ -MO  |             |               |     |                               |
| LUMO+5       | -4.138      | 3             | 97  | 0                             |
| LUMO+4       | -4.209      | 6             | 94  | 1                             |
| LUMO+3       | -4.413      | 2             | 97  | 1                             |
| LUMO+2       | -4.908      | 16            | 13  | 72                            |
| LUMO+1       | -5.062      | 10            | 88  | 1                             |
| LUMO         | -5.211      | 1             | 91  | 8                             |
| HOMO         | -6.815      | 69            | 9   | 22                            |
| HOMO-1       | -6.959      | 34            | 6   | 60                            |
| HOMO-2       | -7.266      | 73            | 16  | 11                            |
| HOMO-3       | -7.591      | 50            | 8   | 42                            |
| HOMO-4       | -7.660      | 20            | 4   | 76                            |
| HOMO-5       | -8.413      | 9             | 4   | 87                            |

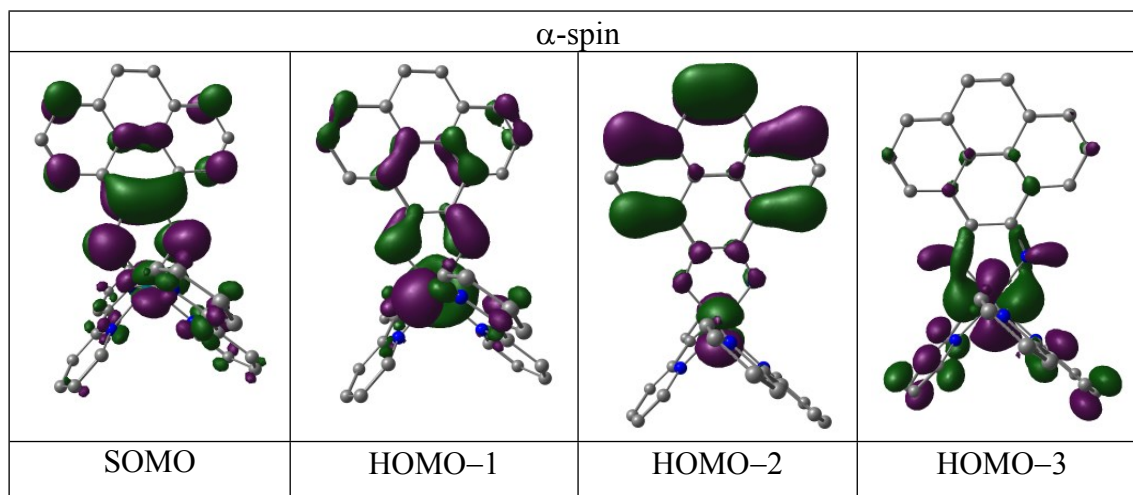

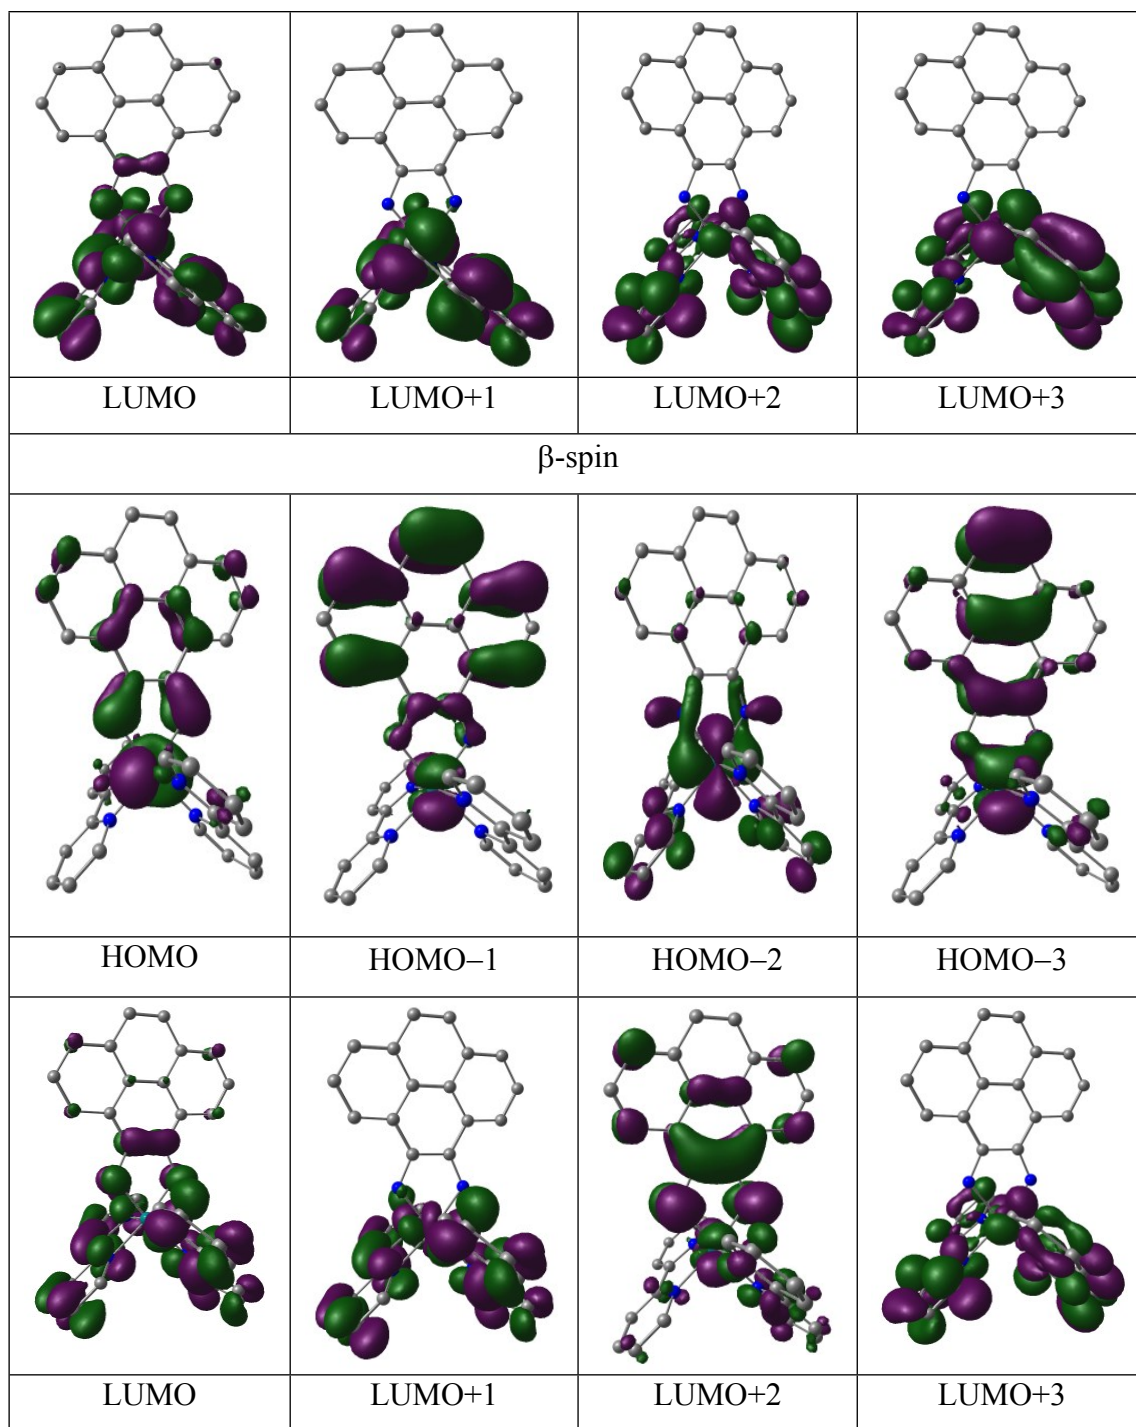

**Table S33** DFT calculated MO composition for **3** in  $S = 0$  state

| MO     | energy (eV) | % composition |     |                               |
|--------|-------------|---------------|-----|-------------------------------|
|        |             | Ru            | bpy | H <sub>2</sub> L <sup>2</sup> |
| LUMO+5 | -1.199      | 2             | 61  | 36                            |
| LUMO+4 | -1.227      | 2             | 55  | 44                            |
| LUMO+3 | -1.290      | 6             | 92  | 2                             |
| LUMO+2 | -1.496      | 3             | 96  | 1                             |
| LUMO+1 | -2.140      | 13            | 70  | 17                            |
| LUMO   | -2.180      | 12            | 76  | 12                            |
| HOMO   | -2.429      | 5             | 45  | 50                            |
| HOMO-1 | -3.828      | 72            | 10  | 18                            |
| HOMO-2 | -4.246      | 51            | 10  | 39                            |
| HOMO-3 | -4.282      | 74            | 18  | 8                             |
| HOMO-4 | -4.880      | 28            | 6   | 66                            |
| HOMO-5 | -4.966      | 13            | 4   | 84                            |

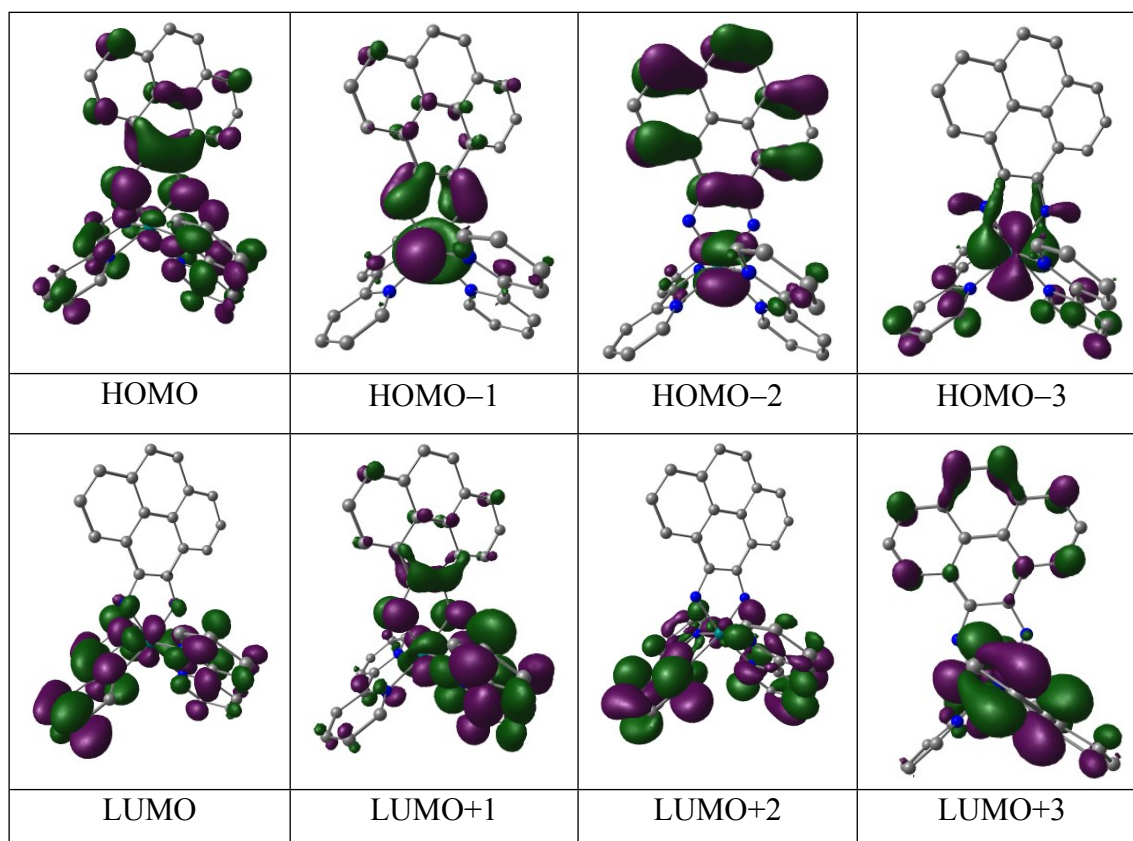



**Table S34** DFT calculated MO composition for  $3^-$  in  $S = 1/2$  state

| MO           | energy (eV) | % composition |     |                               |
|--------------|-------------|---------------|-----|-------------------------------|
|              |             | Ru            | bpy | H <sub>2</sub> L <sup>2</sup> |
| $\alpha$ -MO |             |               |     |                               |
| LUMO+5       | 1.824       | 4             | 95  | 1                             |
| LUMO+4       | 1.784       | 5             | 94  | 1                             |
| LUMO+3       | 1.736       | 6             | 93  | 1                             |
| LUMO+2       | 1.528       | 3             | 95  | 2                             |
| LUMO+1       | 1.170       | 1             | 1   | 98                            |
| LUMO         | 0.765       | 22            | 46  | 32                            |
| SOMO         | 0.647       | 12            | 86  | 2                             |
| HOMO-1       | 0.313       | 4             | 57  | 39                            |
| HOMO-2       | -0.674      | 73            | 10  | 16                            |
| HOMO-3       | -1.172      | 72            | 21  | 7                             |
| HOMO-4       | -1.265      | 58            | 14  | 28                            |
| HOMO-5       | -2.348      | 9             | 4   | 87                            |
| $\beta$ -MO  |             |               |     |                               |
| LUMO+5       | 1.902       | 3             | 47  | 50                            |
| LUMO+4       | 1.822       | 7             | 92  | 2                             |
| LUMO+3       | 1.605       | 3             | 95  | 2                             |
| LUMO+2       | 1.137       | 3             | 15  | 82                            |
| LUMO+1       | 1.086       | 8             | 76  | 16                            |
| LUMO         | 1.005       | 10            | 85  | 5                             |
| HOMO         | 0.264       | 17            | 15  | 68                            |
| HOMO-1       | -0.718      | 75            | 11  | 14                            |
| HOMO-2       | -1.080      | 74            | 20  | 6                             |
| HOMO-3       | -1.397      | 58            | 13  | 29                            |
| HOMO-4       | -2.404      | 7             | 5   | 87                            |
| HOMO-5       | -2.438      | 7             | 7   | 86                            |

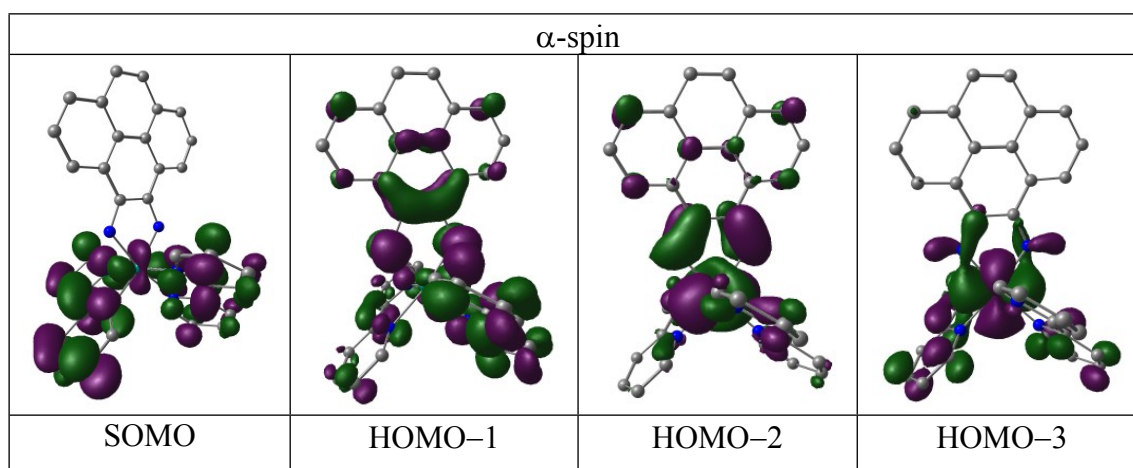

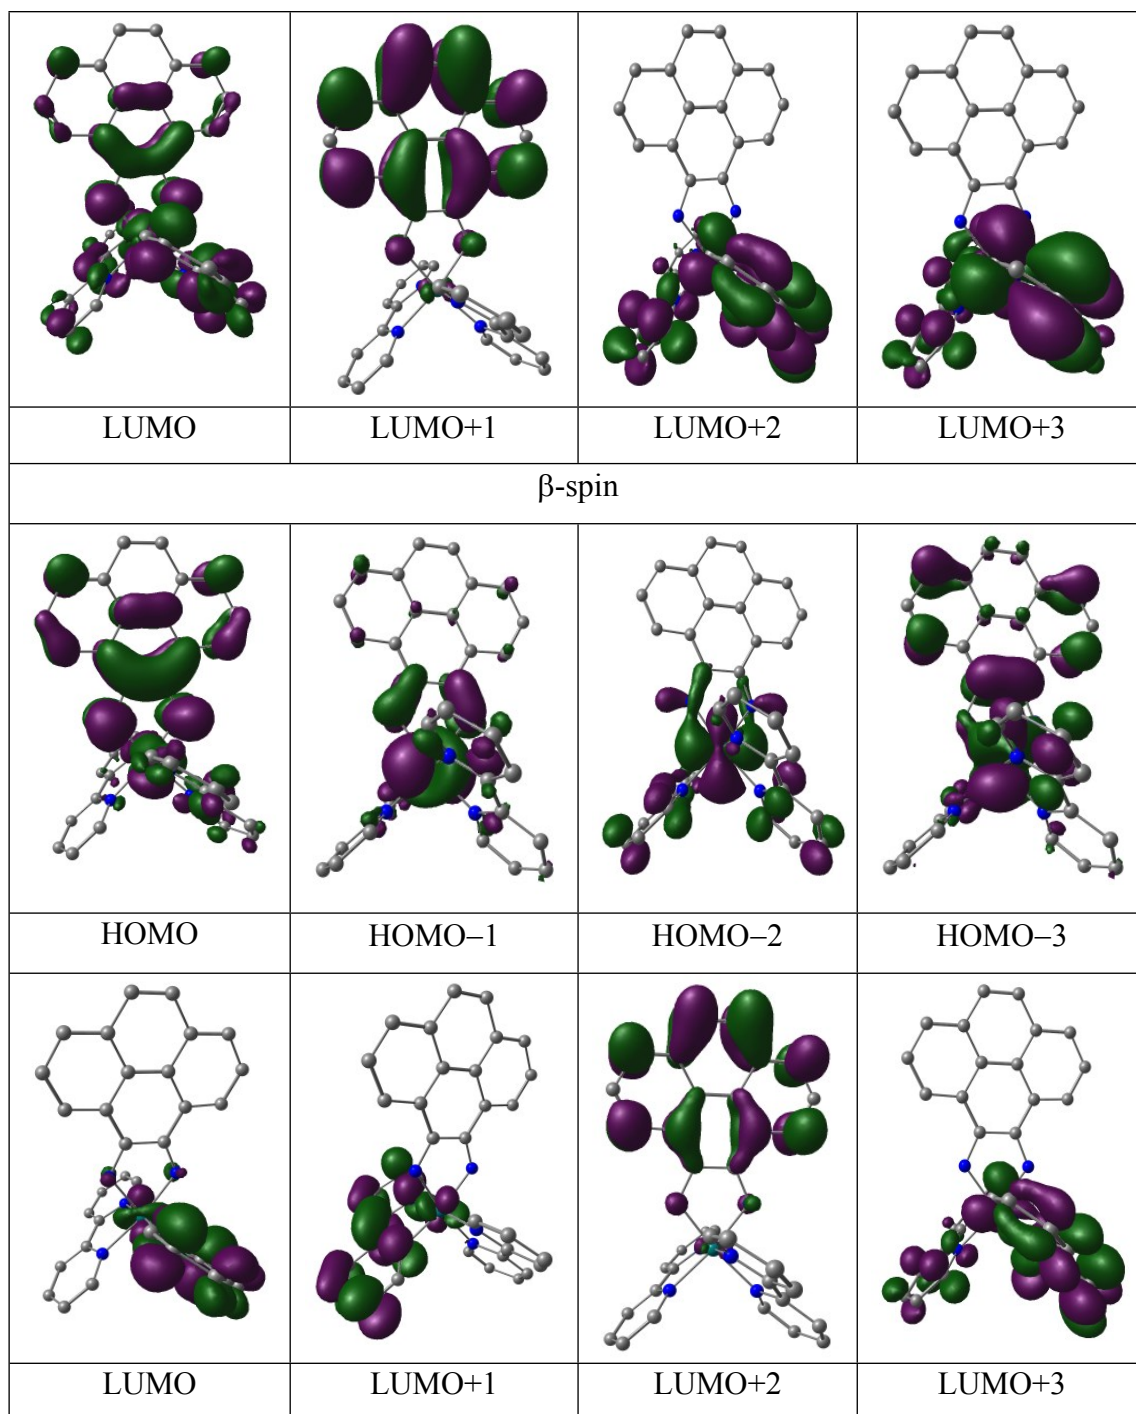

**Table S35** DFT calculated MO composition for  $3^{2-}$  in  $S = 1$  state

| MO           | energy (eV) | % composition |     |                               |
|--------------|-------------|---------------|-----|-------------------------------|
|              |             | Ru            | bpy | H <sub>2</sub> L <sup>2</sup> |
| $\alpha$ -MO |             |               |     |                               |
| LUMO+5       | 4.757       | 4             | 95  | 1                             |
| LUMO+4       | 4.711       | 5             | 93  | 1                             |
| LUMO+3       | 4.626       | 8             | 91  | 1                             |
| LUMO+2       | 4.549       | 2             | 2   | 96                            |
| LUMO+1       | 4.432       | 6             | 92  | 2                             |
| LUMO         | 3.726       | 1             | 1   | 98                            |
| SOMO1        | 3.559       | 20            | 55  | 25                            |
| SOMO2        | 3.357       | 13            | 81  | 6                             |
| HOMO-2       | 3.093       | 5             | 52  | 43                            |
| HOMO-3       | 2.318       | 75            | 11  | 14                            |
| HOMO-4       | 1.776       | 72            | 22  | 6                             |
| HOMO-5       | 1.559       | 59            | 15  | 26                            |
| $\beta$ -MO  |             |               |     |                               |
| LUMO+5       | 4.735       | 8             | 91  | 1                             |
| LUMO+4       | 4.567       | 3             | 3   | 94                            |
| LUMO+3       | 4.533       | 6             | 91  | 3                             |
| LUMO+2       | 4.022       | 14            | 77  | 9                             |
| LUMO+1       | 3.901       | 12            | 84  | 4                             |
| LUMO         | 3.737       | 2             | 2   | 96                            |
| HOMO         | 3.325       | 15            | 26  | 58                            |
| HOMO-1       | 2.453       | 75            | 11  | 14                            |
| HOMO-2       | 2.053       | 73            | 22  | 6                             |
| HOMO-3       | 1.801       | 54            | 15  | 32                            |
| HOMO-4       | 0.495       | 7             | 16  | 77                            |
| HOMO-5       | 0.304       | 1             | 22  | 77                            |

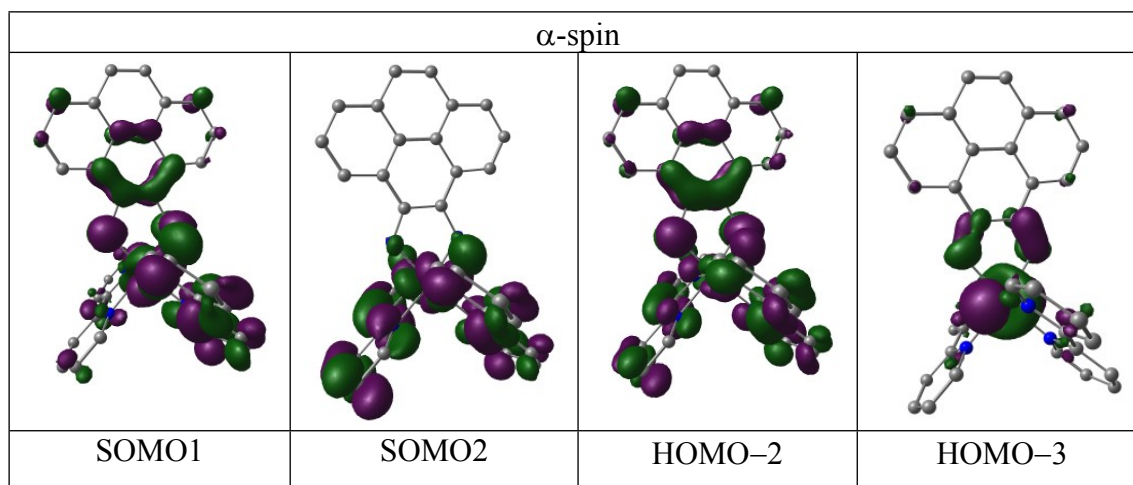



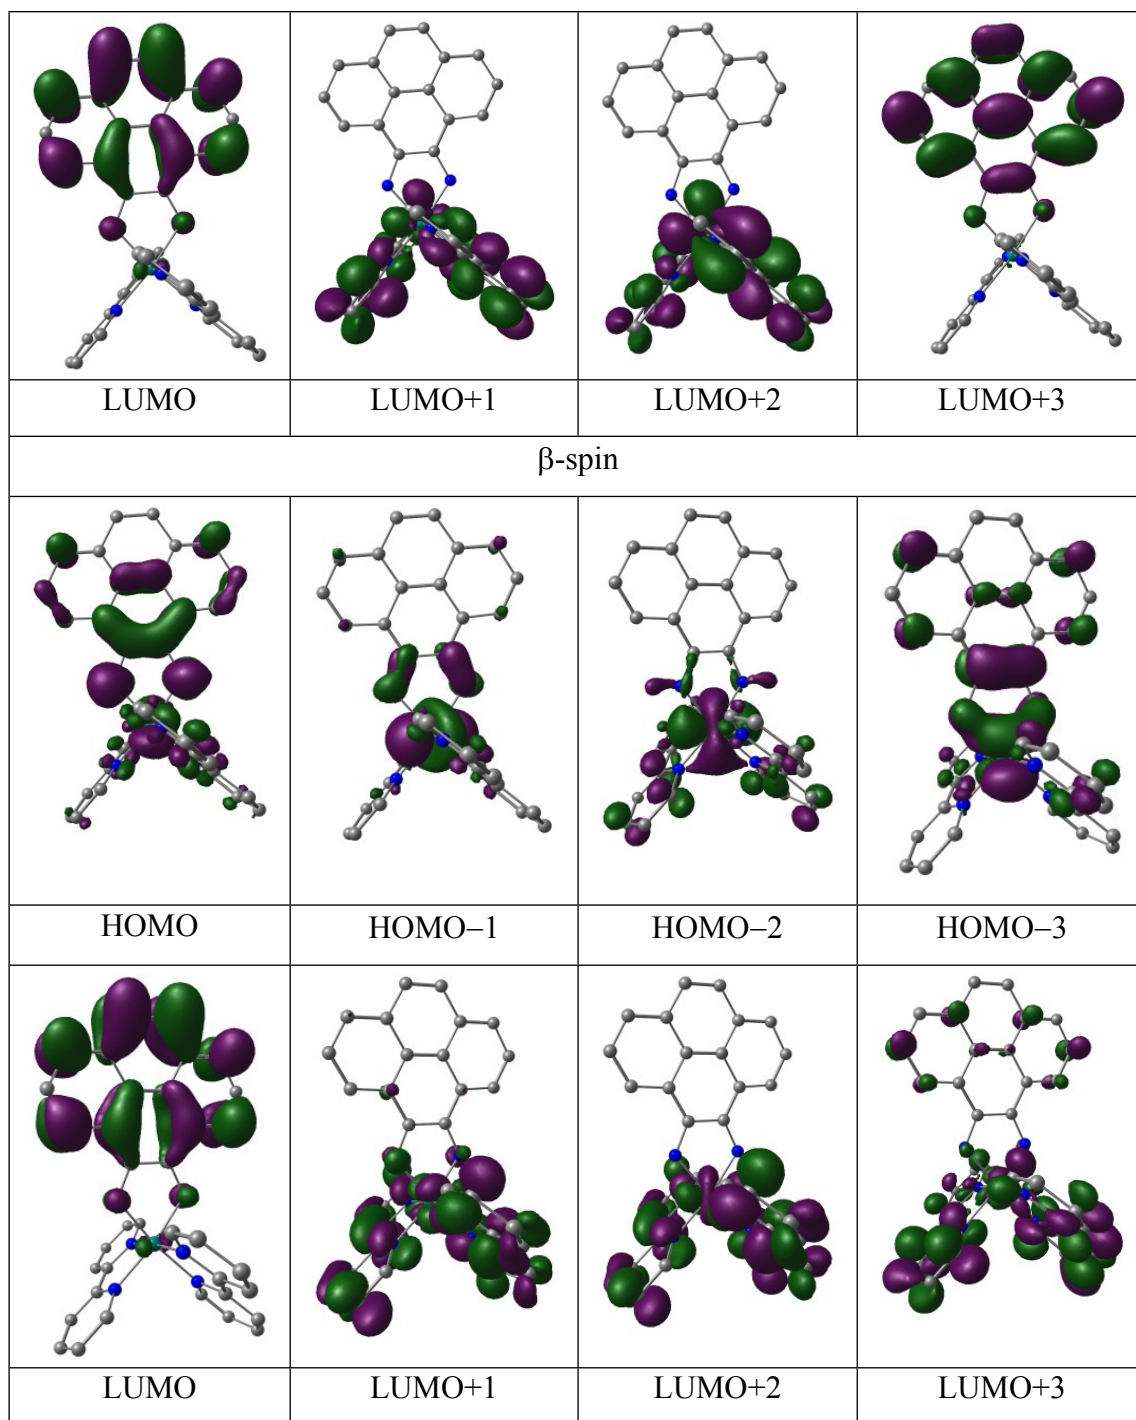

**Table S36** DFT calculated MO composition for  $4^{2+}$  in  $S = 0$  state

| MO     | energy (eV) | % composition |     |                               |
|--------|-------------|---------------|-----|-------------------------------|
|        |             | Os            | bpy | H <sub>2</sub> L <sup>2</sup> |
| LUMO+5 | -7.011      | 3             | 96  | 1                             |
| LUMO+4 | -7.164      | 2             | 97  | 1                             |
| LUMO+3 | -7.255      | 3             | 96  | 1                             |
| LUMO+2 | -7.830      | 13            | 85  | 3                             |
| LUMO+1 | -8.017      | 11            | 80  | 9                             |
| LUMO   | -8.544      | 15            | 21  | 64                            |
| HOMO   | -9.928      | 21            | 7   | 72                            |
| HOMO-1 | -9.965      | 65            | 13  | 22                            |
| HOMO-2 | -10.317     | 67            | 23  | 11                            |
| HOMO-3 | -10.581     | 16            | 5   | 79                            |
| HOMO-4 | -10.769     | 42            | 12  | 46                            |
| HOMO-5 | -11.494     | 7             | 4   | 89                            |

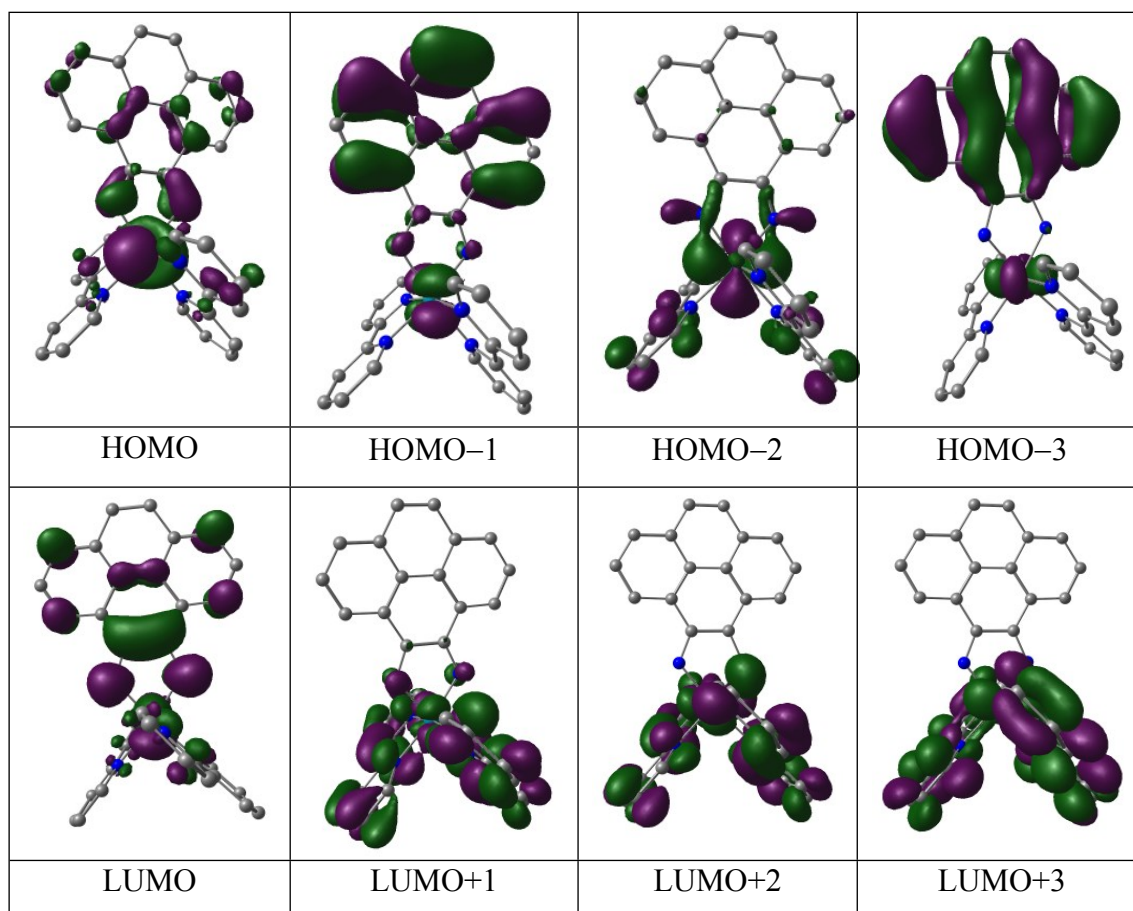

**Table S37** DFT calculated MO composition for  $4^{3+}$  in  $S = 1/2$  state

| MO           | energy (eV) | % composition |     |                               |
|--------------|-------------|---------------|-----|-------------------------------|
|              |             | Os            | bpy | H <sub>2</sub> L <sup>2</sup> |
| $\alpha$ -MO |             |               |     |                               |
| LUMO+5       | -9.704      | 2             | 97  | 1                             |
| LUMO+4       | -9.823      | 2             | 97  | 1                             |
| LUMO+3       | -10.017     | 1             | 2   | 97                            |
| LUMO+2       | -10.637     | 9             | 89  | 2                             |
| LUMO+1       | -10.768     | 5             | 94  | 2                             |
| LUMO         | -11.827     | 17            | 7   | 76                            |
| SOMO         | -13.211     | 22            | 5   | 73                            |
| HOMO-1       | -13.536     | 36            | 9   | 55                            |
| HOMO-2       | -13.673     | 68            | 20  | 12                            |
| HOMO-3       | -13.912     | 42            | 11  | 46                            |
| HOMO-4       | -14.202     | 42            | 30  | 28                            |
| HOMO-5       | -14.351     | 7             | 89  | 5                             |
| $\beta$ -MO  |             |               |     |                               |
| LUMO+5       | -9.804      | 2             | 95  | 3                             |
| LUMO+4       | -9.862      | 1             | 9   | 90                            |
| LUMO+3       | -10.613     | 10            | 88  | 2                             |
| LUMO+2       | -10.743     | 5             | 92  | 2                             |
| LUMO+1       | -11.694     | 20            | 8   | 71                            |
| LUMO         | -12.947     | 51            | 9   | 39                            |
| HOMO         | -13.033     | 43            | 8   | 48                            |
| HOMO-1       | -13.444     | 68            | 20  | 12                            |
| HOMO-2       | -13.735     | 15            | 4   | 81                            |
| HOMO-3       | -13.946     | 45            | 14  | 41                            |
| HOMO-4       | -14.338     | 2             | 96  | 2                             |
| HOMO-5       | -14.374     | 1             | 98  | 1                             |

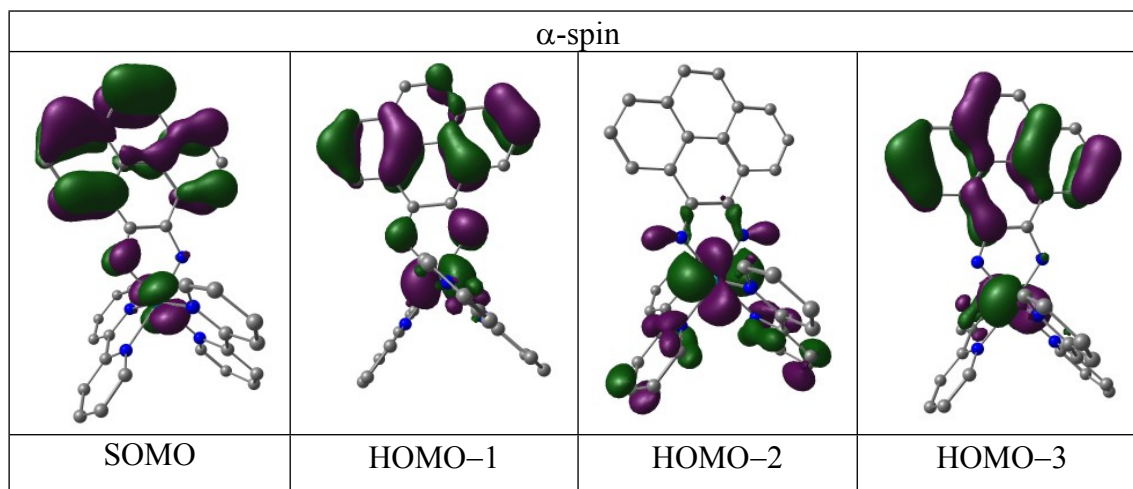

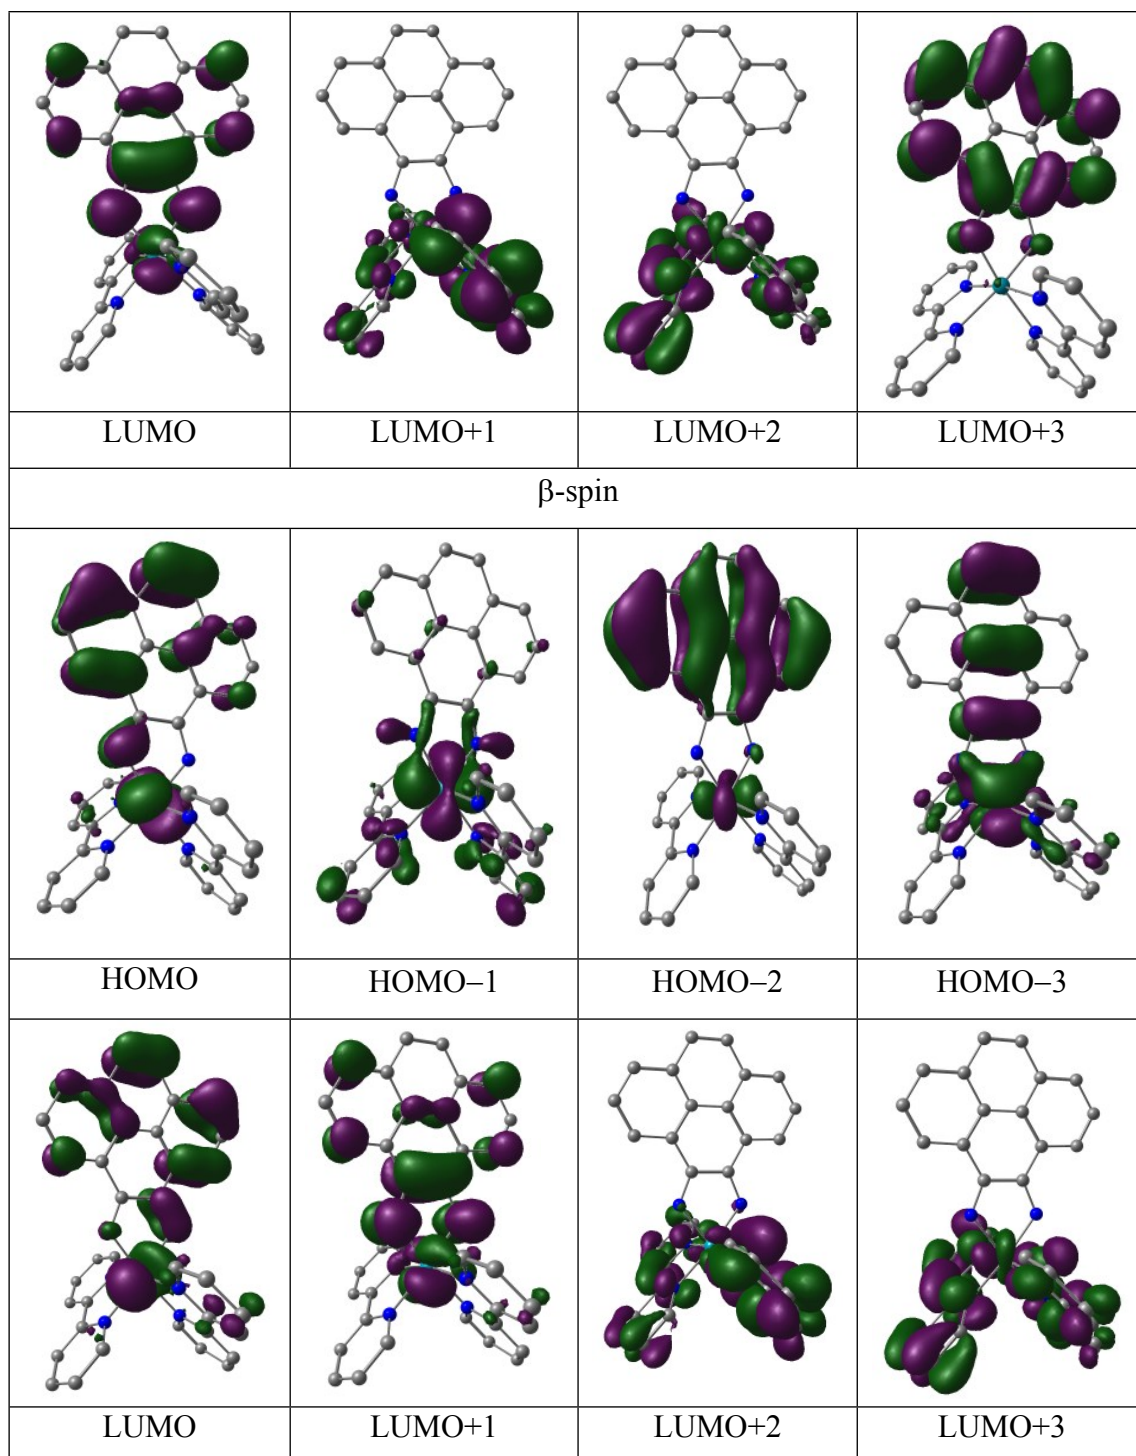

**Table S38** DFT calculated MO composition for  $4^+$  in  $S = 1/2$  state

| MO           | energy (eV) | % composition |     |                               |
|--------------|-------------|---------------|-----|-------------------------------|
|              |             | Os            | bpy | H <sub>2</sub> L <sup>2</sup> |
| $\alpha$ -MO |             |               |     |                               |
| LUMO+5       | -4.153      | 7             | 92  | 1                             |
| LUMO+4       | -4.158      | 3             | 97  | 1                             |
| LUMO+3       | -4.189      | 3             | 94  | 3                             |
| LUMO+2       | -4.414      | 2             | 97  | 1                             |
| LUMO+1       | -5.067      | 14            | 84  | 2                             |
| LUMO         | -5.194      | 16            | 64  | 20                            |
| SOMO         | -5.538      | 10            | 38  | 52                            |
| HOMO-1       | -6.802      | 70            | 13  | 17                            |
| HOMO-2       | -7.070      | 31            | 8   | 61                            |
| HOMO-3       | -7.258      | 66            | 24  | 10                            |
| HOMO-4       | -7.786      | 10            | 3   | 87                            |
| HOMO-5       | -7.806      | 37            | 9   | 55                            |
| $\beta$ -MO  |             |               |     |                               |
| LUMO+5       | -4.119      | 5             | 94  | 1                             |
| LUMO+4       | -4.139      | 5             | 93  | 2                             |
| LUMO+3       | -4.388      | 3             | 96  | 1                             |
| LUMO+2       | -4.967      | 19            | 32  | 49                            |
| LUMO+1       | -4.974      | 13            | 85  | 2                             |
| LUMO         | -5.279      | 2             | 74  | 24                            |
| HOMO         | -6.730      | 67            | 13  | 20                            |
| HOMO-1       | -6.969      | 33            | 8   | 58                            |
| HOMO-2       | -7.231      | 67            | 23  | 10                            |
| HOMO-3       | -7.687      | 38            | 9   | 53                            |
| HOMO-4       | -7.749      | 12            | 4   | 84                            |
| HOMO-5       | -8.546      | 7             | 5   | 88                            |

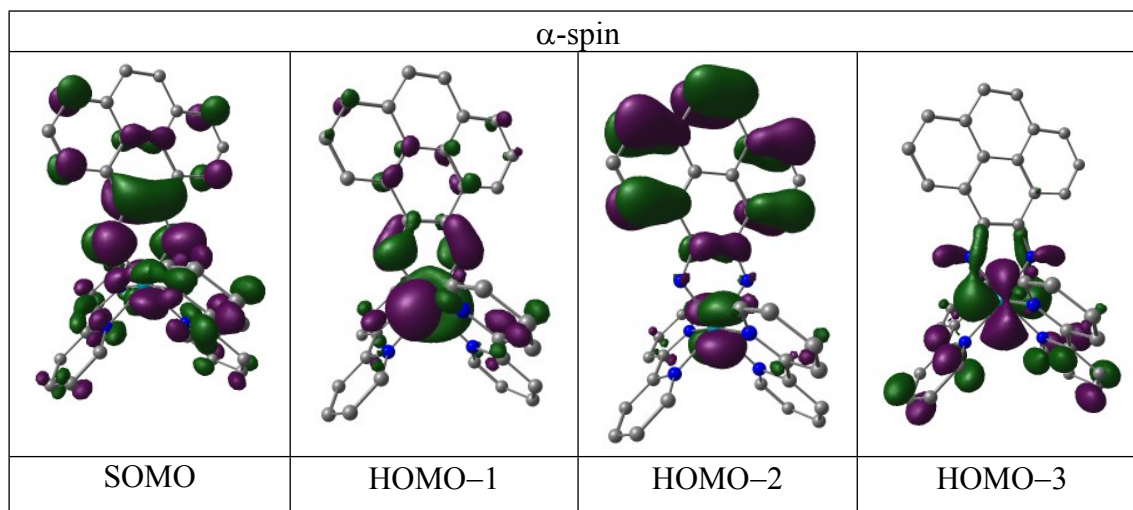



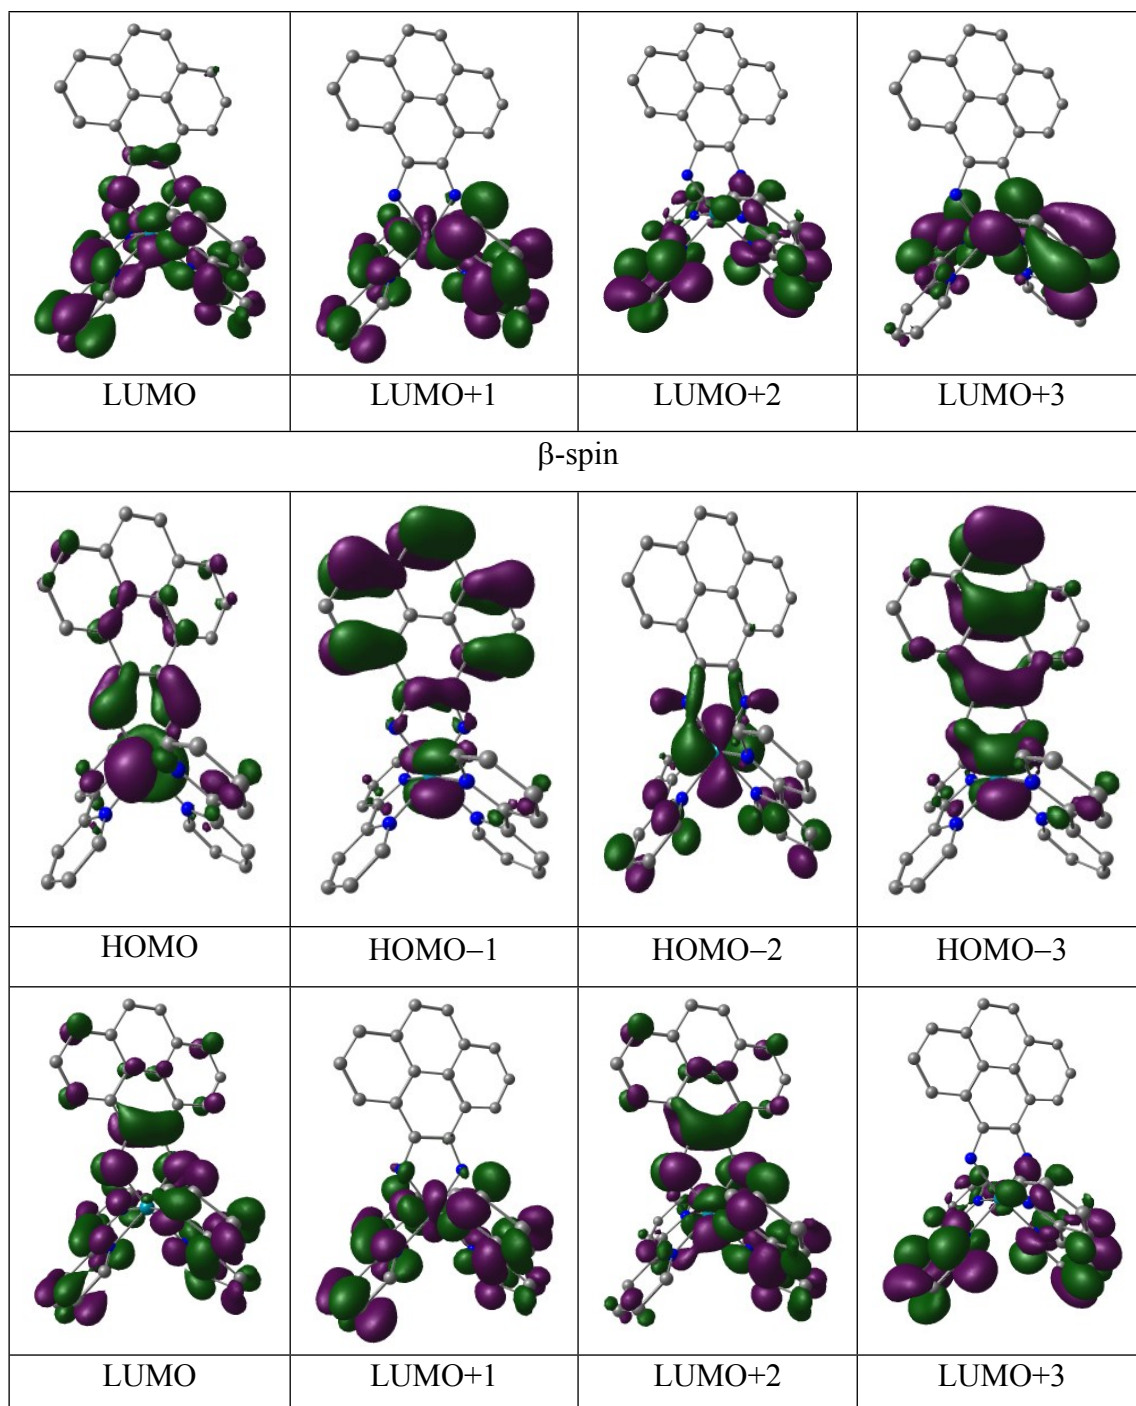

**Table S39** DFT calculated MO composition for **4** in  $S = 0$  state

| MO     | energy (eV) | % composition |     |                               |
|--------|-------------|---------------|-----|-------------------------------|
|        |             | Os            | bpy | H <sub>2</sub> L <sup>2</sup> |
| LUMO+5 | -1.193      | 6             | 92  | 2                             |
| LUMO+4 | -1.211      | 6             | 80  | 13                            |
| LUMO+3 | -1.295      | 0             | 21  | 79                            |
| LUMO+2 | -1.483      | 3             | 96  | 2                             |
| LUMO+1 | -2.089      | 16            | 68  | 16                            |
| LUMO   | -2.126      | 15            | 71  | 13                            |
| HOMO   | -2.539      | 6             | 49  | 46                            |
| HOMO-1 | -3.741      | 68            | 14  | 17                            |
| HOMO-2 | -4.243      | 48            | 15  | 38                            |
| HOMO-3 | -4.253      | 63            | 24  | 13                            |
| HOMO-4 | -4.976      | 22            | 7   | 71                            |
| HOMO-5 | -5.059      | 9             | 4   | 87                            |

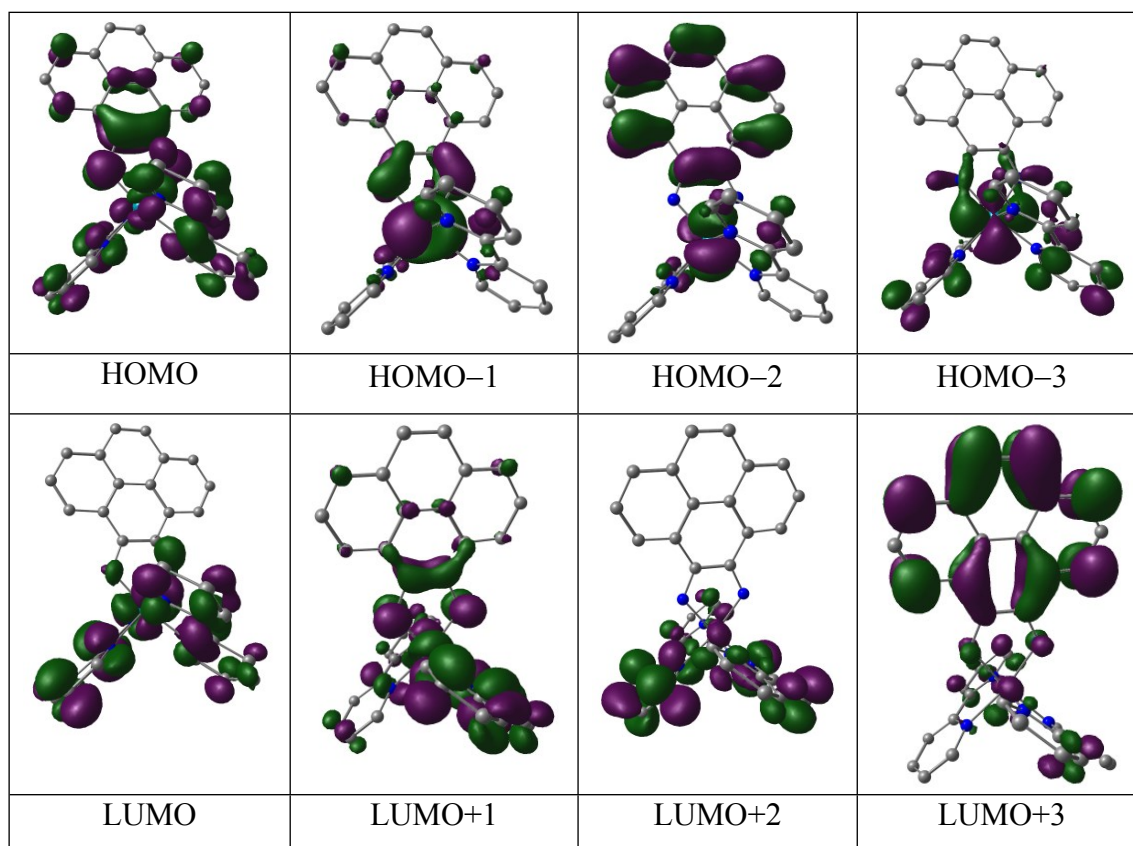

**Table S40.** DFT calculated MO composition for **4<sup>-</sup>** in  $S = 1/2$  state

| MO           | energy (eV) | % composition |     |                               |
|--------------|-------------|---------------|-----|-------------------------------|
|              |             | Os            | bpy | H <sub>2</sub> L <sup>2</sup> |
| $\alpha$ -MO |             |               |     |                               |
| LUMO+5       | 1.851       | 4             | 75  | 20                            |
| LUMO+4       | 1.836       | 8             | 90  | 2                             |
| LUMO+3       | 1.766       | 4             | 94  | 1                             |
| LUMO+2       | 1.528       | 3             | 95  | 2                             |
| LUMO+1       | 1.119       | 1             | 2   | 97                            |
| LUMO         | 0.856       | 23            | 51  | 27                            |
| SOMO         | 0.716       | 14            | 83  | 3                             |
| HOMO-1       | 0.221       | 5             | 56  | 39                            |
| HOMO-2       | -0.615      | 69            | 15  | 17                            |
| HOMO-3       | -1.189      | 63            | 29  | 8                             |
| HOMO-4       | -1.343      | 46            | 17  | 37                            |
| HOMO-5       | -2.447      | 7             | 4   | 89                            |
| $\beta$ -MO  |             |               |     |                               |
| LUMO+5       | 1.868       | 8             | 90  | 2                             |
| LUMO+4       | 1.851       | 5             | 84  | 11                            |
| LUMO+3       | 1.601       | 3             | 95  | 2                             |
| LUMO+2       | 1.144       | 10            | 57  | 33                            |
| LUMO+1       | 1.072       | 4             | 31  | 64                            |
| LUMO         | 1.023       | 14            | 76  | 10                            |
| HOMO         | 0.254       | 15            | 28  | 57                            |
| HOMO-1       | -0.619      | 70            | 15  | 15                            |
| HOMO-2       | -1.037      | 64            | 29  | 7                             |
| HOMO-3       | -1.407      | 47            | 16  | 38                            |
| HOMO-4       | -2.472      | 6             | 7   | 86                            |
| HOMO-5       | -2.520      | 6             | 9   | 86                            |

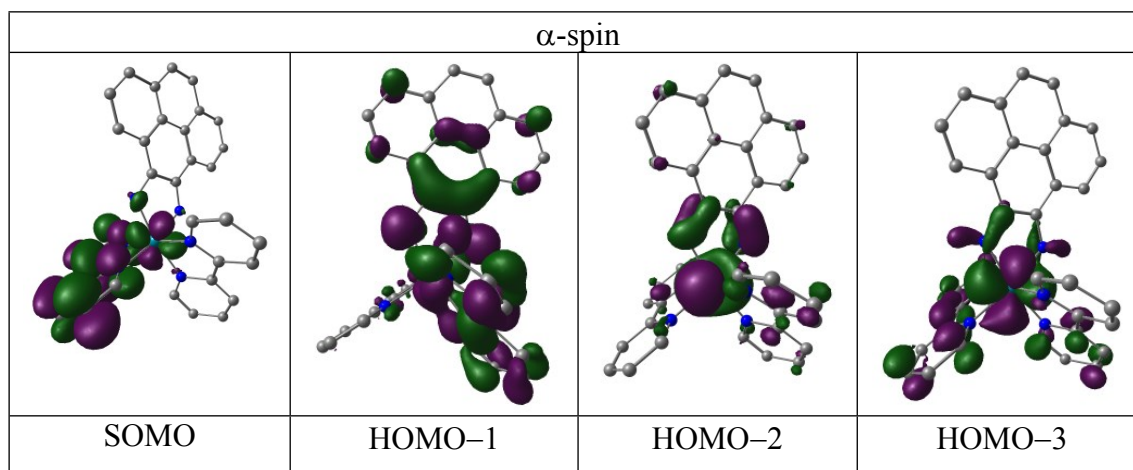



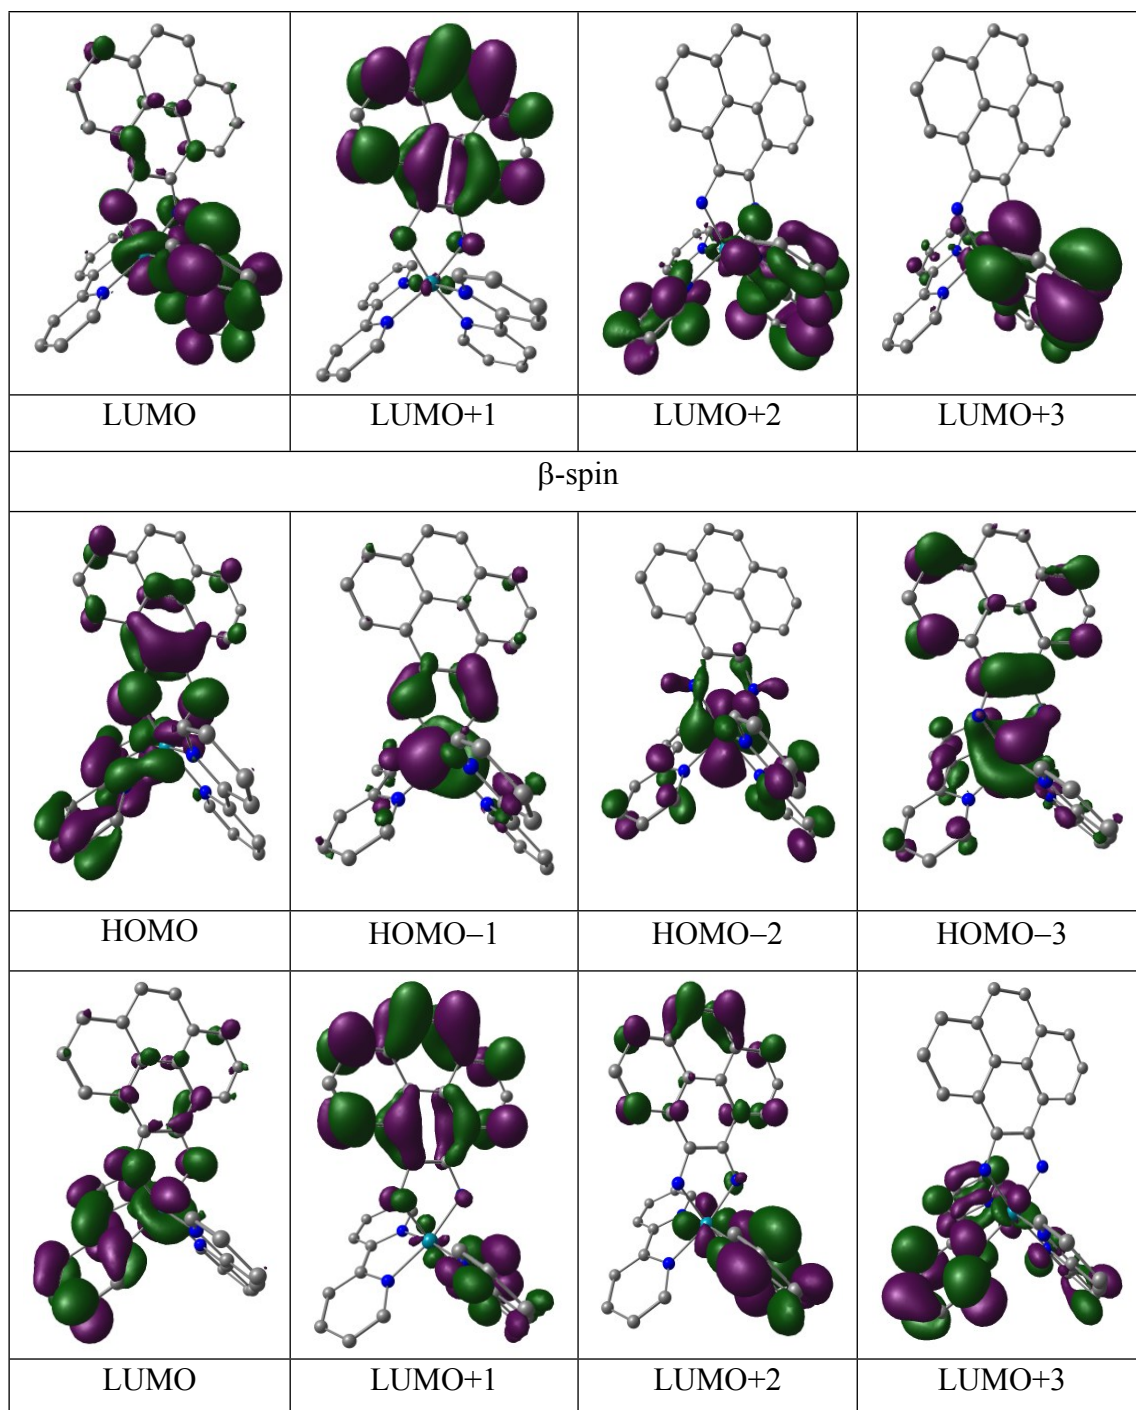

**Table S41** DFT calculated MO composition for  $4^{2-}$  in  $S = 1$  state

| MO           | energy (eV) | % composition |     |                               |
|--------------|-------------|---------------|-----|-------------------------------|
|              |             | Os            | bpy | H <sub>2</sub> L <sup>2</sup> |
| $\alpha$ -MO |             |               |     |                               |
| LUMO+5       | 4.731       | 7             | 88  | 6                             |
| LUMO+4       | 4.722       | 10            | 83  | 7                             |
| LUMO+3       | 4.598       | 2             | 11  | 87                            |
| LUMO+2       | 4.526       | 4             | 93  | 2                             |
| LUMO+1       | 4.329       | 5             | 93  | 3                             |
| LUMO         | 3.779       | 6             | 14  | 80                            |
| SOMO1        | 3.727       | 15            | 49  | 35                            |
| SOMO2        | 3.217       | 16            | 75  | 9                             |
| HOMO-2       | 2.973       | 6             | 52  | 42                            |
| HOMO-3       | 2.288       | 68            | 15  | 16                            |
| HOMO-4       | 1.678       | 62            | 30  | 8                             |
| HOMO-5       | 1.431       | 47            | 18  | 35                            |
| $\beta$ -MO  |             |               |     |                               |
| LUMO+5       | 4.665       | 6             | 89  | 5                             |
| LUMO+4       | 4.636       | 1             | 11  | 87                            |
| LUMO+3       | 4.438       | 5             | 93  | 3                             |
| LUMO+2       | 4.065       | 17            | 65  | 18                            |
| LUMO+1       | 3.917       | 3             | 9   | 87                            |
| LUMO         | 3.744       | 12            | 78  | 10                            |
| HOMO         | 3.177       | 11            | 41  | 48                            |
| HOMO-1       | 2.417       | 67            | 16  | 16                            |
| HOMO-2       | 1.959       | 62            | 30  | 8                             |
| HOMO-3       | 1.655       | 43            | 18  | 39                            |
| HOMO-4       | 0.466       | 7             | 8   | 85                            |
| HOMO-5       | 0.343       | 4             | 15  | 81                            |

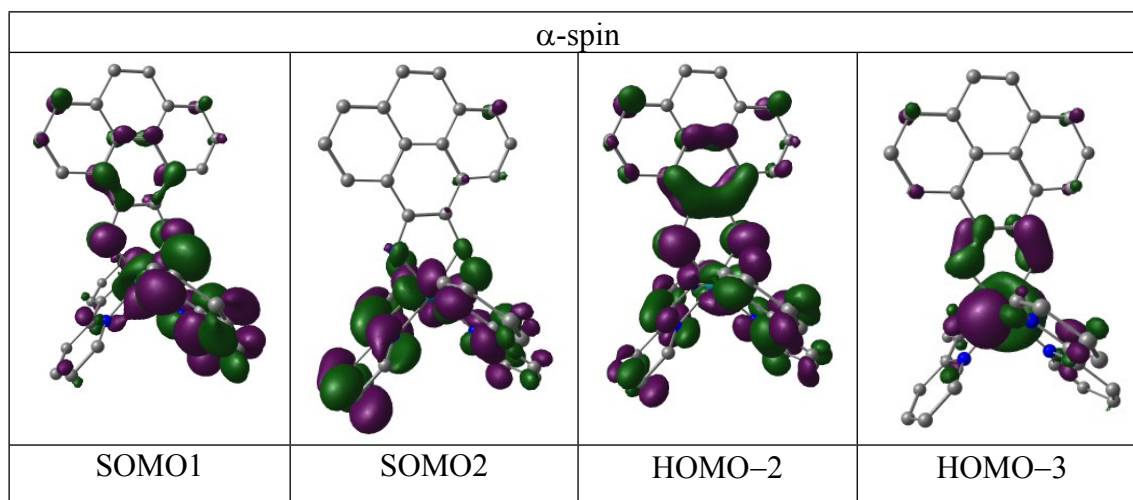

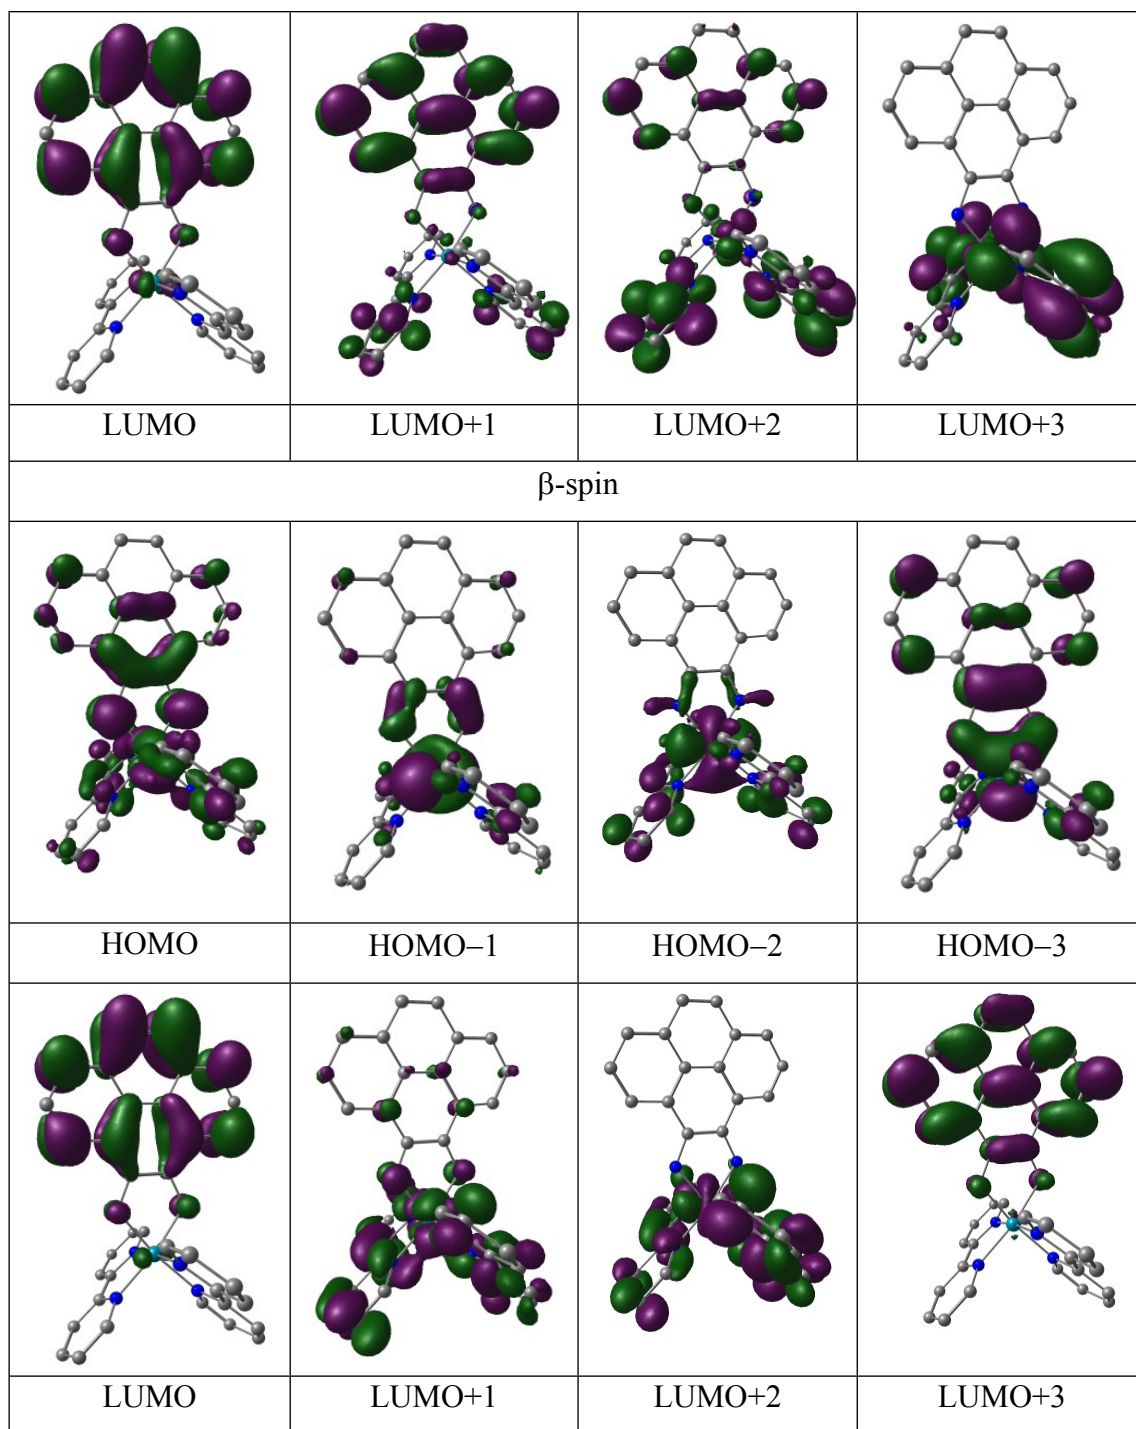

Supplement: d1dt00282a1.pdf [file d1dt00282a1.pdf]
